# Supplementary material
Source: PubMed Central journal article supplement (PMC10354740)
Supplement: NIHMS1905921-supplement-SI_file.pdf [file NIHMS1905921-supplement-SI_file.pdf]

## Supporting information

### Structure-Activity Studies of 1*H*-Imidazo[4,5-*c*]quinolin-4-amine Derivatives as A<sub>3</sub> Adenosine Receptor Positive Allosteric Modulators

Lucas B. Fallot,<sup>1,2,3+</sup> R. Rama Suresh,<sup>1+</sup> Courtney L. Fisher,<sup>4</sup> Veronica Salmaso,<sup>1</sup> Robert D. O'Connor,<sup>1</sup> Noy Kaufman,<sup>1</sup> Zhan-Guo Gao,<sup>1</sup> John A. Auchampach,<sup>4</sup> Kenneth A. Jacobson<sup>1\*</sup>

<sup>1</sup>Molecular Recognition Section, Laboratory of Bioorganic Chemistry, National Institute of Diabetes and Digestive and Kidney Diseases, National Institutes of Health, 9000 Rockville Pike, Bethesda, MD, USA 20892.

<sup>2</sup>Department of Biochemistry and Molecular Biology, Uniformed Services University of the Health Sciences, 4301 Jones Bridge Road, Bethesda, MD, USA 20814.

<sup>3</sup>Department of Chemistry and Life Science, United States Military Academy, 646 Swift Road, West Point, NY, USA 10996.

<sup>4</sup>Department of Pharmacology and Toxicology, Medical College of Wisconsin, 8701 Watertown Plank Road, Milwaukee, WI, USA 53226.

+ equal contribution.

Corresponding Author's email address: [kennethj@niddk.nih.gov](mailto:kennethj@niddk.nih.gov)

| <u>Contents</u>                                                                 | <u>Page(s)</u> |
|---------------------------------------------------------------------------------|----------------|
| Synthetic route, chemical synthesis and SAR discussion<br>(Scheme S1, Table S1) | S2–S7          |
| Pharmacological results (Tables S2–S4)                                          | S11–S13        |
| Calculated ADMET parameters (Table S5)                                          | S14–S19        |
| Off-target activity (PDSP screening)                                            | S20            |
| Experimental ADMET (Tables S6–S8)                                               | S21–S22        |
| NMR spectra (compounds <b>13–45t</b> , 400 MHz)                                 | S23–S58        |
| NMR spectra (compounds <b>27</b> , <b>29</b> and <b>30</b> , 600 MHz)           | S59–S68        |
| Mass spectra                                                                    | S69–S97        |
| HPLC Purity                                                                     | S98–S105       |
| Orthosteric affinity of compounds <b>7</b> and <b>17</b> (Figures S1)           | S106–S107      |
| Molecular modeling (Figures S2–S5)                                              | S108–S109      |
| References                                                                      | S110–S111      |

**Scheme S1.** Alternative route to A<sub>3</sub>AR PAMs **13**, **14**, and **16**.

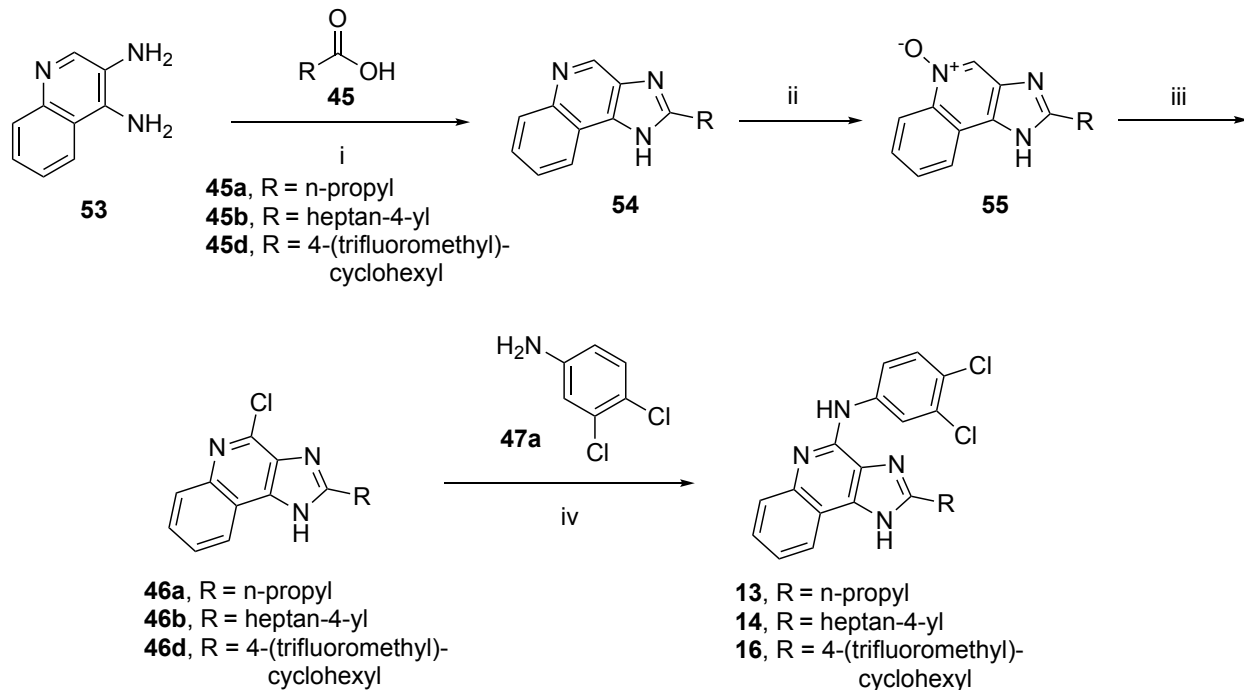

<sup>a</sup>Reagents and conditions: i. polyphosphoric acid, 100 °C, 8–24 h; ii. *m*-CPBA, CHCl<sub>3</sub>, CH<sub>2</sub>Cl<sub>2</sub>, MeOH, reflux, 30 min; iii. POCl<sub>3</sub>, toluene, DMF, 100 °C, 1.5 h;<sup>1, 2</sup> iv. General Procedure C (main text).

**Scheme S2.** Preparation of 5,5,5-Trifluoro-2-(3,3,3-trifluoropropyl)pentanoic Acid (**45c**).

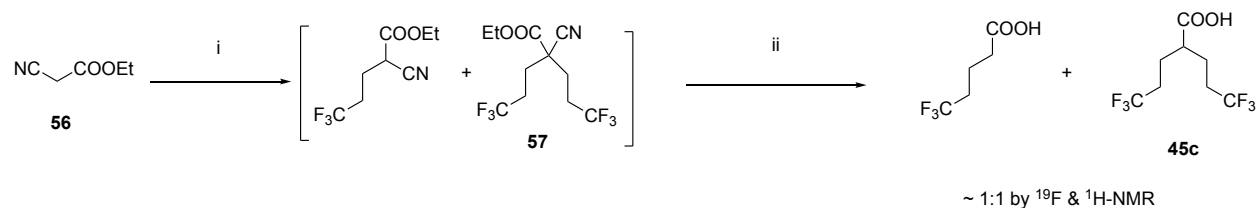

Reagents and conditions: i. F<sub>3</sub>CCH<sub>2</sub>CH<sub>2</sub>Br (2.5 equiv), K<sub>2</sub>CO<sub>3</sub> (2.1 equiv), DMF (sufficient to achieve a concentration of 0.4 M **57**), 60 °C, 48 h; ii. aq. NaOH (2.5 N, 50 equiv), tetrabutylammonium bromide (TBAB), 90 °C, 36 h, ~50%.

**Scheme S3.** Preparation of cyclononane and cyclodecane carboxylic acids (**45l–m**).

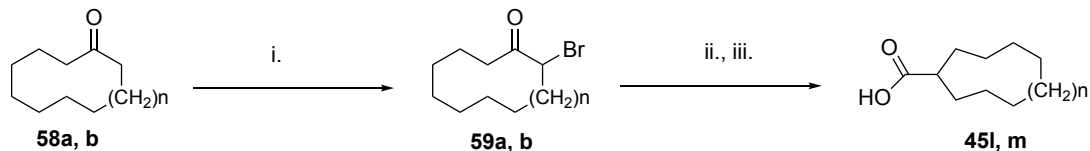

n = 1, cyclodecanone **58a** converted to cyclononanecarboxylic acid **45l**  
 n = 2, cycloundecanone **58b** converted to cyclodecanecarboxylic acid **45m**

Reagents and conditions: i. NBS, PTSA, DCM, rt, 16 h; ii. NaOCH<sub>3</sub>, EtO<sub>2</sub>, rt, 20 h; iii. aqueous NaOH, reflux, 30 min, 27–29%.

**Scheme S4.** Preparation of (1*R*,2*R*,4*R*)- & (1*S*,2*S*,4*S*)-bicyclo[2.2.2]oct-5-ene carboxylic acid.

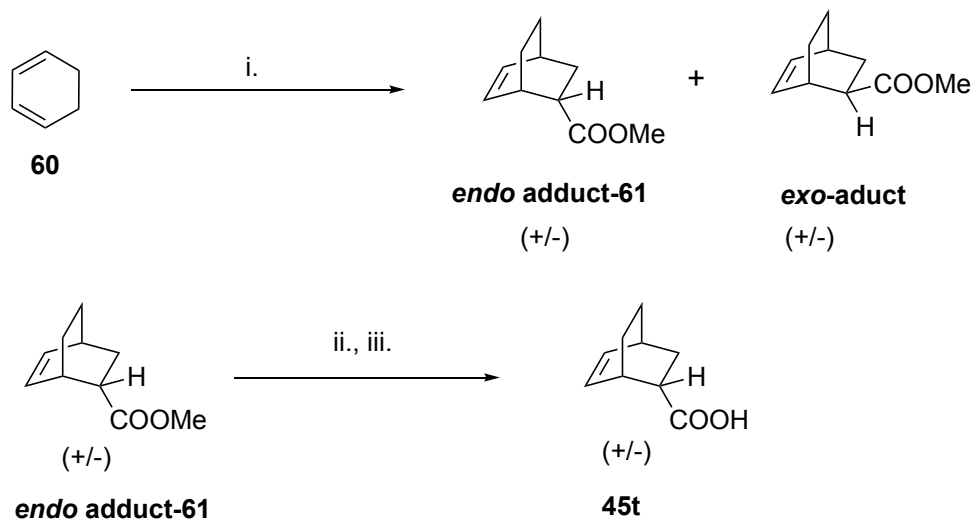

Reagents and conditions: i. cyclohexa-1,3-diene, methyl acrylate, toluene, 180 °C, 22 h; ii. aqueous NaOH:MeOH, rt, 1h; iii. 1M HCl, 54%.

**Scheme S5.** Preparation of stannyl precursors to  $^{125}\text{I}$  radioligand.

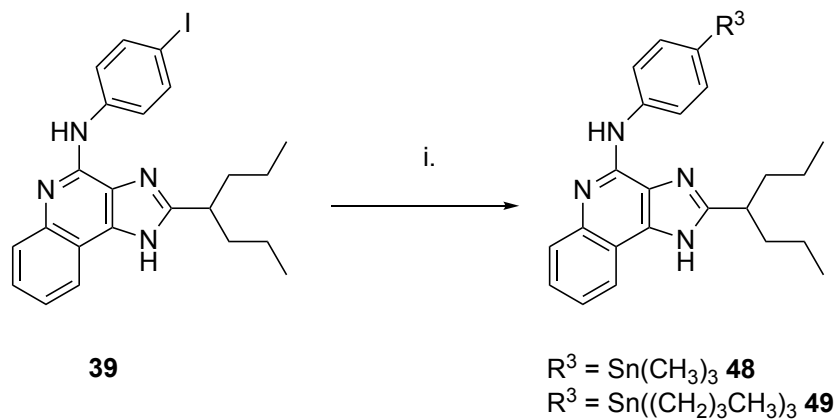

Reagents and conditions: i.  $\text{PdCl}_2(\text{PPh}_3)_2$ ,  $(\text{CH}_3)_3\text{Sn-Sn}(\text{CH}_3)_3$  or  $(\text{CH}_3(\text{CH}_2)_3)_3\text{Sn-Sn}((\text{CH}_2)_3\text{CH}_3)_3$  dioxane, 70 °C, 2.5 h, 10–13%.

**Scheme S6.** Potential radioiodination reaction to synthesize an  $^{125}\text{I}$  radioligand.

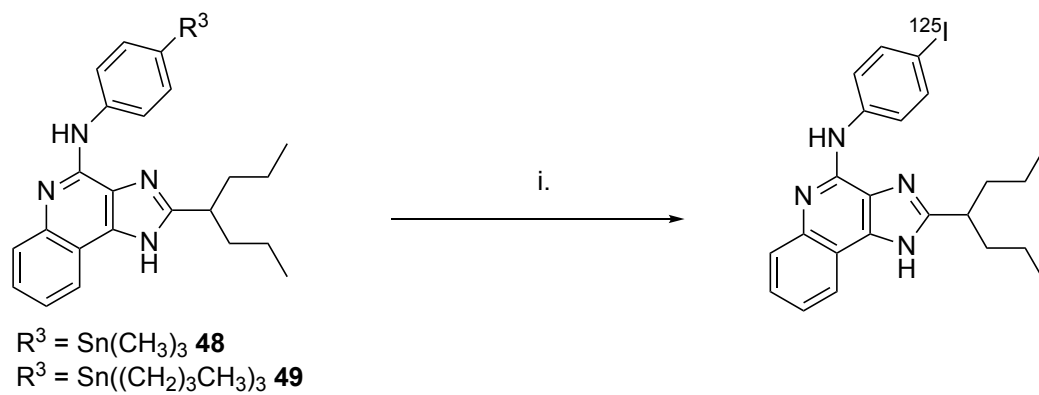

Reagents and conditions: i.  $[^{125}\text{I}]\text{NaI}$ , peracetic acid, rt, 10 min.

**Chemical Synthesis:**

All reagents and solvents were from Sigma-Aldrich (St. Louis, MO). Unless noted, <sup>1</sup>H-NMR spectra were obtained with a Bruker 400 MHz spectrometer in CDCl<sub>3</sub> (7.26 ppm), CD<sub>3</sub>OD (HOD = 4.87 ppm), (CD<sub>3</sub>)<sub>2</sub>SO (<sup>1</sup>H=2.50 ppm), or in a mixture of CD<sub>3</sub>OD/CDCl<sub>3</sub>. The chemical shifts are expressed as ppm downfield, and coupling constants (*J*) are given in Hz. TLC analysis was carried out on glass sheets precoated with silica gel F254 (0.2 mm) from Aldrich. 3,4-Diaminoquinolines (**53**, **54** and **55**) and 2-chloroquinoline-3,4-diamines (**46a**, **b** and **d**)<sup>3</sup> were prepared by the literature procedures.<sup>1,2</sup> The purity of final compounds (**5b**, **e** and **f**) was checked using a Hewlett–Packard 1100 HPLC equipped with an Agilent Eclipse 5 μm XDB-C18 analytical column (50 mm × 4.6 mm; Agilent Technologies Inc., Palo Alto, CA). Mobile phase: linear gradient solvent system, 10 mM TEAA (triethylammonium acetate):CH<sub>3</sub>CN from 95:5 to 0:100 in 20 min; the flow rate was 1.0 mL/min. Peaks were detected by UV absorption with a diode array detector at 230, 254, and 280 nm. All derivatives tested for biological activity showed >95 % purity in the HPLC systems. Low-resolution mass spectrometry was performed with a JEOL SX102 spectrometer with 6 kV Xe atoms following desorption from a glycerol matrix or on an Agilent LC/MS 1100 MSD, with a Waters Atlantis C18 column (Milford, MA, USA). High resolution mass spectroscopic (HRMS) measurements were performed on a proteomics optimized Q-TOF-2 (Micromass-Waters) using external calibration with polyalanine, unless noted. Mass accuracies were observed.

*General procedure for 2-substituted 4-chloro-1H-imidazo[4,5-c]quinolines (**46a**, **b** and **d**)<sup>1,2</sup>*

To a stirred solution of the appropriate 1H-imidazo[4,5-c]quinolin-5-oxide in a mixture of toluene (0.50 mL- 4.0 mL) and DMF (0.50 mL – 1.0 mL) at 0 °C, phosphorus oxychloride (2.6

equiv) was added and the solution stirred at rt for 10 min. The reaction mixture stirred at 110 °C for 2-3 h. The reaction was monitored by mass spectrometry and continued until the starting material, *N*-oxide derivative (**55a, b and d**) disappeared. The reaction mixture was cooled to rt, neutralized with half saturated aqueous NaHCO<sub>3</sub> solution (10 mL) and diluted with EtOAc (25 ml). The phases were separated, and the aqueous phase was extracted with EtOAc (2 x 15 mL). The combined organic phases were dried over Na<sub>2</sub>SO<sub>4</sub> and filtered. The filtrate was concentrated by rotary evaporation to obtain the crude product, which was and purified by silica column to get the 2-substituted-4-chloro-1*H*-imidazo[4,5-*c*]quinolines (**46a, b and d**).

*General procedure for the synthesis of 2-substituted 1H-imidazo[4,5-*c*]quinoline derivatives (54a, b and d)<sup>1,2</sup>*

Polyphosphoric acid, 115 % H<sub>3</sub>PO<sub>4</sub> basis (1.5–2.0 g) was added to 3,4-diaminoquinoline (**53**, 1.0 equiv) and the appropriate carboxylic acid (1.2–1.5 equiv). The reaction mixture was stirred at 100 °C for 8–16 h. The mixture was cooled to ~40–45 °C and poured into a beaker with crushed ice (~30–35g). The reaction mass was slowly neutralized with con. ammonia (23%) at 0 °C until a pH of 8–9. and diluted with EtOAc (25 ml). The phases were separated, and the aqueous phase was extracted with EtOAc (3x 15 mL). The combined EtOAc layer was dried over Na<sub>2</sub>SO<sub>4</sub> and filtered. The filtrate was concentrated by rotary evaporation to obtain the crude, which was purified by silica column to get the 1*H*-imidazo[4,5-*c*]quinoline derivative.

*General procedure for 2-substituted 1H-imidazo[4,5-*c*]quinoline-5-oxide (55a, b and d)<sup>1,2</sup>*

To a stirred solution of the appropriate 2-substituted-1*H*-imidazo[4,5-*c*]quinoline derivatives (**54a, b and d**) in a mixture of 10% MeOH in CHCl<sub>3</sub>, *m*-CPBA (2.5 equiv) was added and the

reaction mixture stirred for 30 min with gentle reflux. The reaction mixture was cooled to rt and quenched with half saturated NaHCO<sub>3</sub> (5 mL). The phases were separated, and the aqueous phase was extracted with a mixture of isopropyl alcohol and chloroform (1:2, 2 x 15 mL). The combined organic phase was dried over Na<sub>2</sub>SO<sub>4</sub> and filtered. The filtrate was concentrated by rotary evaporation to obtain the crude product and purified by silica column to get the 2-substituted-1*H*-imidazo[4,5-*c*]quinoline-5-oxide (**55a**, **b** and **d**).

**Table S1.** 1*H*-Imidazo[4,5-*c*]quinolin-4-amine Derivatives Synthesized for Pharmacological Studies.

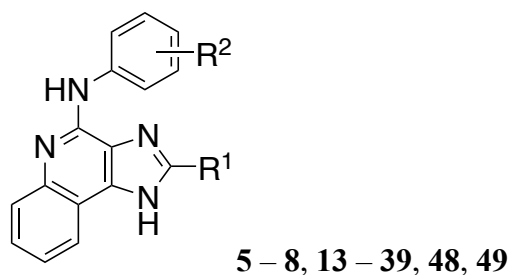

| Compound                                    | R <sup>2</sup>      | R <sup>1</sup> | Yield <sup>a</sup> (%<br>final step) |
|---------------------------------------------|---------------------|----------------|--------------------------------------|
| <i>2-alkyl and 2-cycloalkyl derivatives</i> |                     |                |                                      |
| <b>13</b>                                   | 3,4-Cl <sub>2</sub> |                | 23 <sup>b</sup>                      |
| <b>14</b>                                   | 3,4-Cl <sub>2</sub> |                | 11 <sup>b</sup>                      |
| <b>15</b>                                   | 3,4-Cl <sub>2</sub> |                | 50 <sup>b</sup>                      |
| <b>16</b>                                   | 3,4-Cl <sub>2</sub> |                | 21 <sup>b</sup>                      |
| <b>17</b>                                   | 3,4-Cl <sub>2</sub> |                | 18 <sup>b</sup>                      |
| <b>5</b>                                    | 3,4-Cl <sub>2</sub> |                | 17 <sup>b</sup>                      |

|                                   |                     |                                                                                            |                 |
|-----------------------------------|---------------------|--------------------------------------------------------------------------------------------|-----------------|
| 6                                 | 3,4-Cl <sub>2</sub> | 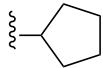          | 23 <sup>b</sup> |
| 7                                 | 3,4-Cl <sub>2</sub> |           | 28 <sup>b</sup> |
| 8                                 | 3,4-Cl <sub>2</sub> |           | 51 <sup>b</sup> |
| 18                                | 3,4-Cl <sub>2</sub> |           | 23 <sup>b</sup> |
| 19                                | 3,4-Cl <sub>2</sub> |           | 27 <sup>b</sup> |
| 20                                | 3,4-Cl <sub>2</sub> |           | 5 <sup>b</sup>  |
| 21                                | 3,4-Cl <sub>2</sub> |           | 16 <sup>b</sup> |
| 22                                | 3,4-Cl <sub>2</sub> |          | 15 <sup>b</sup> |
| 23                                | 3,4-Cl <sub>2</sub> |         | 25 <sup>d</sup> |
| <i>2-bicycloalkyl derivatives</i> |                     |                                                                                            |                 |
| 24                                | 3,4-Cl <sub>2</sub> |         | 13 <sup>c</sup> |
| 25                                | 3,4-Cl <sub>2</sub> |         | 33 <sup>c</sup> |
| 26                                | 3,4-Cl <sub>2</sub> |         | 22 <sup>c</sup> |
| 27                                | 3,4-Cl <sub>2</sub> |  (endo) | 2 <sup>c</sup>  |



|                                                                              |                                                                                             |                                                                                          |                 |
|------------------------------------------------------------------------------|---------------------------------------------------------------------------------------------|------------------------------------------------------------------------------------------|-----------------|
| 28                                                                           | 3,4-Cl <sub>2</sub>                                                                         | 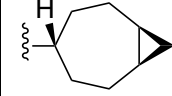        | 13 <sup>e</sup> |
| 29                                                                           | 3,4-Cl <sub>2</sub>                                                                         |  (endo) | 36 <sup>d</sup> |
| <i>2-cycloalkyl derivatives with hydrophilic substitution</i>                |                                                                                             |                                                                                          |                 |
| 30                                                                           | 3,4-Cl <sub>2</sub>                                                                         |         | 6 <sup>f</sup>  |
| 31                                                                           | 3,4-Cl <sub>2</sub>                                                                         |         | 12 <sup>f</sup> |
| 32                                                                           | 3,4-Cl <sub>2</sub>                                                                         |  (±)    | 23 <sup>g</sup> |
| 33                                                                           | 3,4-Cl <sub>2</sub>                                                                         |  (±)    | 8 <sup>h</sup>  |
| 34                                                                           | 3,4-Cl <sub>2</sub>                                                                         |  (±)   | 12 <sup>h</sup> |
| <i>2-alkyl and 2-cycloalkyl derivatives with modified 2-arylamino groups</i> |                                                                                             |                                                                                          |                 |
| 35                                                                           | 4-I                                                                                         |       | 61 <sup>d</sup> |
| 36                                                                           | 4-Br                                                                                        |       | 10 <sup>d</sup> |
| 37                                                                           | <br>(4-) |       | 18 <sup>i</sup> |
| 38                                                                           | <br>(4-) |       | 10 <sup>j</sup> |
| 39                                                                           | 4-I                                                                                         |       | 11 <sup>d</sup> |
| 48                                                                           | 4-Sn(CH <sub>3</sub> ) <sub>3</sub>                                                         |       | 10 <sup>k</sup> |

|    |                                                                     |                                                                                   |                 |
|----|---------------------------------------------------------------------|-----------------------------------------------------------------------------------|-----------------|
| 49 | 4-Sn((CH <sub>2</sub> ) <sub>3</sub> CH <sub>3</sub> ) <sub>3</sub> | 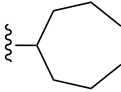 | 13 <sup>1</sup> |
|----|---------------------------------------------------------------------|-----------------------------------------------------------------------------------|-----------------|

- a. Isolated yield.
- b. Final general procedure C (viii, in Reagents and Conditions of Scheme 1) used.
- c. Final general procedure D (ix, in Reagents and Conditions of Scheme 1) used.
- d. Final general procedure E (x, in Reagents and Conditions of Scheme 1) used.
- e. **18**, Et<sub>2</sub>Zn, CH<sub>2</sub>I<sub>2</sub> (xi, in Reagents and Conditions of Scheme 1).
- f. **18**, *m*-CPBA, CHCl<sub>3</sub> (xii, in Reagents and Conditions of Scheme 1).
- g. **18**, (CH<sub>3</sub>)<sub>2</sub>S·BH<sub>3</sub>, THF, NaOH, H<sub>2</sub>O<sub>2</sub>, 0 °C (xiii, in Reagents and Conditions of Scheme 1).
- h. **33** and **34**, DMP, CHCl<sub>3</sub> (xiv, in Reagents and Conditions of Scheme 1).
- i. **36**, Pd(OAc)<sub>2</sub>, CH<sub>2</sub>=CHCOOCH<sub>3</sub>, Et<sub>3</sub>N, 140 °C (xv, in Reagents and Conditions of Scheme 1).
- j. **35**, Pd(Ph<sub>3</sub>P)<sub>2</sub>Cl<sub>2</sub>, C<sub>6</sub>H<sub>3</sub>Cl<sub>5</sub>, CuI, Et<sub>3</sub>N, 80 °C (xvi, in Reagents and Conditions of Scheme 1).
- k. **39**, Pd(Ph<sub>3</sub>P)<sub>2</sub>Cl<sub>2</sub>, hexamethylditin, 70 °C.
- l. **39**, Pd(Ph<sub>3</sub>P)<sub>2</sub>Cl<sub>2</sub>, hexabutylditin, 70 °C.

**Table S2.** Effect of PAM derivatives (10  $\mu$ M) on dissociation of [ $^{125}$ I]**50** (0.3 nM) using hA<sub>3</sub>ARs (n=3). P-value is shown with respect to control in the absence of a PAM. Statistical significance was calculated by two-tailed Student's t-test. Data are presented as mean  $\pm$  SEM. Percent radioligand remaining bound was determined 60 min after the initiation of dissociation with the competitive agonist adenosine-5'-N-ethylcarboxamide (**51**, 100  $\mu$ M).

| Compound ID | % Remaining | SEM | P-value            |
|-------------|-------------|-----|--------------------|
| <b>13</b>   | 24.6        | 1.8 | 0.760              |
| <b>14</b>   | 71.2        | 2.7 | 0.001 <sup>b</sup> |
| <b>15</b>   | 45.2        | 5.1 | 0.056 <sup>b</sup> |
| <b>16</b>   | 25.9        | 4.4 | 0.958 <sup>b</sup> |
| <b>17</b>   | 33.3        | 2.4 | 0.271              |
| <b>5</b>    | 36.2        | 3.8 | 0.187              |
| <b>6</b>    | 43.4        | 5.2 | 0.075              |
| <b>7</b>    | 54.4        | 3.4 | 0.009 <sup>b</sup> |
| <b>8</b>    | 52.2        | 6.1 | 0.030 <sup>b</sup> |
| <b>18</b>   | 54.1        | 3.4 | 0.001 <sup>b</sup> |
| <b>19</b>   | 44.5        | 4.1 | 0.046 <sup>b</sup> |
| <b>20</b>   | 37.1        | 4.7 | 0.188              |
| <b>21</b>   | 24.6        | 3.1 | 0.786              |
| <b>22</b>   | 24.5        | 4.6 | 0.808              |
| <b>23</b>   | 23.9        | 4.5 | 0.735              |
| <b>24</b>   | 45.6        | 3.8 | 0.036 <sup>b</sup> |
| <b>25</b>   | 44.5        | 4.0 | 0.046 <sup>b</sup> |
| <b>12a</b>  | 38          | 5   | 0.168              |
| <b>12b</b>  | 51          | 3   | 0.013 <sup>b</sup> |
| <b>26</b>   | 52.1        | 3.1 | 0.011 <sup>b</sup> |
| <b>27</b>   | 46.1        | 4.4 | 0.040              |
| <b>28</b>   | 45.7        | 4.9 | 0.048              |
| <b>29</b>   | 42.1        | 5.6 | 0.100              |
| <b>30</b>   | 33.2        | 4.3 | 0.350              |
| <b>31</b>   | 39.4        | 3.6 | 0.098              |
| <b>32</b>   | 33.1        | 3.7 | 0.328              |
| <b>33</b>   | 33.0        | 3.7 | 0.340              |
| <b>34</b>   | 34.9        | 3.0 | 0.210              |
| <b>35</b>   | 57.8        | 4.8 | 0.010              |
| <b>36</b>   | 55.8        | 5.2 | 0.015 <sup>b</sup> |
| <b>37</b>   | 49.6        | 7.0 | 0.052              |
| <b>38</b>   | 32.5        | 5.5 | 0.450              |
| <b>39</b>   | 65.3        | 4.0 | 0.003 <sup>b</sup> |

<sup>a</sup> The effect of these compounds on radioligand dissociation was reported by Fisher et al.<sup>3</sup>

<sup>b</sup> Significant difference compared to control (Student T-test, P  $\leq$ 0.05).

**Table S3.** Effect of PAM derivatives (10  $\mu$ M) on the equilibrium binding of [ $^{125}$ I]**50** (0.3 nM) at the hA<sub>3</sub>AR (n=3). P-value is shown with respect to control in the absence of a PAM.

| Compound ID | % Change from Vehicle | SEM  | P-value            |
|-------------|-----------------------|------|--------------------|
| 13          | -45.2                 | 1.6  | 0.002 <sup>b</sup> |
| 14          | 70.2                  | 9.3  | 0.020 <sup>b</sup> |
| 15          | 18.4                  | 5.3  | 0.035 <sup>b</sup> |
| 16          | -4.5                  | 2.2  | 0.171              |
| 17          | -70.9                 | 2.3  | 0.006 <sup>b</sup> |
| 5           | -23.3                 | 3.0  | 0.028 <sup>b</sup> |
| 6           | 1.9                   | 4.3  | 0.662              |
| 7           | 4.3                   | 14.2 | 0.722              |
| 8           | 0.3                   | 0.1  | 0.052              |
| 18          | -11.8                 | 1.6  | 0.026 <sup>b</sup> |
| 19          | 41.3                  | 4.7  | 0.019 <sup>b</sup> |
| 20          | 27.8                  | 3.2  | 0.007 <sup>b</sup> |
| 21          | 17.5                  | 5.0  | 0.084              |
| 22          | 15.7                  | 5.6  | 0.083              |
| 23          | 6.9                   | 2.2  | 0.070              |
| 24          | -5                    | 1.8  | 0.135              |
| 25          | -6.7                  | 3.3  | 0.204              |
| 12a         | -28.8                 | 3.1  | 0.007 <sup>b</sup> |
| 12b         | 18.7                  | 3.1  | 0.031 <sup>b</sup> |
| 26          | 38.3                  | 4.6  | 0.012 <sup>b</sup> |
| 27          | 41                    | 4.9  | 0.007 <sup>b</sup> |
| 28          | -36.6                 | 5.9  | 0.056              |
| 29          | -20.5                 | 2.5  | 0.032 <sup>b</sup> |
| 30          | -21.3                 | 3.0  | 0.050 <sup>b</sup> |
| 31          | -24.1                 | 2.8  | 0.040 <sup>b</sup> |
| 32          | -19.1                 | 2.6  | 0.050 <sup>b</sup> |
| 33          | -35.8                 | 2.1  | 0.023 <sup>b</sup> |
| 34          | -31.3                 | 3.1  | 0.037 <sup>b</sup> |
| 35          | -31.1                 | 3.5  | 0.04 <sup>b</sup>  |
| 36          | -48.9                 | 5.5  | 0.036 <sup>b</sup> |
| 37          | 14.6                  | 4.0  | 0.011 <sup>b</sup> |
| 38          | 19.5                  | 6.4  | 0.055              |
| 39          | 22.9                  | 10.2 | 0.125              |

<sup>a</sup> The effect of these compounds on radioligand equilibrium binding was reported by Fisher et al.<sup>3</sup>

<sup>b</sup> Significant difference compared to control (Student T-test,  $P \leq 0.05$ ).

**Table S4.** Effect of PAM derivatives on [<sup>35</sup>S]GTPγS binding induced by Cl-IB-MECA using WT hA<sub>3</sub>ARs (n=3). P-value is shown with respect to control in the absence of a PAM.<sup>a</sup>

| ID  | DMSO                  |                   |                      | 0.1 μM Compound       |                   |         |                      |         | 1.0 μM Compound       |                   |         |                      |         | 10 μM Compound        |                   |         |                      |         |
|-----|-----------------------|-------------------|----------------------|-----------------------|-------------------|---------|----------------------|---------|-----------------------|-------------------|---------|----------------------|---------|-----------------------|-------------------|---------|----------------------|---------|
|     | EC <sub>50</sub> (nM) | pEC <sub>50</sub> | E <sub>max</sub> (%) | EC <sub>50</sub> (nM) | pEC <sub>50</sub> | P-value | E <sub>max</sub> (%) | P-value | EC <sub>50</sub> (nM) | pEC <sub>50</sub> | P-value | E <sub>max</sub> (%) | P-value | EC <sub>50</sub> (nM) | pEC <sub>50</sub> | P-value | E <sub>max</sub> (%) | P-value |
| 13  | 21                    | 7.68 ± 0.08       | 100 ± 3              | 166                   | 6.78 ± 0.16*      | 0.0041  | 132 ± 8              | 0.0684  | 852                   | 6.24 ± 0.16*      | 0.0002  | 153 ± 12*            | 0.0051  | 305                   | 6.52 ± 0.11*      | 0.0008  | 131 ± 6              | 0.0773  |
| 14  | 47                    | 7.32 ± 0.16       | 100 ± 6              | 23                    | 7.64 ± 0.16       | 0.5129  | 171 ± 9*             | 0.0017  | 17                    | 7.77 ± 0.16       | 0.2041  | 216 ± 12*            | <0.0001 | 25                    | 7.60 ± 0.11       | 0.6711  | 216 ± 9*             | <0.0001 |
| 15  | 48                    | 7.32 ± 0.14       | 99 ± 5               | 43                    | 7.37 ± 0.16       | >0.9999 | 118 ± 7              | 0.5343  | 52                    | 7.28 ± 0.20       | >0.9999 | 159 ± 13*            | 0.0043  | 47                    | 7.33 ± 0.13       | >0.9999 | 185 ± 9*             | 0.0004  |
| 16  | 18                    | 7.74 ± 0.10       | 99 ± 3               | 23                    | 7.65 ± 0.10       | >0.9999 | 120 ± 4*             | 0.0377  | 21                    | 7.68 ± 0.11       | >0.9999 | 150 ± 5*             | 0.0002  | 156                   | 6.94 ± 0.08*      | 0.0012  | 174 ± 6*             | <0.0001 |
| 17  | 27                    | 7.58 ± 0.06       | 100 ± 2              | 44                    | 7.36 ± 0.23       | >0.9999 | 117 ± 8              | >0.9999 | 1994                  | 6.70 ± 0.40       | 0.1976  | 111 ± 16             | >0.9999 | 765                   | 6.12 ± 0.35*      | 0.0226  | 90 ± 20              | >0.9999 |
| 5   | 27                    | 7.57 ± 0.08       | 100 ± 3              | 48                    | 7.32 ± 0.10       | 0.2748  | 113 ± 4              | 0.2896  | 77                    | 7.12 ± 0.08*      | 0.0258  | 109 ± 3              | 0.7374  | 352                   | 6.45 ± 0.11*      | <0.0001 | 135 ± 8*             | 0.003   |
| 6   | 13                    | 7.90 ± 0.09       | 100 ± 3              | 24                    | 7.61 ± 0.11       | 0.2176  | 110 ± 4              | 0.6257  | 37                    | 7.43 ± 0.11*      | 0.0279  | 142 ± 5*             | 0.0012  | 137                   | 6.86 ± 0.08*      | 0.0002  | 201 ± 7*             | <0.0001 |
| 7   | 15                    | 7.82 ± 0.16       | 100 ± 5              | 20                    | 7.70 ± 0.18       | >0.9999 | 154 ± 9*             | 0.0298  | 23                    | 7.64 ± 0.14       | >0.9999 | 225 ± 10*            | 0.0002  | 73                    | 7.14 ± 0.19       | 0.0649  | 241 ± 18*            | <0.0001 |
| 8   | 18                    | 7.76 ± 0.09       | 100 ± 3              | 13                    | 7.90 ± 0.10       | 0.7155  | 120 ± 4*             | 0.0176  | 16                    | 7.80 ± 0.05       | >0.9999 | 175 ± 3*             | <0.0001 | 60                    | 7.22 ± 0.08*      | 0.005   | 218 ± 6*             | <0.0001 |
| 18  | 36                    | 7.44 ± 0.09       | 100 ± 3              | 24                    | 7.61 ± 0.15       | 0.952   | 147 ± 7*             | 0.0107  | 16                    | 7.79 ± 0.11       | 0.1971  | 241 ± 9*             | <0.0001 | 81                    | 7.09 ± 0.09       | 0.2026  | 287 ± 11*            | <0.0001 |
| 19  | 38                    | 7.42 ± 0.07       | 100 ± 2              | 30                    | 7.52 ± 0.07       | 0.951   | 107 ± 3              | 0.3555  | 266                   | 7.59 ± 0.05       | 0.3631  | 146 ± 2*             | <0.0001 | 23                    | 7.63 ± 0.08       | 0.1772  | 164 ± 4*             | <0.0001 |
| 20  | 41                    | 7.38 ± 0.08       | 100 ± 3              | 26                    | 7.58 ± 0.13       | 0.9689  | 143 ± 6*             | 0.0459  | 20                    | 7.71 ± 0.15       | 0.3712  | 241 ± 12*            | <0.0001 | 29                    | 7.54 ± 0.15       | >0.9999 | 259 ± 14*            | <0.0001 |
| 21  | 24                    | 7.61 ± 0.08       | 100 ± 3              | 19                    | 7.72 ± 0.15       | >0.9999 | 109 ± 6              | >0.9999 | 15                    | 7.82 ± 0.14       | 0.9089  | 135 ± 7*             | 0.0182  | 16                    | 7.80 ± 0.16       | >0.9999 | 195 ± 10*            | <0.0001 |
| 22  | 24                    | 7.62 ± 0.10       | 100 ± 3              | 35                    | 7.45 ± 0.10       | >0.9999 | 118 ± 4              | 0.1214  | 25                    | 7.60 ± 0.15       | >0.9999 | 122 ± 6*             | 0.0527  | 15                    | 7.82 ± 0.14       | 0.9013  | 166 ± 8*             | <0.0001 |
| 23  | 30                    | 7.52 ± 0.19       | 100 ± 6              | 14                    | 7.86 ± 0.09       | 0.3327  | 99 ± 3               | >0.9999 | 13                    | 7.87 ± 0.11       | 0.2902  | 101 ± 3              | >0.9999 | 16                    | 7.79 ± 0.12       | 0.5659  | 116 ± 5              | 0.1078  |
| 24  | 31                    | 7.51 ± 0.15       | 100 ± 5              | 61                    | 7.22 ± 0.17       | 0.9439  | 141 ± 9              | 0.2169  | 40                    | 7.39 ± 0.21       | >0.9999 | 187 ± 14*            | 0.0069  | 236                   | 6.63 ± 0.24*      | 0.0368  | 195 ± 22*            | 0.004   |
| 25  | 18                    | 7.74 ± 0.15       | 100 ± 5              | 39                    | 7.41 ± 0.16       | 0.3392  | 120 ± 6              | 0.3196  | 82                    | 7.09 ± 0.09*      | 0.0257  | 170 ± 6*             | 0.0008  | 171                   | 6.77 ± 0.13*      | 0.0026  | 180 ± 12*            | 0.0003  |
| 12a | 55                    | 7.26 ± 0.09       | 100 ± 3              | 27                    | 7.56 ± 0.12       | 0.2171  | 103 ± 4              | >0.9999 | 47                    | 7.33 ± 0.11       | >0.9999 | 154 ± 7*             | 0.0022  | 214                   | 6.67 ± 0.09*      | 0.0116  | 258 ± 12*            | <0.0001 |
| 12b | 46                    | 7.34 ± 0.09       | 100 ± 3              | 17                    | 7.78 ± 0.19       | 0.275   | 148 ± 10             | 0.0729  | 10                    | 8.01 ± 0.15       | 0.058   | 237 ± 12*            | 0.0002  | 30                    | 7.52 ± 0.19       | >0.9999 | 248 ± 19*            | <0.0001 |
| 26  | 16                    | 7.78 ± 0.15       | 97 ± 5               | 25                    | 7.60 ± 0.18       | >0.9999 | 147 ± 9              | 0.0799  | 38                    | 7.42 ± 0.21       | 0.5935  | 219 ± 16*            | 0.0005  | 73                    | 7.14 ± 0.17       | 0.103   | 216 ± 17*            | 0.0006  |
| 27  | 26                    | 7.58 ± 0.15       | 98 ± 5               | 29                    | 7.53 ± 0.17       | >0.9999 | 141 ± 9*             | 0.0138  | 18                    | 7.74 ± 0.12       | >0.9999 | 187 ± 8*             | 0.0001  | 47                    | 7.32 ± 0.10       | 0.6499  | 182 ± 8*             | 0.0002  |
| 28  | 33                    | 7.48 ± 0.14       | 100 ± 5              | 59                    | 7.23 ± 0.26       | >0.9999 | 143 ± 14             | 0.1101  | 135                   | 6.87 ± 0.16       | 0.1601  | 180 ± 14*            | 0.0049  | 116                   | 6.94 ± 0.18       | 0.2343  | 154 ± 14*            | 0.0414  |
| 29  | 28                    | 7.55 ± 0.15       | 98 ± 5               | 35                    | 7.46 ± 0.18       | >0.9999 | 129 ± 9              | 0.1792  | 131                   | 6.88 ± 0.14*      | 0.0341  | 167 ± 12*            | 0.0035  | 400                   | 6.40 ± 0.10*      | 0.0014  | 182 ± 13*            | 0.001   |
| 30  | 75                    | 7.13 ± 0.18       | 99 ± 7               | 116                   | 6.94 ± 0.21       | >0.9999 | 131 ± 11             | 0.2819  | 99                    | 7.01 ± 0.20       | >0.9999 | 136 ± 11             | 0.1666  | 151                   | 6.82 ± 0.23       | 0.9736  | 145 ± 16             | 0.0727  |
| 31  | 29                    | 7.53 ± 0.14       | 98 ± 5               | 16                    | 7.79 ± 0.13       | 0.9184  | 119 ± 5              | 0.4999  | 44                    | 7.35 ± 0.22       | >0.9999 | 173 ± 14*            | 0.0019  | 79                    | 7.11 ± 0.16       | 0.3236  | 174 ± 12*            | 0.0018  |
| 32  | 43                    | 7.37 ± 0.17       | 100 ± 6              | 47                    | 7.33 ± 0.20       | >0.9999 | 110 ± 8              | >0.9999 | 220                   | 0.66 ± 0.23       | 0.1091  | 160 ± 16*            | 0.0265  | 527                   | 6.28 ± 0.20*      | 0.0146  | 151 ± 16             | 0.0587  |
| 33  | 47                    | 7.33 ± 0.17       | 99 ± 6               | 111                   | 6.96 ± 0.22       | 0.7729  | 132 ± 11             | 0.1678  | 85                    | 7.07 ± 0.31       | >0.9999 | 118 ± 14             | 0.7121  | 592                   | 6.23 ± 0.12*      | 0.0218  | 123 ± 8              | 0.4338  |
| 34  | 30                    | 7.53 ± 0.15       | 99 ± 5               | 92                    | 7.03 ± 0.18       | 0.2238  | 134 ± 10             | 0.1852  | 227                   | 6.64 ± 0.14*      | 0.0186  | 156 ± 10*            | 0.0215  | 853                   | 6.07 ± 0.20*      | 0.0009  | 113 ± 17             | >0.9999 |
| 35  | 59                    | 7.23 ± 0.15       | 100 ± 6              | 60                    | 7.22 ± 0.17       | >0.9999 | 136 ± 8              | 0.1022  | 39                    | 7.40 ± 0.15       | >0.9999 | 184 ± 9*             | 0.001   | 115                   | 6.94 ± 0.16       | 0.7023  | 206 ± 14*            | 0.0002  |
| 36  | 59                    | 7.23 ± 0.15       | 102 ± 6              | 118                   | 6.93 ± 0.24       | 0.9215  | 162 ± 16             | 0.0687  | 139                   | 6.86 ± 0.20       | 0.6385  | 207 ± 17*            | 0.0037  | 329                   | 6.48 ± 0.18       | 0.0796  | 212 ± 19*            | 0.0028  |
| 37  | 21                    | 7.68 ± 0.18       | 100 ± 6              | 31                    | 7.50 ± 0.15       | >0.9999 | 133 ± 6*             | 0.0444  | 27                    | 7.57 ± 0.19       | >0.9999 | 164 ± 10*            | 0.0009  | 24                    | 7.61 ± 0.14       | >0.9999 | 190 ± 8*             | <0.0001 |
| 38  | 39                    | 7.41 ± 0.22       | 97 ± 7               | 61                    | 7.21 ± 0.16       | >0.9999 | 131 ± 8              | 0.0809  | 108                   | 6.97 ± 0.20       | 0.3546  | 170 ± 12*            | 0.0012  | 40                    | 7.40 ± 0.13       | >0.9999 | 203 ± 8*             | <0.0001 |
| 39  | 67                    | 7.16 ± 0.15       | 98 ± 6               | 45                    | 7.35 ± 0.13       | 0.9238  | 158 ± 8*             | 0.0022  | 45                    | 7.34 ± 0.12       | 0.9803  | 223 ± 10*            | <0.0001 | 41                    | 7.39 ± 0.10       | 0.6941  | 215 ± 8*             | <0.0001 |

<sup>a</sup> Statistical significance was met when  $P \leq 0.05$  (One-way ANOVA with Bonferroni-adjusted T-test for multiple comparisons). Green highlight indicates a favorable change on agonist efficacy or potency, with respect to DMSO control for each compound, while yellow highlight indicates lower agonist affinity (higher EC<sub>50</sub>).

**Table S5.** ADMET properties calculated using the using the StarDrop software (v. 7.2), <https://www.optibrium.com/stardrop-installers/>.

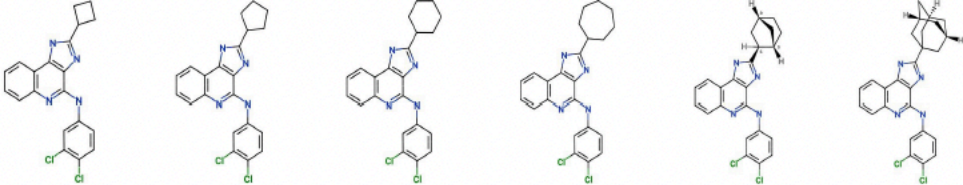

| Compound                 | 5        | 6        | 7        | 8        | 12a       | 12b       |
|--------------------------|----------|----------|----------|----------|-----------|-----------|
| logS                     | -0.1472  | -0.2683  | -0.4178  | -0.5228  | -0.5111   | -0.9844   |
| logS @ pH7.4             | -0.1472  | -0.2683  | -0.4178  | -0.5228  | -0.5111   | -0.9844   |
| logD                     | 5.616    | 5.936    | 6.42     | 6.75     | 6.206     | 6.068     |
| 2C9 pKi                  | 6.158    | 5.72     | 5.606    | 5.685    | 5.745     | 5.669     |
| hERG pIC50               | 6.07     | 6.19     | 6.331    | 6.454    | 6.214     | 6.294     |
| BBB log([brain]:[blood]) | -0.07797 | -0.06621 | -0.04728 | -0.03631 | -0.1347   | -0.187    |
| BBB category             | +        | +        | +        | +        | +         | +         |
| HIA category             | +        | +        | +        | +        | +         | +         |
| P-gp category            | yes      | yes      | yes      | yes      | yes       | yes       |
| 2D6 affinity category    | high     | high     | high     | high     | very high | very high |
| PPB90 category           | high     | high     | high     | high     | high      | high      |
| logP                     | 5.616    | 5.936    | 6.42     | 6.75     | 6.206     | 6.068     |
| MW                       | 383.3    | 397.3    | 411.3    | 425.4    | 423.3     | 463.4     |
| HBD                      | 2        | 2        | 2        | 2        | 2         | 2         |
| HBA                      | 4        | 4        | 4        | 4        | 4         | 4         |
| TPSA                     | 53.6     | 53.6     | 53.6     | 53.6     | 53.6      | 53.6      |
| Flexibility              | 0.1      | 0.09677  | 0.09375  | 0.09091  | 0.08824   | 0.07895   |
| Rotatable Bonds          | 3        | 3        | 3        | 3        | 3         | 3         |

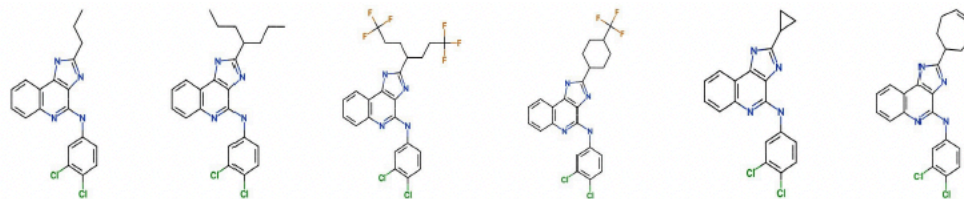

| Compound                        | 13       | 14      | 15      | 16       | 17       | 18      |
|---------------------------------|----------|---------|---------|----------|----------|---------|
| logS                            | 0.263    | -0.4833 | -0.4923 | -0.6356  | -0.01716 | -0.3941 |
| logS @ pH7.4                    | 0.263    | -0.4833 | -0.4923 | -0.6356  | -0.01716 | -0.3941 |
| logD                            | 5.408    | 6.94    | 6.232   | 6.392    | 5.287    | 6.169   |
| 2C9 pKi                         | 6.227    | 5.791   | 5.759   | 5.773    | 6.244    | 6.1     |
| hERG pIC50                      | 5.869    | 6.434   | 6.917   | 6.613    | 5.929    | 6.51    |
| BBB<br>log([brain]:[<br>blood]) | -0.09547 | 0.0547  | 0.05113 | -0.09645 | -0.09293 | 0.07324 |
| BBB<br>category                 | +        | +       | +       | +        | +        | +       |
| HIA<br>category                 | +        | +       | +       | +        | +        | +       |
| P-gp<br>category                | yes      | yes     | yes     | yes      | yes      | yes     |
| 2D6 affinity<br>category        | high     | high    | medium  | high     | high     | high    |
| PPB90<br>category               | high     | high    | high    | high     | high     | high    |
| logP                            | 5.408    | 6.94    | 6.232   | 6.392    | 5.287    | 6.169   |
| MW                              | 371.3    | 427.4   | 535.3   | 479.3    | 369.2    | 423.3   |
| HBD                             | 2        | 2       | 2       | 2        | 2        | 2       |
| HBA                             | 4        | 4       | 4       | 4        | 4        | 4       |
| TPSA                            | 53.6     | 53.6    | 53.6    | 53.6     | 53.6     | 53.6    |
| Flexibility                     | 0.1429   | 0.2188  | 0.2368  | 0.1111   | 0.1034   | 0.09091 |
| Rotatable<br>Bonds              | 4        | 7       | 9       | 4        | 3        | 3       |

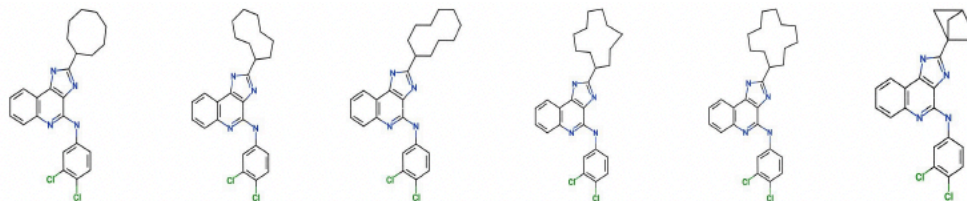

| Compound                    | 19       | 20       | 21       | 22       | 23       | 24      |
|-----------------------------|----------|----------|----------|----------|----------|---------|
| logS                        | -0.5902  | -0.6293  | -0.6825  | -0.7282  | -0.7668  | -0.448  |
| logS @ pH7.4                | -0.5902  | -0.6293  | -0.6825  | -0.7282  | -0.7668  | -0.448  |
| logD                        | 6.951    | 7.075    | 7.243    | 7.393    | 7.528    | 5.069   |
| 2C9 pKi                     | 5.618    | 5.534    | 5.627    | 5.653    | 5.67     | 6.121   |
| hERG pIC50                  | 6.564    | 6.666    | 6.768    | 6.867    | 6.961    | 5.888   |
| BBB<br>log([brain]:[blood]) | -0.03183 | -0.03255 | -0.03231 | -0.03382 | -0.03692 | -0.1525 |
| BBB category                | +        | +        | +        | +        | +        | +       |
| HIA category                | +        | +        | +        | +        | +        | +       |
| P-gp category               | yes      | yes      | yes      | yes      | yes      | yes     |
| 2D6 affinity category       | high     | high     | high     | high     | high     | high    |
| PPB90 category              | high     | high     | high     | high     | high     | high    |
| logP                        | 6.951    | 7.075    | 7.243    | 7.393    | 7.528    | 5.069   |
| MW                          | 439.4    | 453.4    | 467.4    | 481.5    | 495.5    | 395.3   |
| HBD                         | 2        | 2        | 2        | 2        | 2        | 2       |
| HBA                         | 4        | 4        | 4        | 4        | 4        | 4       |
| TPSA                        | 53.6     | 53.6     | 53.6     | 53.6     | 53.6     | 53.6    |
| Flexibility                 | 0.08824  | 0.08571  | 0.08333  | 0.08108  | 0.07895  | 0.09375 |
| Rotatable Bonds             | 3        | 3        | 3        | 3        | 3        | 3       |



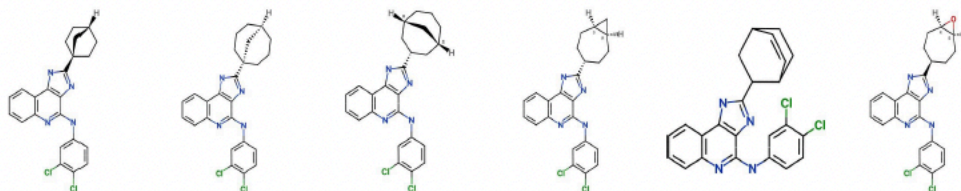

| Compound                 | 25      | 26      | 27        | 28        | 29        | 30        |
|--------------------------|---------|---------|-----------|-----------|-----------|-----------|
| logS                     | -0.6988 | -0.882  | -0.7376   | -0.6143   | -0.5777   | -0.522    |
| logS @ pH7.4             | -0.6988 | -0.882  | -0.7376   | -0.6143   | -0.5777   | -0.522    |
| logD                     | 5.593   | 6.074   | 6.789     | 6.535     | 6.303     | 5.861     |
| 2C9 pKi                  | 5.727   | 5.636   | 5.682     | 5.703     | 6.209     | 5.698     |
| hERG pIC50               | 6.225   | 6.458   | 6.423     | 6.375     | 6.468     | 6.121     |
| BBB log([brain]:[blood]) | -0.1496 | -0.1426 | -0.09721  | -0.09022  | 0.01895   | -0.2344   |
| BBB category             | +       | +       | +         | +         | +         | -         |
| HIA category             | +       | +       | +         | +         | +         | +         |
| P-gp category            | yes     | yes     | yes       | yes       | yes       | yes       |
| 2D6 affinity category    | high    | high    | very high | very high | very high | very high |
| PPB90 category           | high    | high    | high      | high      | high      | high      |
| logP                     | 5.593   | 6.074   | 6.789     | 6.535     | 6.303     | 5.861     |
| MW                       | 423.3   | 451.4   | 451.4     | 437.4     | 435.3     | 439.3     |
| HBD                      | 2       | 2       | 2         | 2         | 2         | 2         |
| HBA                      | 4       | 4       | 4         | 4         | 4         | 5         |
| TPSA                     | 53.6    | 53.6    | 53.6      | 53.6      | 53.6      | 66.13     |
| Flexibility              | 0.08824 | 0.08333 | 0.08333   | 0.08571   | 0.08571   | 0.08571   |
| Rotatable Bonds          | 3       | 3       | 3         | 3         | 3         | 3         |

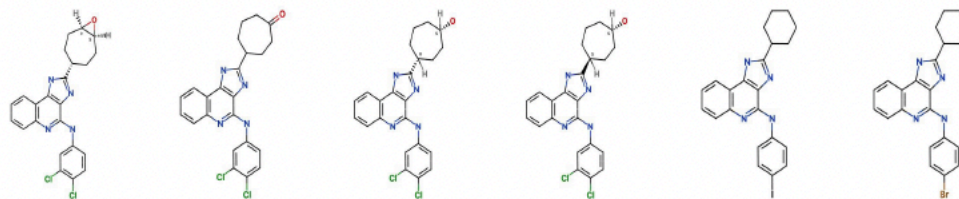

| Compound                 | 31        | 32      | 33      | 34      | 35       | 36       |
|--------------------------|-----------|---------|---------|---------|----------|----------|
| logS                     | -0.522    | -0.7006 | -0.2016 | -0.2016 | -0.0425  | 0.2806   |
| logS @ pH7.4             | -0.522    | -0.7006 | -0.2016 | -0.2016 | -0.0425  | 0.2806   |
| logD                     | 5.861     | 5.219   | 5.533   | 5.533   | 5.794    | 5.922    |
| 2C9 pKi                  | 5.698     | 5.986   | 5.584   | 5.584   | 5.458    | 5.458    |
| hERG pIC50               | 6.121     | 6.129   | 6.196   | 6.196   | 6.531    | 6.534    |
| BBB log([brain]:[blood]) | -0.2344   | -0.3541 | -0.4418 | -0.4418 | -0.03721 | -0.02661 |
| BBB category             | -         | -       | -       | -       | +        | +        |
| HIA category             | +         | +       | +       | +       | +        | +        |
| P-gp category            | yes       | yes     | yes     | yes     | yes      | yes      |
| 2D6 affinity category    | very high | high    | high    | high    | high     | high     |
| PPB90 category           | high      | high    | high    | high    | high     | high     |
| logP                     | 5.861     | 5.219   | 5.533   | 5.533   | 5.794    | 5.922    |
| MW                       | 439.3     | 439.3   | 441.4   | 441.4   | 468.3    | 421.3    |
| HBD                      | 2         | 2       | 3       | 3       | 2        | 2        |
| HBA                      | 5         | 5       | 5       | 5       | 4        | 4        |
| TPSA                     | 66.13     | 70.67   | 73.83   | 73.83   | 53.6     | 53.6     |
| Flexibility              | 0.08571   | 0.08824 | 0.08824 | 0.08824 | 0.09677  | 0.09677  |
| Rotatable Bonds          | 3         | 3       | 3       | 3       | 3        | 3        |

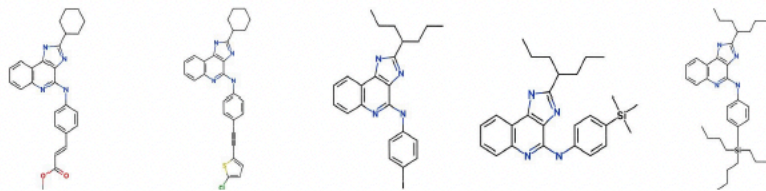

| Compound                        | 37      | 38      | 39      | 48     | 49      |
|---------------------------------|---------|---------|---------|--------|---------|
| logS                            | 0.3498  | -1.215  | -0.1055 | 0.2823 | -0.8281 |
| logS @ pH7.4                    | 0.3498  | -1.215  | -0.1055 | 0.2823 | -0.8281 |
| logD                            | 5.123   | 6.705   | 6.262   | 6.527  | 9.4     |
| 2C9 pKi                         | 5.397   | 5.81    | 5.606   | 5.607  | 5.485   |
| hERG pIC50                      | 6.35    | 6.761   | 6.634   | 6.61   | 7.772   |
| BBB<br>log([brain]:[<br>blood]) | -0.4501 | -0.5372 | 0.04793 | 0.056  | 0.09369 |
| BBB<br>category                 | -       | +       | +       | +      | +       |
| HIA<br>category                 | +       | +       | +       | +      | +       |
| P-gp<br>category                | yes     | yes     | yes     | yes    | yes     |
| 2D6 affinity<br>category        | high    | high    | high    | high   | high    |
| PPB90<br>category               | high    | high    | high    | high   | high    |
| logP                            | 5.123   | 6.705   | 6.262   | 6.527  | 9.4     |
| MW                              | 426.5   | 483     | 484.4   | 430.7  | 556.9   |
| HBD                             | 2       | 2       | 2       | 2      | 2       |
| HBA                             | 6       | 4       | 4       | 4      | 4       |
| TPSA                            | 79.9    | 53.6    | 53.6    | 53.6   | 53.6    |
| Flexibility                     | 0.1667  | 0.1282  | 0.2258  | 0.2353 | 0.3953  |
| Rotatable<br>Bonds              | 6       | 5       | 7       | 8      | 17      |

## PDSP Screening

Off-target analysis of select PAM derivatives with forty-five other receptors, transporters, and channels was determined using radioligand binding assays by Psychoactive Drug Screening Program (PDSP). We thank Dr. Bryan L. Roth (Univ. North Carolina at Chapel Hill) and National Institute of Mental Health's Psychoactive Drug Screening Program (Contract # HHSN-271-2008-00025-C) for screening data.<sup>4</sup> Procedures:

<https://pdsp.unc.edu/pdspweb/content/UNC-CH%20Protocol%20Book.pdf>. Unless noted in the text, no significant interactions (<50% inhibition at 10  $\mu$ M) for any of the nucleosides were found at the following sites (human unless noted): 5HT<sub>1A</sub>, 5HT<sub>1B</sub>, 5HT<sub>1D</sub>, 5HT<sub>1E</sub>, 5HT<sub>2A</sub>, 5HT<sub>2B</sub>, 5HT<sub>2C</sub>, 5HT<sub>3</sub>, 5HT<sub>5A</sub>, 5HT<sub>6</sub>, 5HT<sub>7</sub>,  $\alpha_{1A}$ ,  $\alpha_{1B}$ ,  $\alpha_{1D}$ ,  $\alpha_{2A}$ ,  $\alpha_{2B}$ ,  $\alpha_{2C}$ ,  $\beta_1$ ,  $\beta_2$ ,  $\beta_3$ , BZP rat brain site, D<sub>1</sub>, D<sub>2</sub>, D<sub>3</sub>, D<sub>4</sub>, D<sub>5</sub>, GABA<sub>A</sub>, H<sub>1</sub>, H<sub>2</sub>, H<sub>3</sub>, H<sub>4</sub>, M<sub>1</sub>, M<sub>2</sub>, M<sub>5</sub>,  $\delta$ -opioid receptor (DOR),  $\kappa$ -opioid receptor (KOR),  $\mu$ -opioid receptor (MOR),  $\sigma_1$ ,  $\sigma_2$ , DAT, NET, SERT. K<sub>i</sub> values in  $\mu$ M (Table 2), or % inhibition at 10  $\mu$ M (not shown), were determined.

**Table S6.** In vivo experimental PK determination using Wistar rats.

|                                   |                                      |                                         |                 |                  |
|-----------------------------------|--------------------------------------|-----------------------------------------|-----------------|------------------|
| <b>Dose (mg/kg, route)</b>        | <b>0.5 (i.v.)</b>                    | <b>1 (p.o.)</b>                         | <b>3 (p.o.)</b> | <b>10 (p.o.)</b> |
| <b>Species of Strain</b>          | Rat and RccHan:WIST                  |                                         |                 |                  |
| <b>N mice</b>                     | 3                                    | 3                                       | 3               | 3                |
| <b>Feeding Condition</b>          | Fed                                  | Fasting overnight, feed 4 h post-dosing |                 |                  |
| <b>Dose Volume (mg/kg b. wt.)</b> | 5                                    |                                         |                 |                  |
| <b>Concentration (mg/mL)</b>      | 0.1                                  | 0.2                                     | 0.6             | 2                |
| <b>Vehicles</b>                   | DMSO: 20% HPBCD (10:90)              | DMSO: Kolliphor EL: PBS (15:15:70)      |                 |                  |
| <b>Blood Collection Site</b>      | Jugular vein through a catheter      |                                         |                 |                  |
| <b>Anticoagulant</b>              | Heparin (20 IU/mL)                   |                                         |                 |                  |
| <b>Time Points (h)</b>            | 0.083, 0.25, 0.5, 1, 2, 4, 8, 12, 24 | 0.25, 0.5, 1, 2, 4, 8, 12, 24           |                 |                  |

**Table S7.** Caco-2 permeability results of compounds **18** and **39**.

| <b>Compound Name</b> | <b>Average Values</b>               |               |                     |                          |                          | <b>Classification</b> |
|----------------------|-------------------------------------|---------------|---------------------|--------------------------|--------------------------|-----------------------|
|                      | <b>Papp (10<sup>6</sup> cm/sec)</b> |               | <b>Efflux Ratio</b> | <b>A to B % Recovery</b> | <b>B to A % Recovery</b> |                       |
|                      | <b>A to B</b>                       | <b>B to A</b> |                     |                          |                          |                       |
| <b>18</b>            | 0.00                                | 0.00          | NC                  | 48.1                     | 78.0                     | Low                   |
| <b>39</b>            | 0.00                                | 0.01          | NC                  | 61.7                     | 76.7                     | Low                   |
| <b>Digoxin</b>       | 0.13                                | 9.96          | 74.2                | 82.0                     | 84.2                     | Low                   |
| <b>Propranolol</b>   | 28.4                                | 17.6          | 0.62                | 74.4                     | 101                      | High                  |
| <b>Atenolol</b>      | 0.00                                | 0.00          | NC                  | 87.8                     | 86.1                     | Low                   |

**Table S8.** In vivo pharmacokinetic parameters of compounds **18** and **39**.**A) compound 18**

| <b>Dose (Route)</b>     | <b>C<sub>max</sub> (ng/mL)</b> | <b>T<sub>max</sub> (h)</b> | <b>AUC<sub>0-last</sub> (h*ng/mL)</b> | <b>AUC<sub>0-∞</sub> (h*ng/mL)</b> | <b>T<sub>1/2</sub> (h)</b> | <b>MRT<sub>last</sub> (h)</b> | <b>V<sub>d</sub> (mL/kg)</b> | <b>k<sub>el</sub> (1/h)</b> | <b>F (%)</b> | <b>Cl (mL/h/kg)</b> |
|-------------------------|--------------------------------|----------------------------|---------------------------------------|------------------------------------|----------------------------|-------------------------------|------------------------------|-----------------------------|--------------|---------------------|
| <b>0.5 mg/kg (i.v.)</b> | 696                            | 0.083                      | 1080                                  | 1120                               | 2.38                       | 2.64                          | 1530                         | 0.292                       | 100          | 447                 |
| <b>1 mg/kg (p.o.)</b>   | 185                            | 2.00                       | ND                                    | ND                                 | ND                         | ND                            | ND                           | ND                          | ND           | ND                  |
| <b>3 mg/kg (p.o.)</b>   | 487                            | 2.00                       | 1860                                  | 1900                               | 1.29                       | 3.01                          | 2930                         | 0.539                       | 28.7         | 1580                |
| <b>10 mg/kg (p.o.)</b>  | 1780                           | 2.00                       | 10,200                                | 10,300                             | 2.60                       | 3.98                          | 3660                         | 0.266                       | 47.5         | 975                 |

ND, not determined.

**B) compound 39**

| <b>Dose (Route)</b>     | <b>C<sub>max</sub> (ng/mL)</b> | <b>T<sub>max</sub> (h)</b> | <b>AUC<sub>0-last</sub> (h*ng/mL)</b> | <b>AUC<sub>0-∞</sub> (h*ng/mL)</b> | <b>T<sub>1/2</sub> (h)</b> | <b>MRT<sub>last</sub> (h)</b> | <b>V<sub>d</sub> (mL/kg)</b> | <b>k<sub>el</sub> (1/h)</b> | <b>F (%)</b> | <b>Cl (mL/h/kg)</b> |
|-------------------------|--------------------------------|----------------------------|---------------------------------------|------------------------------------|----------------------------|-------------------------------|------------------------------|-----------------------------|--------------|---------------------|
| <b>0.5 mg/kg (i.v.)</b> | 530                            | 0.083                      | 841                                   | 881                                | 6.91                       | 4.09                          | 5660                         | 0.100                       | 100          | 568                 |
| <b>1 mg/kg (p.o.)</b>   | 142                            | 1.000                      | 767                                   | 778                                | 4.71                       | 4.41                          | 8730                         | 0.147                       | 44.2         | 1280                |
| <b>3 mg/kg (p.o.)</b>   | 592                            | 2.000                      | 3350                                  | 3380                               | 3.44                       | 5.62                          | 4400                         | 0.207                       | 64.0         | 886                 |
| <b>10 mg/kg (p.o.)</b>  | 1040                           | 4.000                      | 10,600                                | 10,800                             | 3.84                       | 7.35                          | 5110                         | 0.180                       | 61.5         | 923                 |

## NMR Spectra

The NMR Spectra below were acquired on a Bruker ADIII-400 at 298 °K in CDCl<sub>3</sub> plus 4 drops of MeOD.

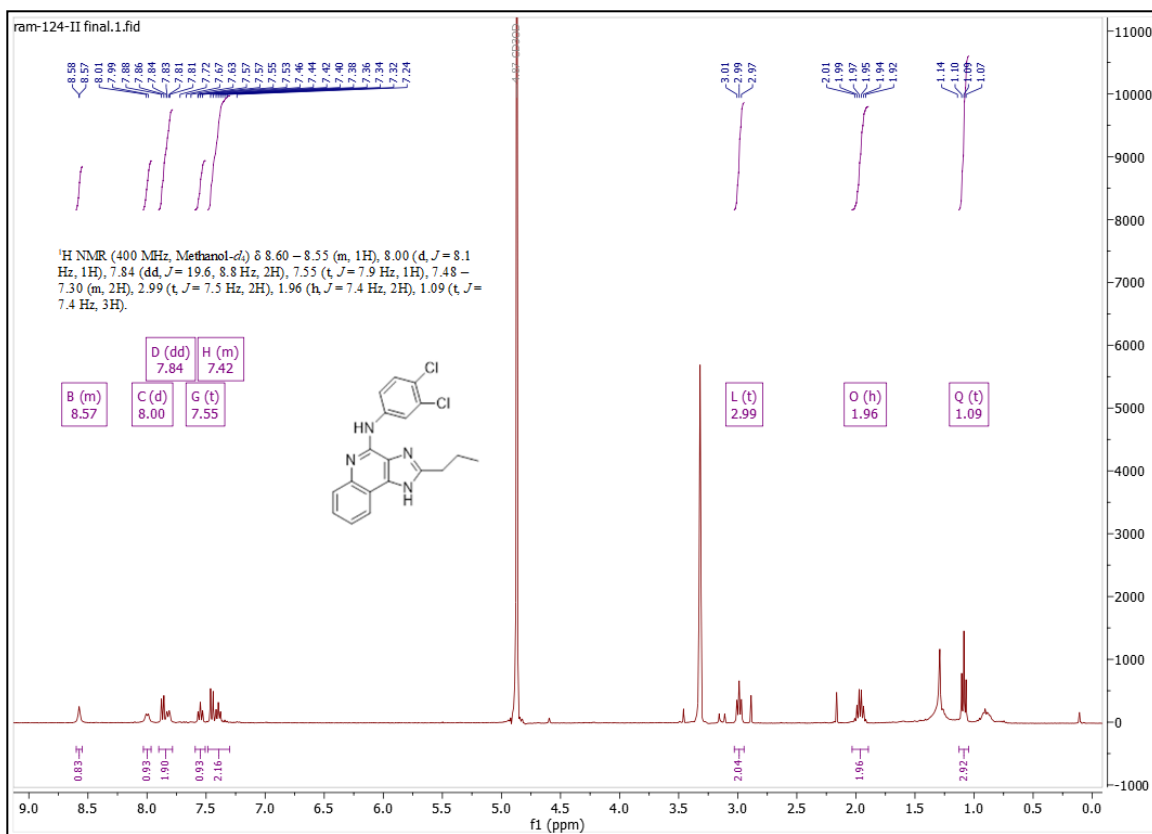

<sup>1</sup>H NMR of 2-ethyl-*N*-(3,4-dichlorophenyl)-1*H*-imidazo[4,5-*c*]quinolin-4-amine – Compound **13**.

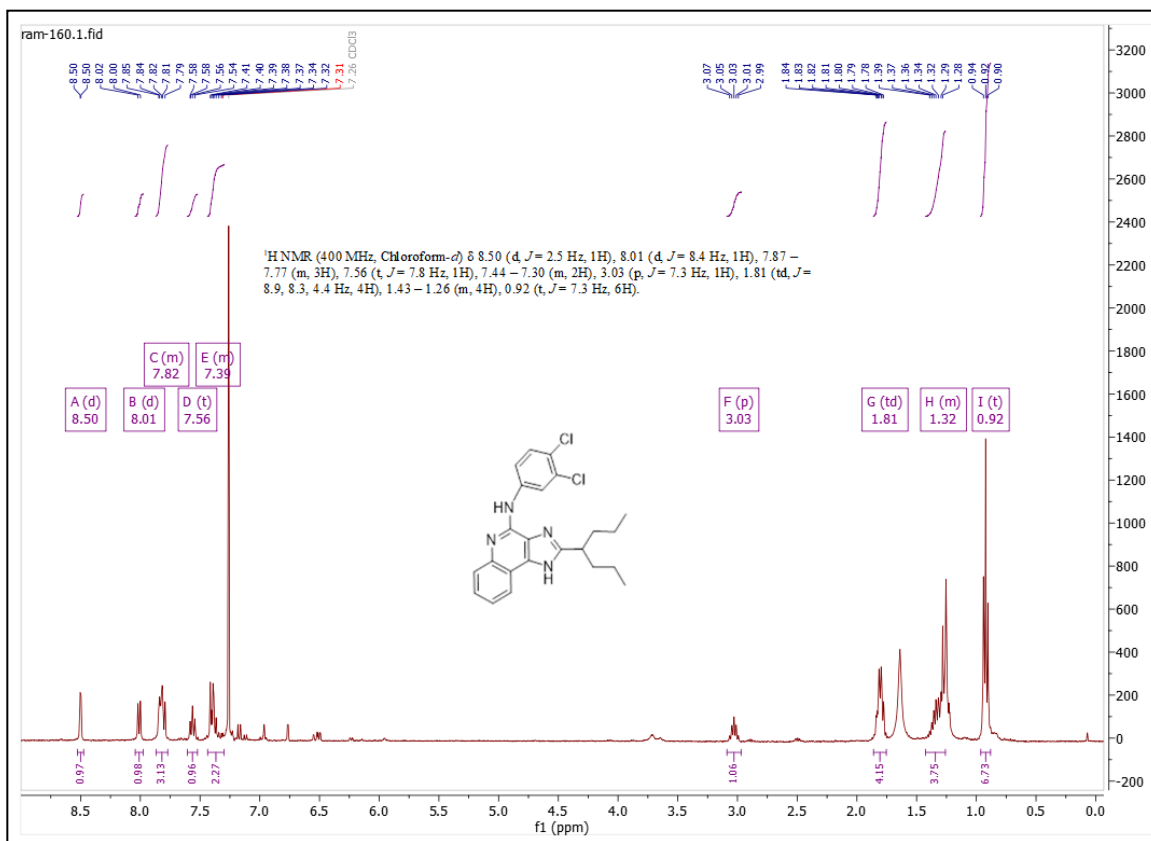

<sup>1</sup>H NMR of 2-(heptan-4-yl)-*N*-(3,4-dichlorophenyl)-1*H*-imidazo[4,5-*c*]quinolin-4-amine – Compound **14**.



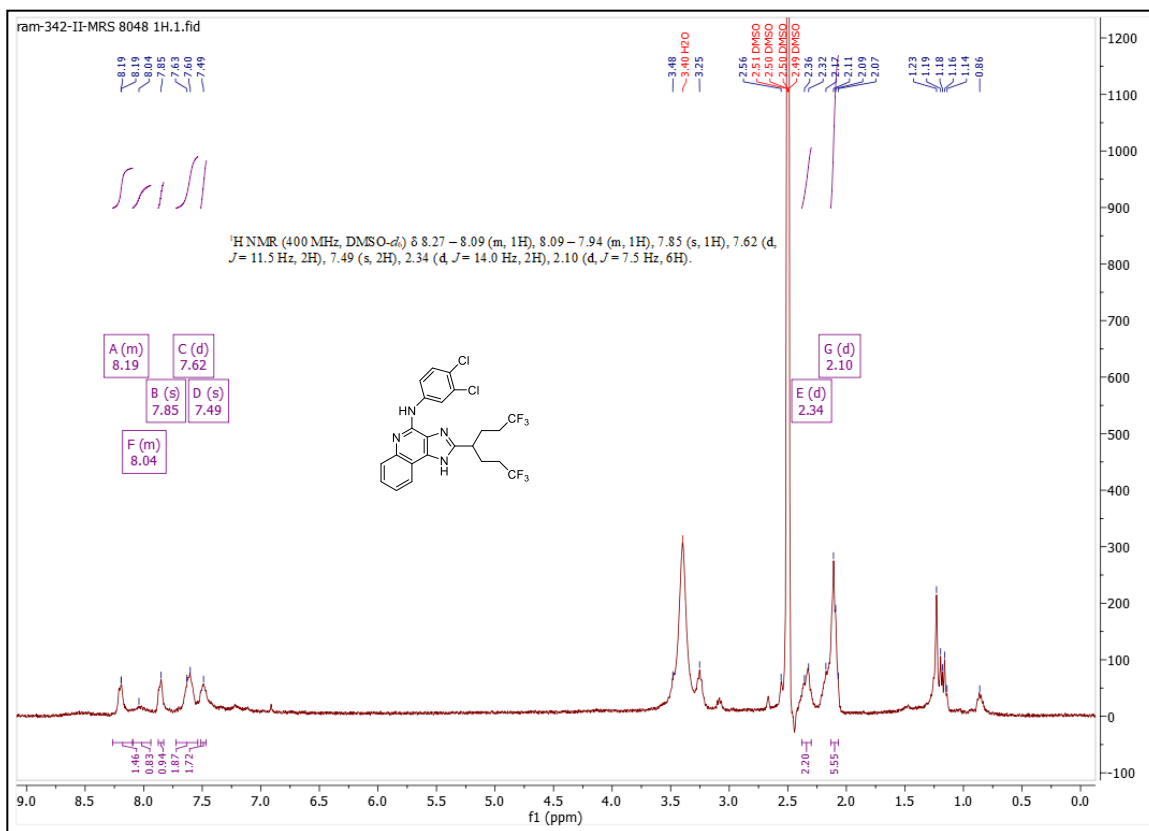

$^1\text{H NMR}$  of 2-(1,1,1,7,7,7-hexafluoroheptan-4-yl)-*N*-(3,4-dichlorophenyl)-1*H*-imidazo[4,5-*c*]quinolin-4-amine – Compound **15**.

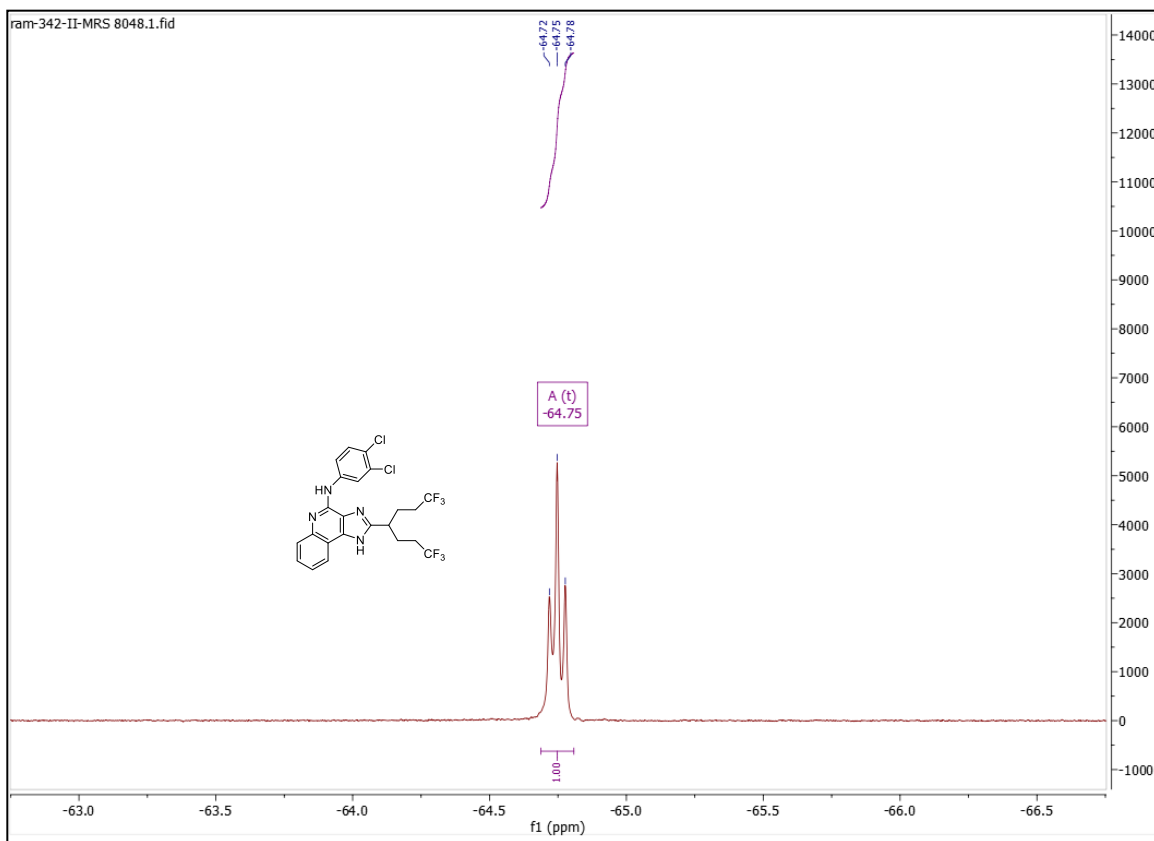

$^{19}\text{F}$  NMR of 2-(1,1,1,7,7,7-hexafluoroheptan-4-yl)-N-(3,4-dichlorophenyl)-1H-imidazo[4,5-c]quinolin-4-amine – Compound **15**.

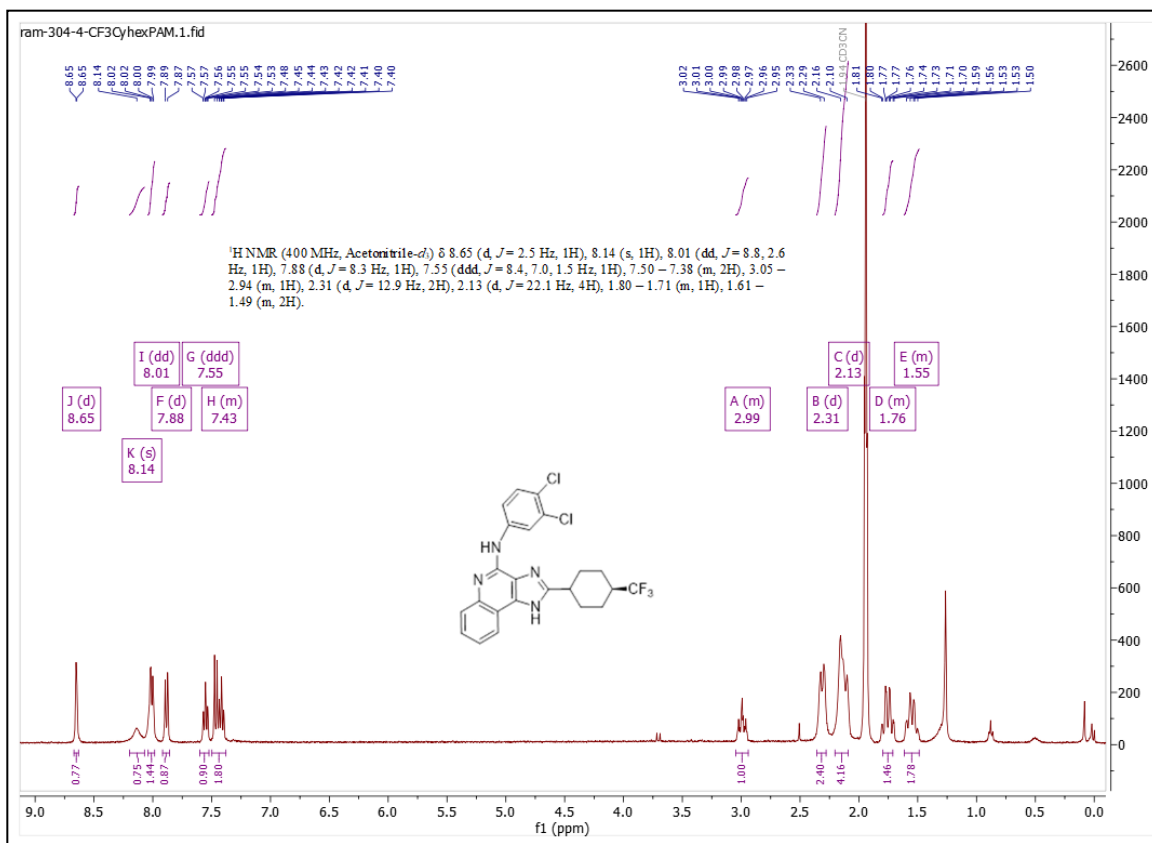

<sup>1</sup>H NMR of 2-(4-(trifluoromethyl)cyclohexyl)-*N*-(3,4-dichlorophenyl)-1*H*-imidazo[4,5-*c*]quinolin-4-amine – Compound **16**.

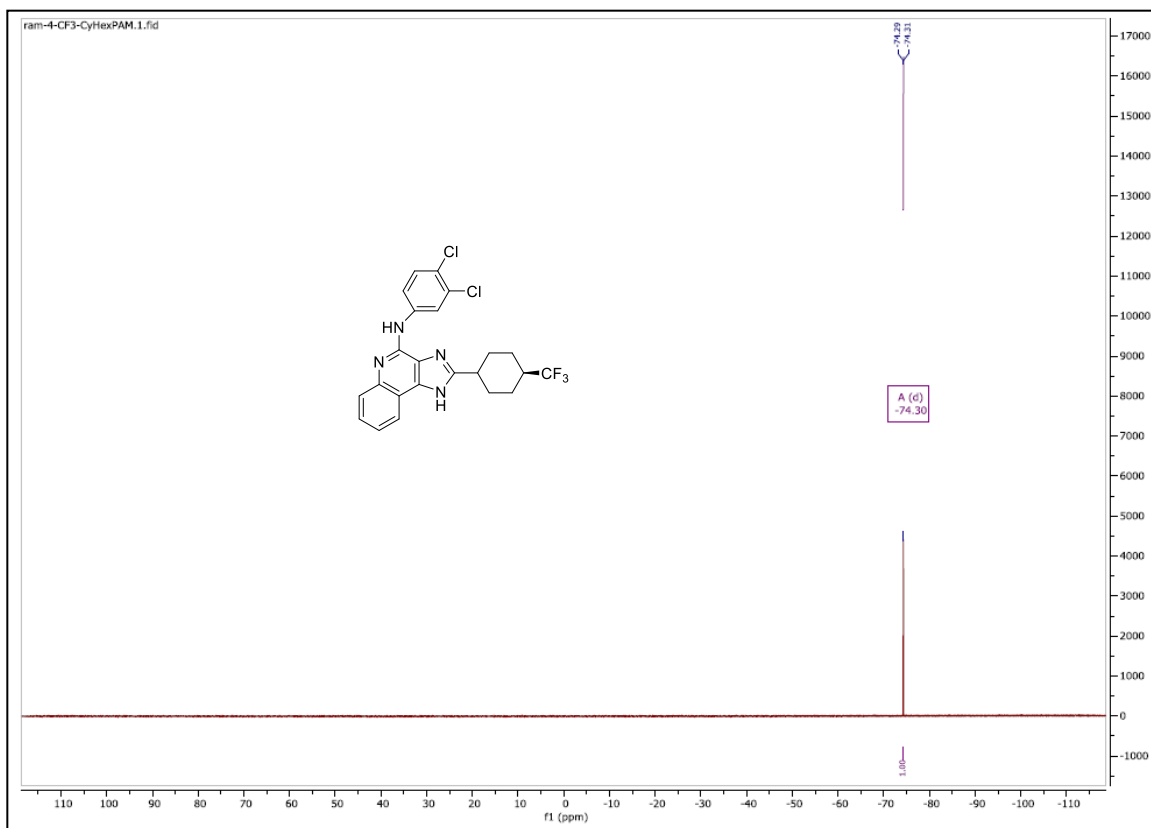

$^{19}\text{F}$  NMR of 2-(4-(trifluoromethyl)cyclohexyl)-*N*-(3,4-dichlorophenyl)-1*H*-imidazo[4,5-*c*]quinolin-4-amine – Compound **16**.

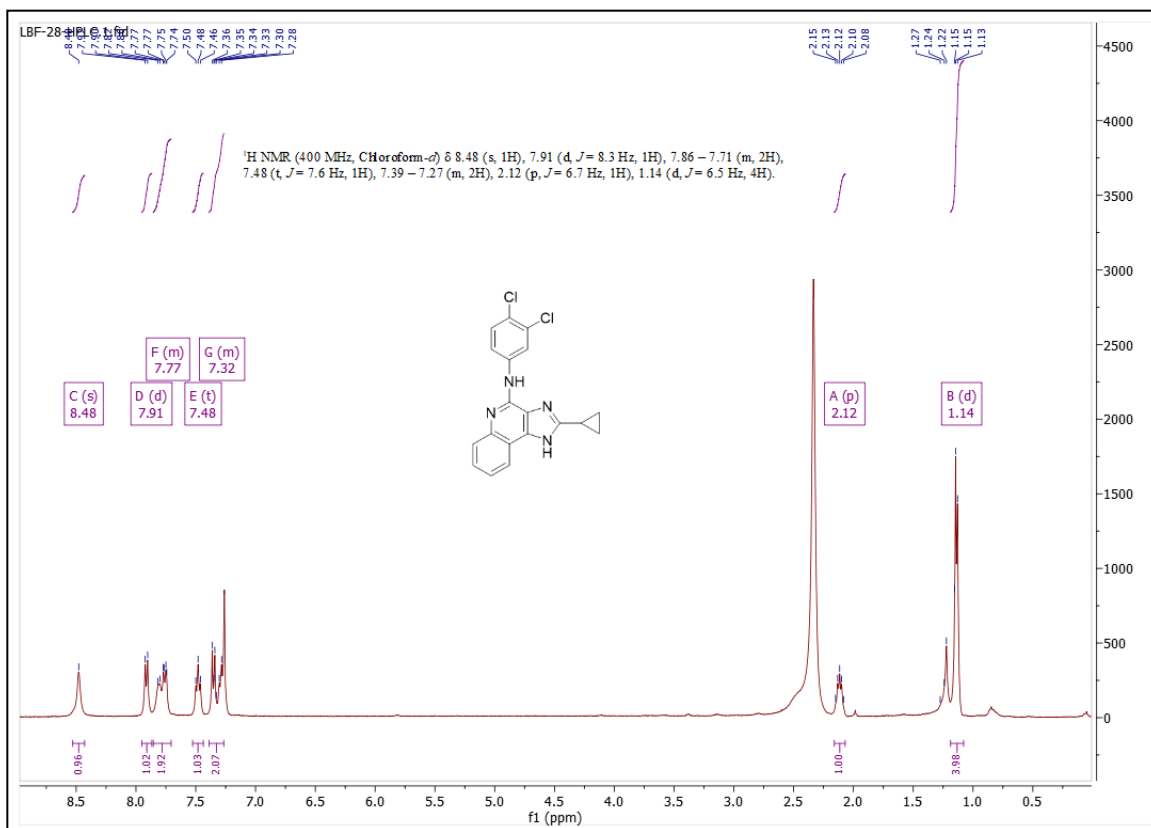

<sup>1</sup>H NMR of 2-(cyclopropyl)-*N*-(3,4-dichlorophenyl)-1*H*-imidazo[4,5-*c*]quinolin-4-amine – Compound **17**.

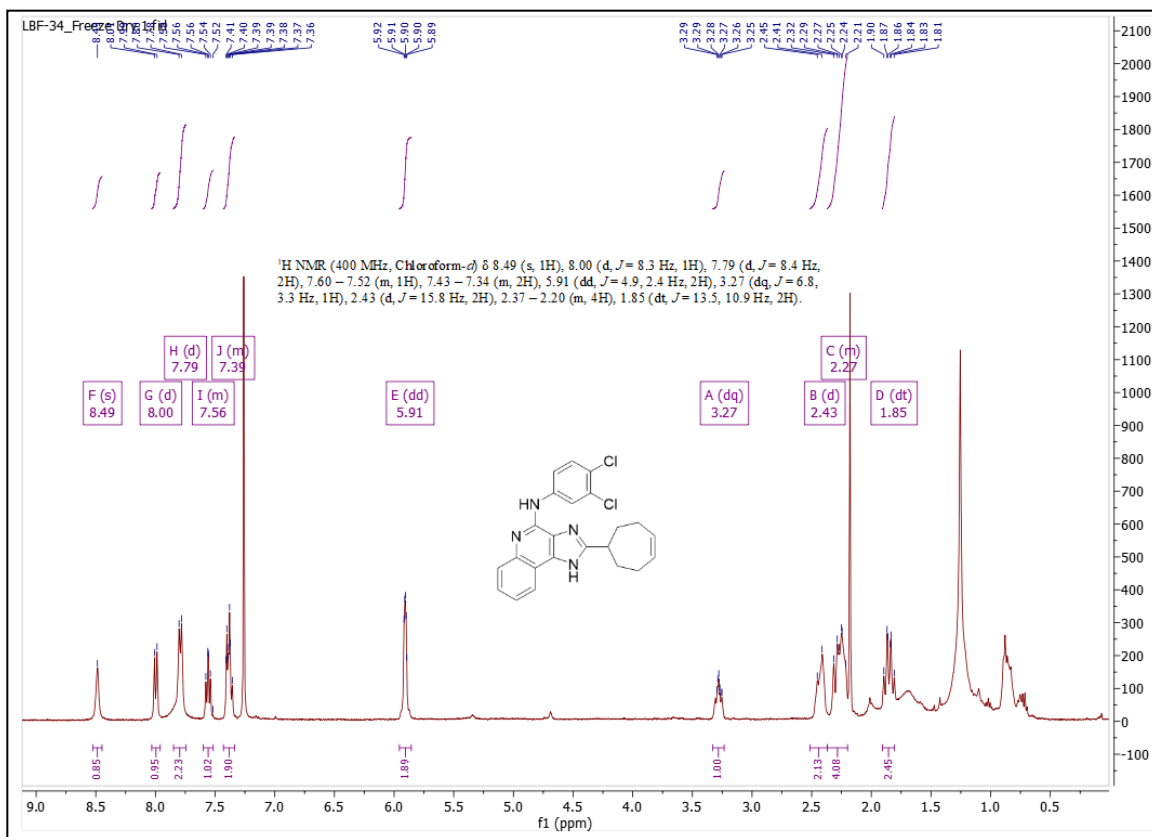

<sup>1</sup>H NMR of 2-(cyclohept-4-en-1-yl)-*N*-(3,4-dichlorophenyl)-1*H*-imidazo[4,5-*c*]quinolin-4-amine – Compound **18**.

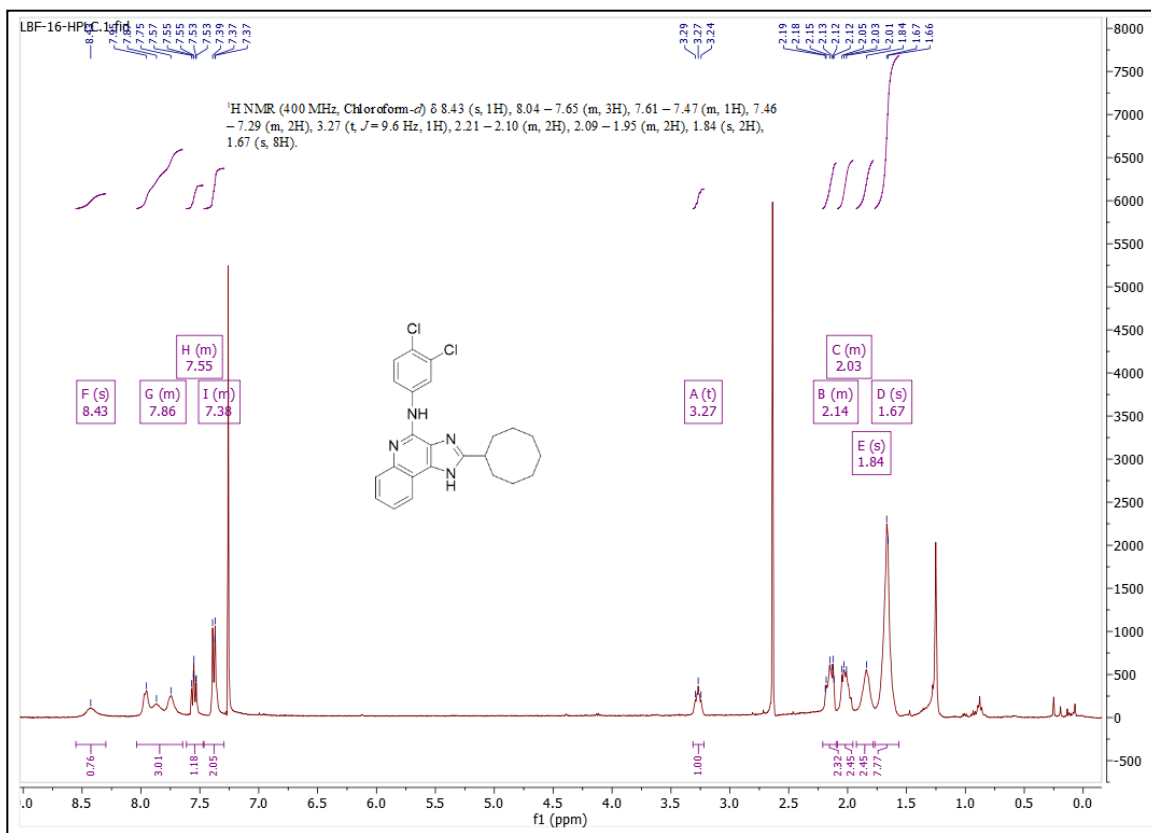

<sup>1</sup>H NMR of 2-(cyclooctyl)-*N*-(3,4-dichlorophenyl)-1*H*-imidazo[4,5-*c*]quinolin-4-amine – Compound **19**.

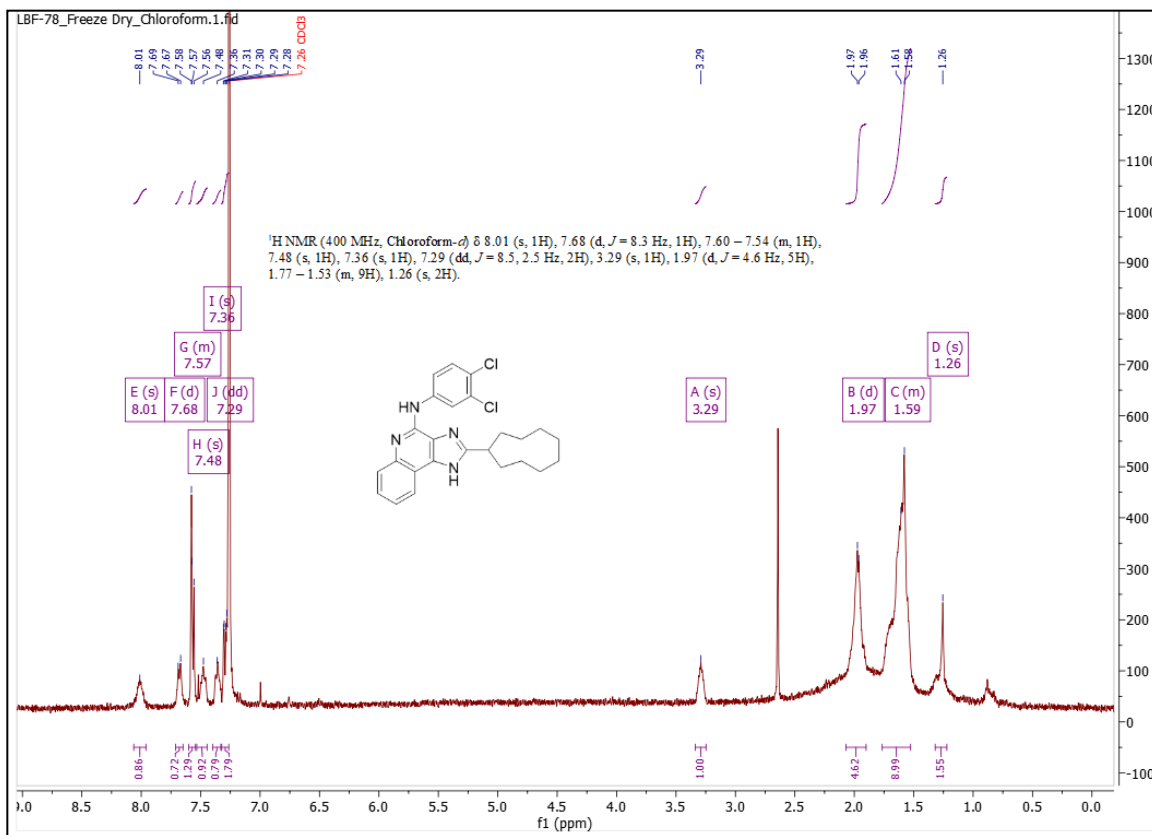

<sup>1</sup>H NMR of 2-(cyclononyl)-*N*-(3,4-dichlorophenyl)-1*H*-imidazo[4,5-*c*]quinolin-4-amine – Compound **20**.



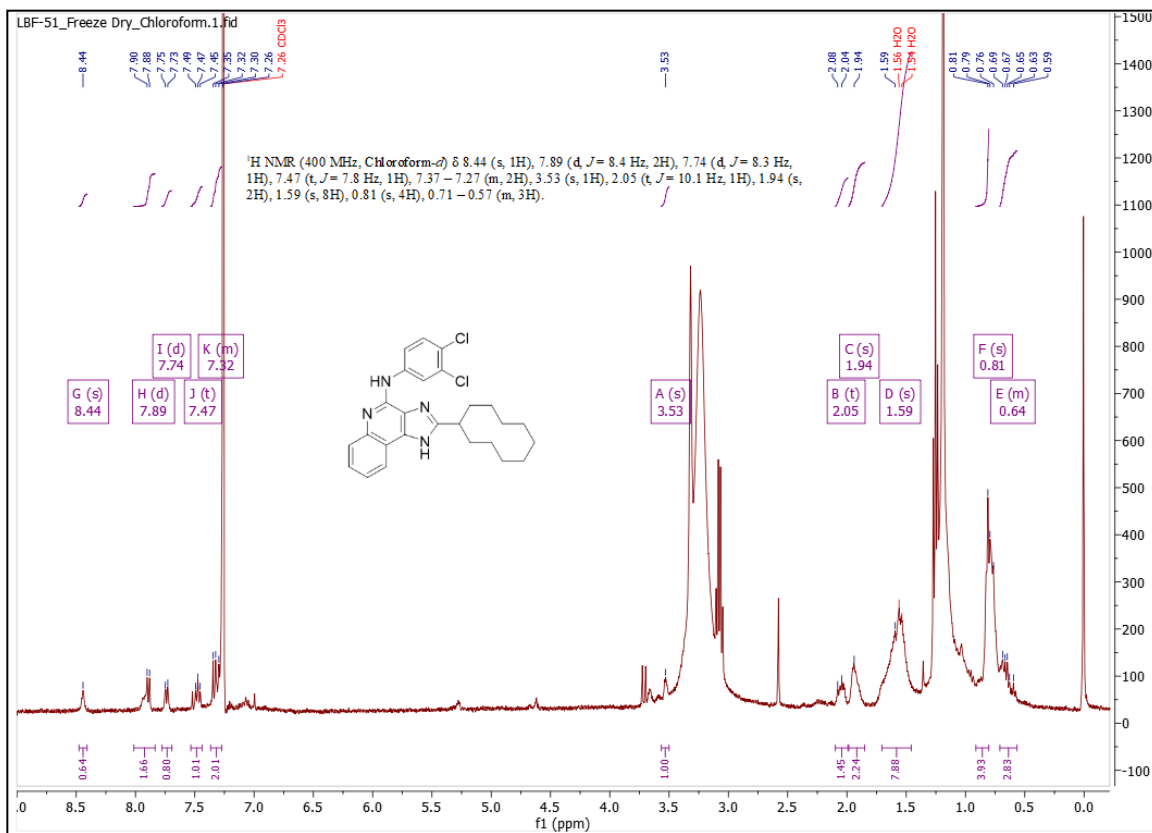

<sup>1</sup>H NMR of 2-(cyclodecyl)-*N*-(3,4-dichlorophenyl)-1*H*-imidazo[4,5-*c*]quinolin-4-amine – Compound **21**.

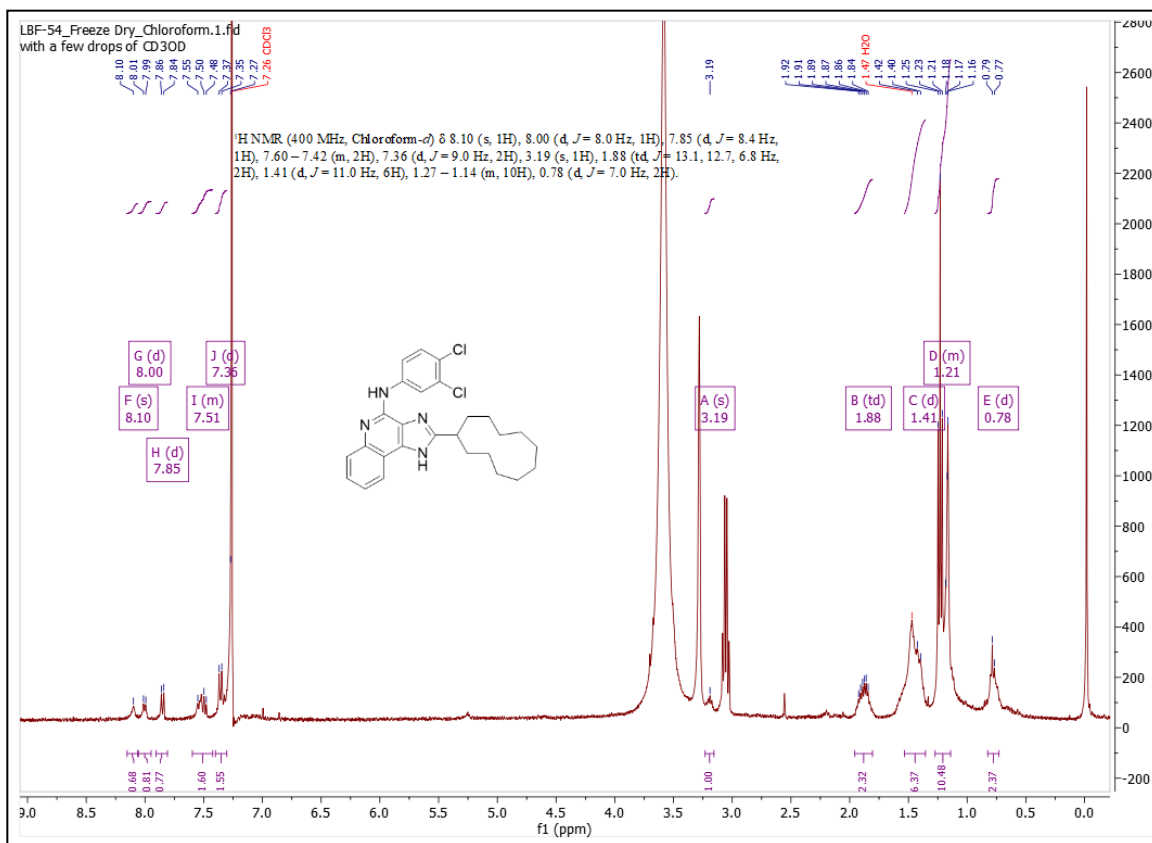

<sup>1</sup>H NMR of 2-(cycloundecyl)-*N*-(3,4-dichlorophenyl)-1*H*-imidazo[4,5-*c*]quinolin-4-amine – Compound **22**.

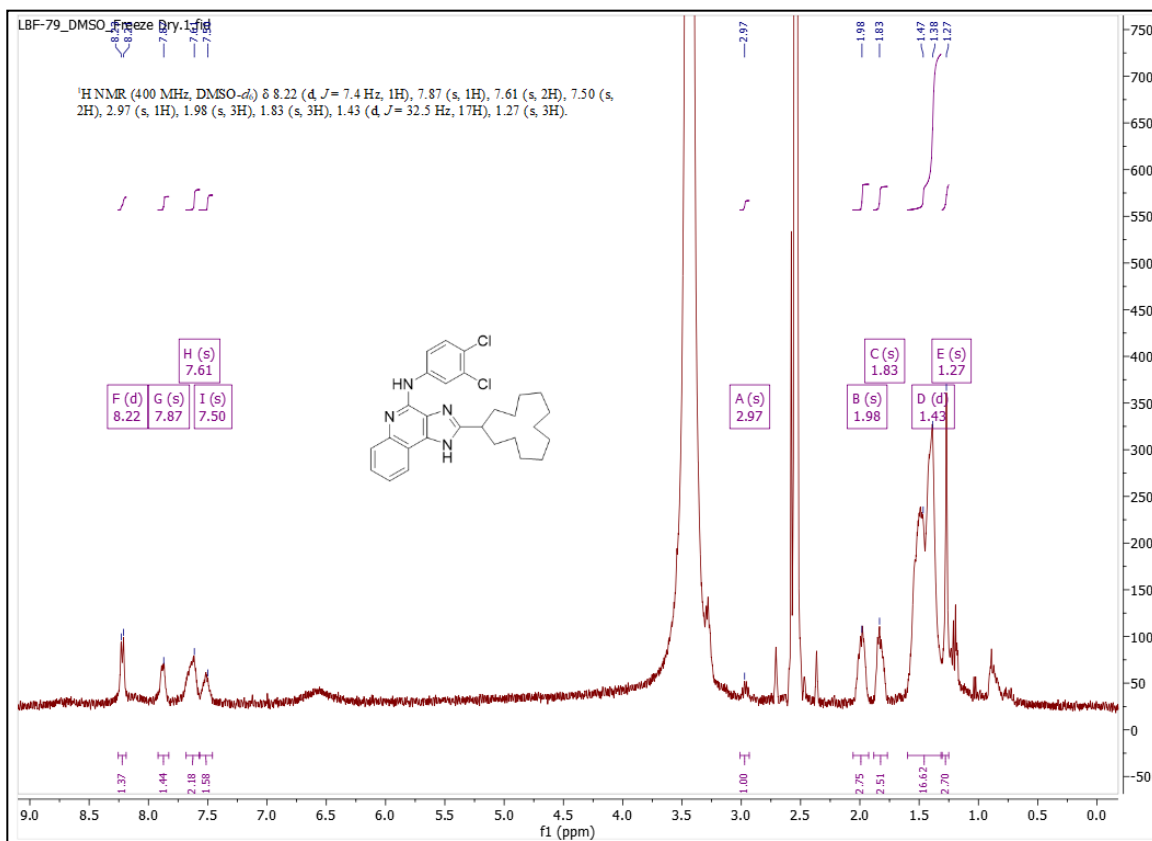

<sup>1</sup>H NMR of 2-(cyclododecyl)-*N*-(3,4-dichlorophenyl)-1*H*-imidazo[4,5-*c*]quinolin-4-amine – Compound **23**.

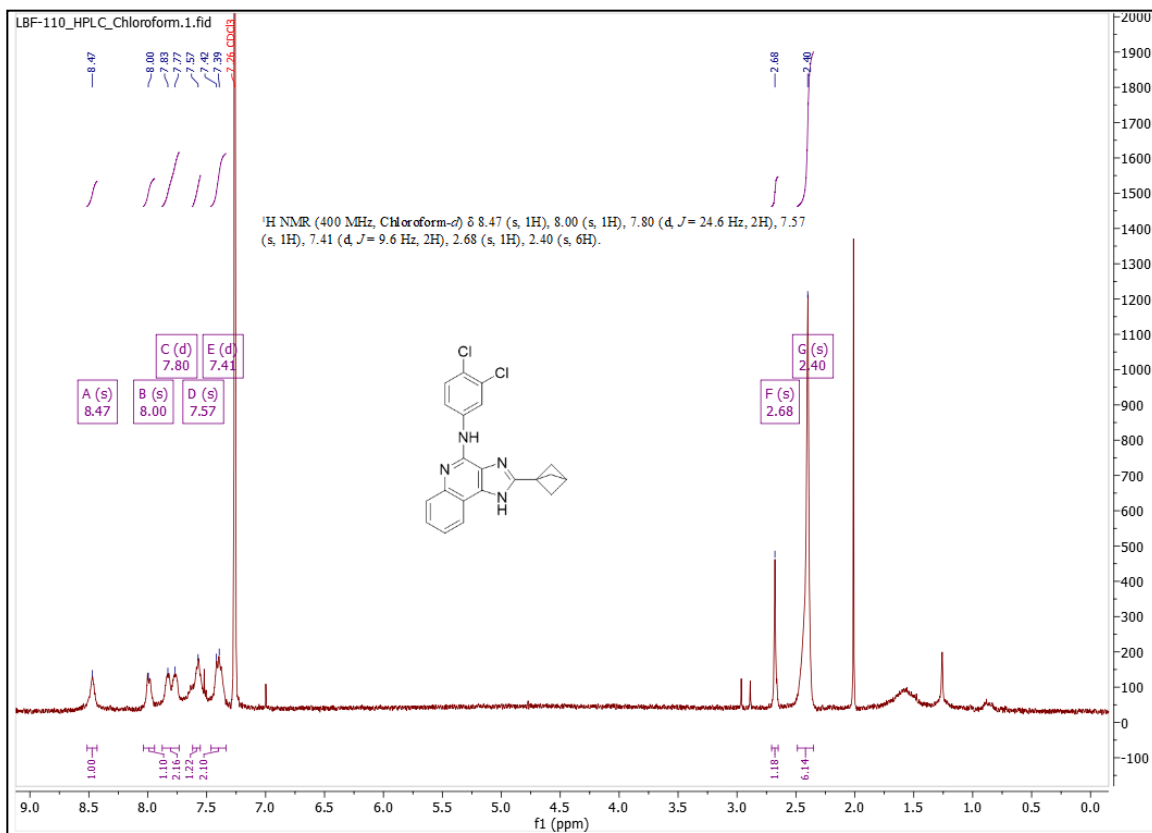

<sup>1</sup>H NMR of 2-(bicyclo[1.1.1]heptan-1-yl)-*N*-(3,4-dichlorophenyl)-1*H*-imidazo[4,5-*c*]quinolin-4-amine – Compound **24**.

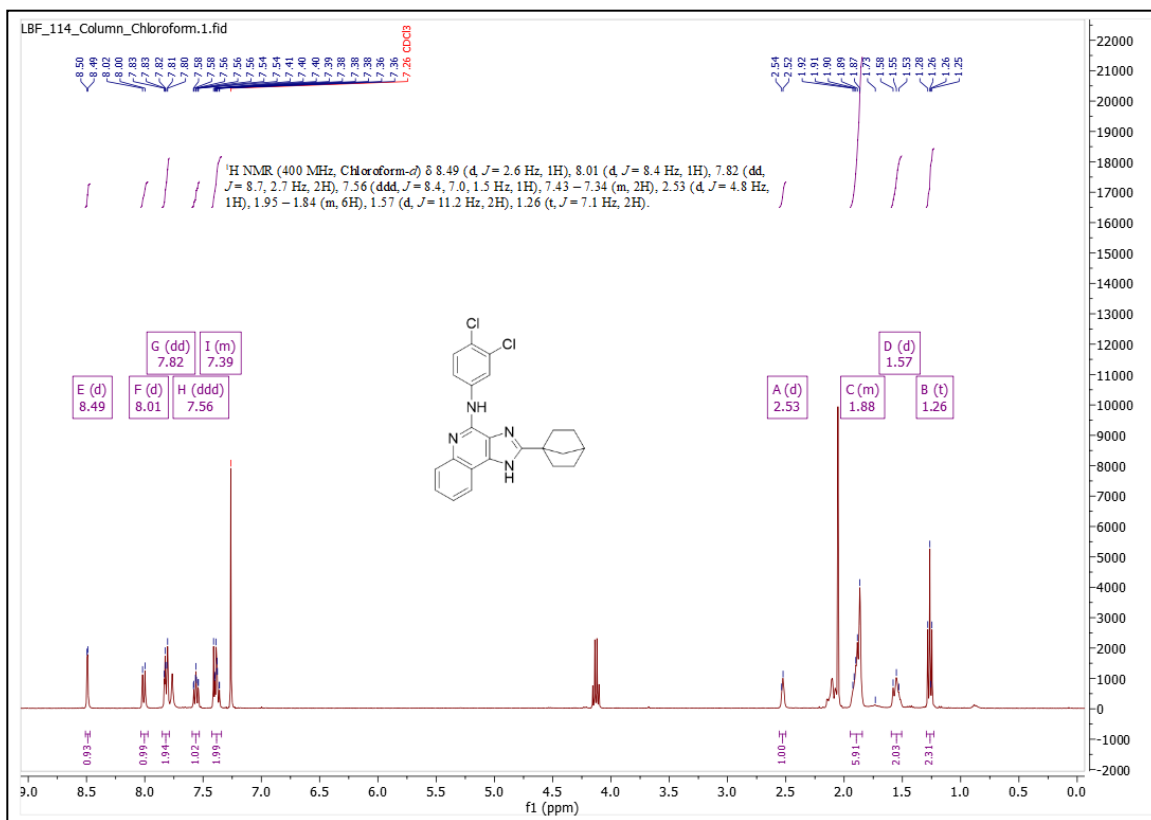

<sup>1</sup>H NMR of 2-(bicyclo[2.2.1]heptan-1-yl)-*N*-(3,4-dichlorophenyl)-1*H*-imidazo[4,5-*c*]quinolin-4-amine – Compound **25**.

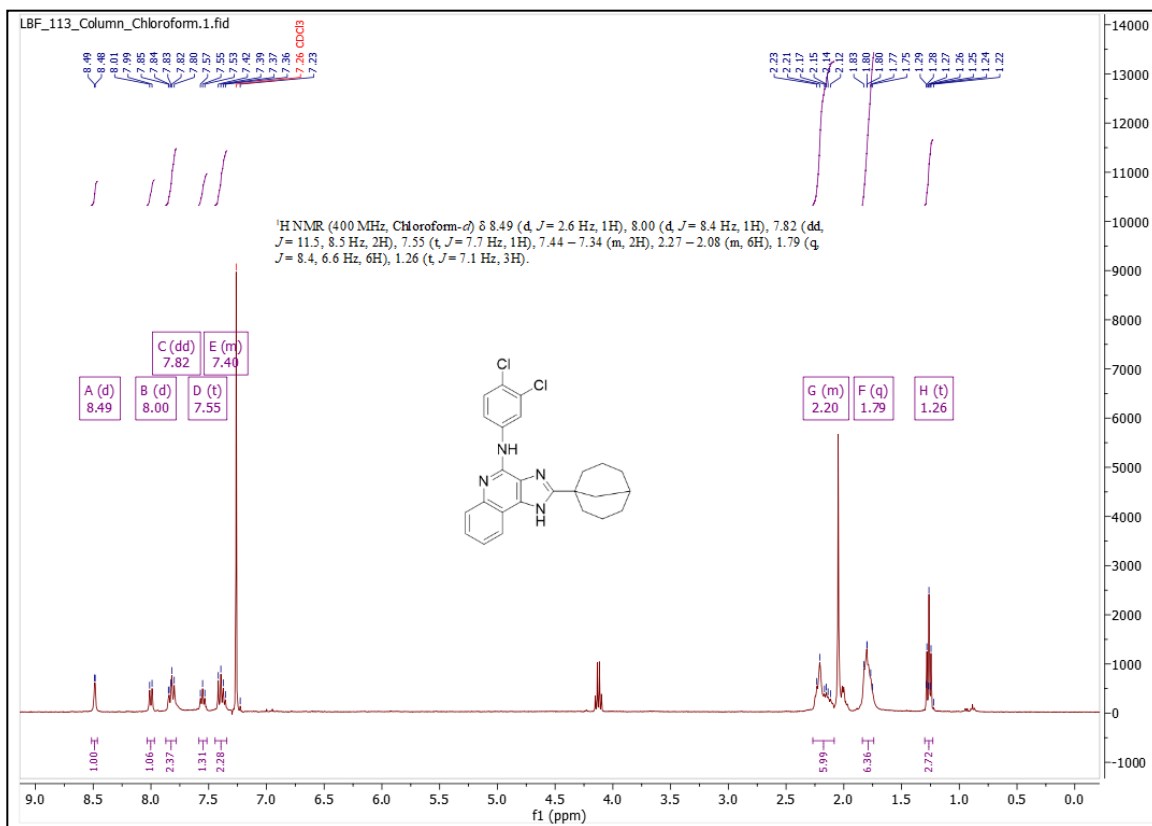

<sup>1</sup>H NMR of 2-(bicyclo[3.3.1]nonan-1-yl)-*N*-(3,4-dichlorophenyl)-1*H*-imidazo[4,5-*c*]quinolin-4-amine – Compound **26**.

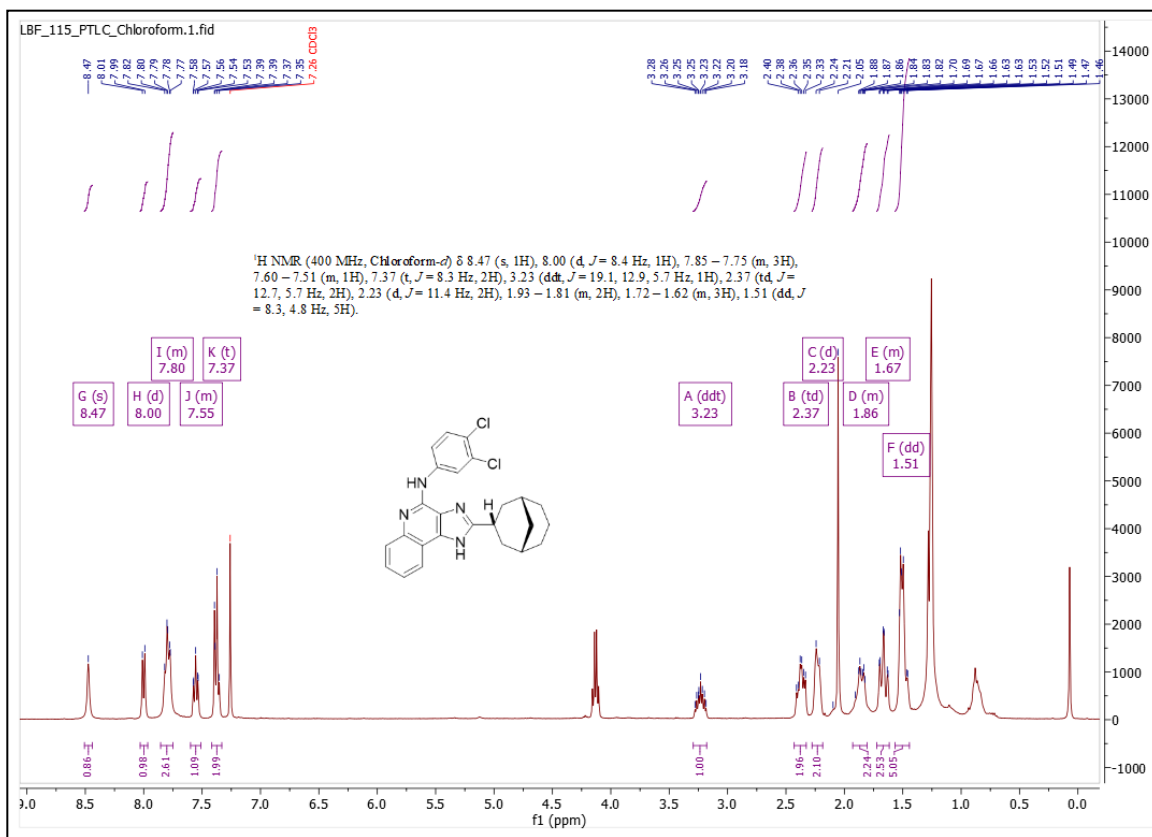

<sup>1</sup>H NMR of 2-((1R,3S,5S)-bicyclo[3.3.1]nonan-3-yl)-*N*-(3,4-dichlorophenyl)-1*H*-imidazo[4,5-*c*]quinolin-4-amine – Compound **27**.

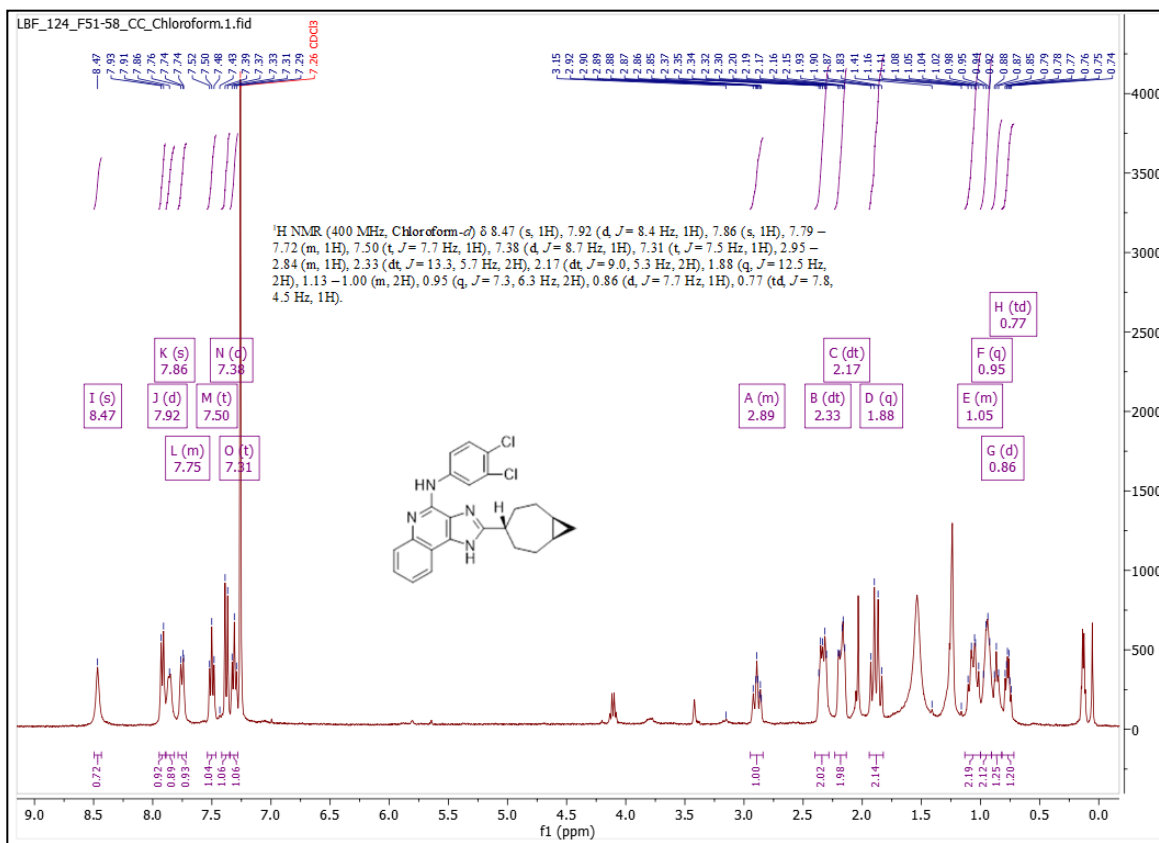

<sup>1</sup>H NMR of 2-((1R,4r,7S)-bicyclo[5.1.0]octan-4-yl)-*N*-(3,4-dichlorophenyl)-1*H*-imidazo[4,5-*c*]quinolin-4-amine – Compound **28**.



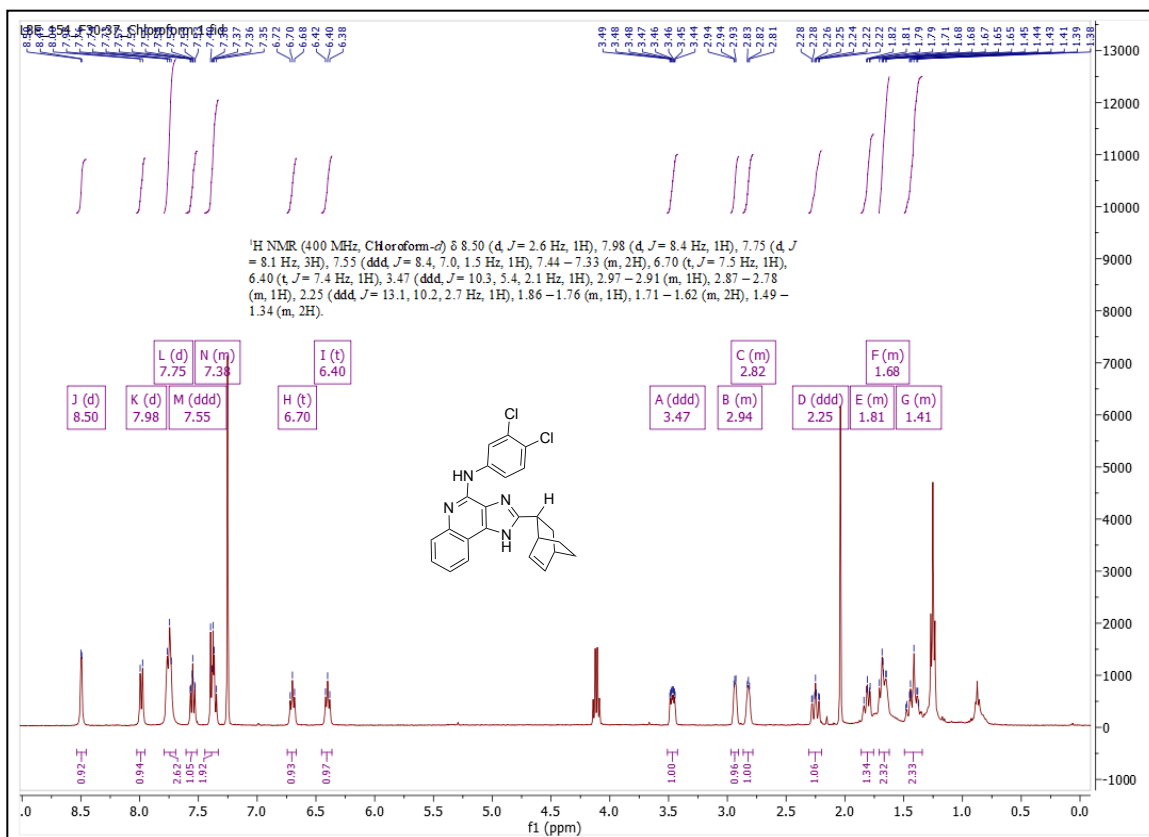

<sup>1</sup>H NMR of 2-((1R,2R,4R) & (1S,2S,4S)-bicyclo[2.2.2]oct-5-en-2-yl)-*N*-(3,4-dichlorophenyl)-1*H*-imidazo[4,5-*c*]quinolin-4-amine – Compound **29**.

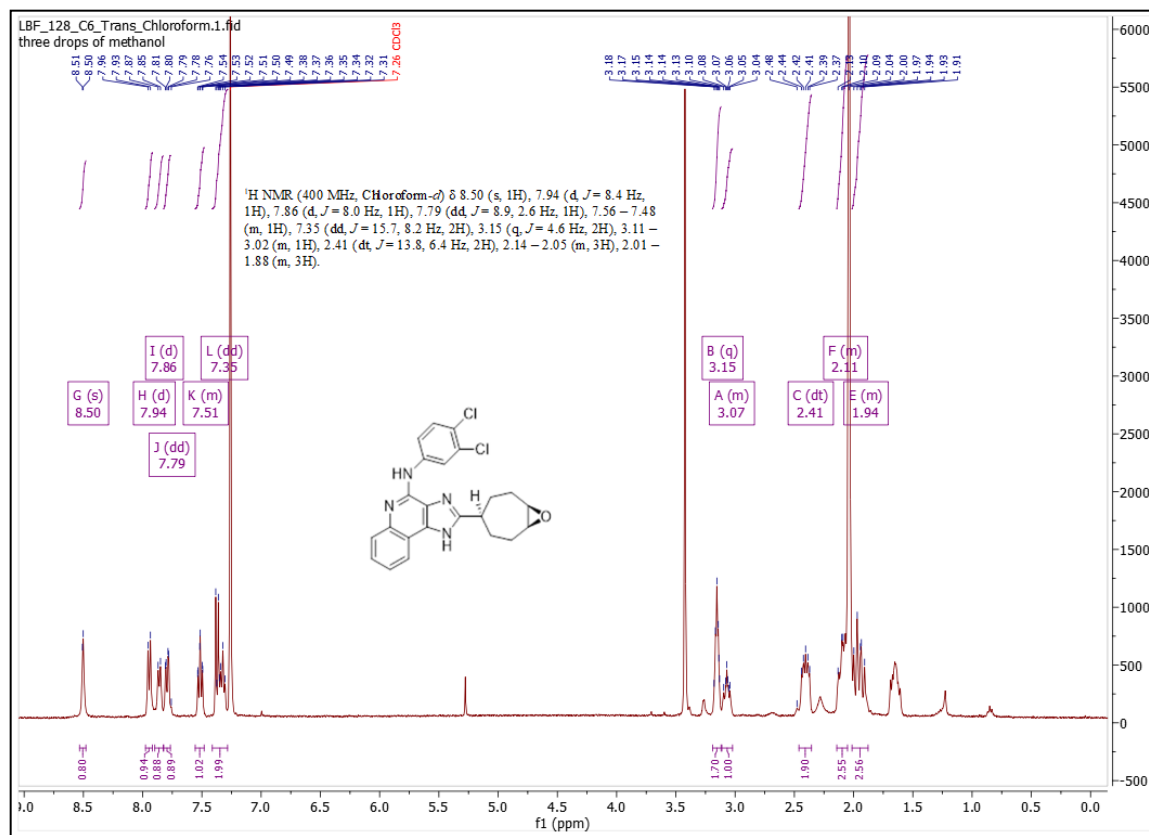

<sup>1</sup>H NMR of 2-((1*R*,4*r*,7*S*)-8-oxabicyclo[5.1.0]octan-4-yl)-*N*-(3,4-dichlorophenyl)-1*H*-imidazo[4,5-*c*]quinolin-4-amine – Compound **30**.

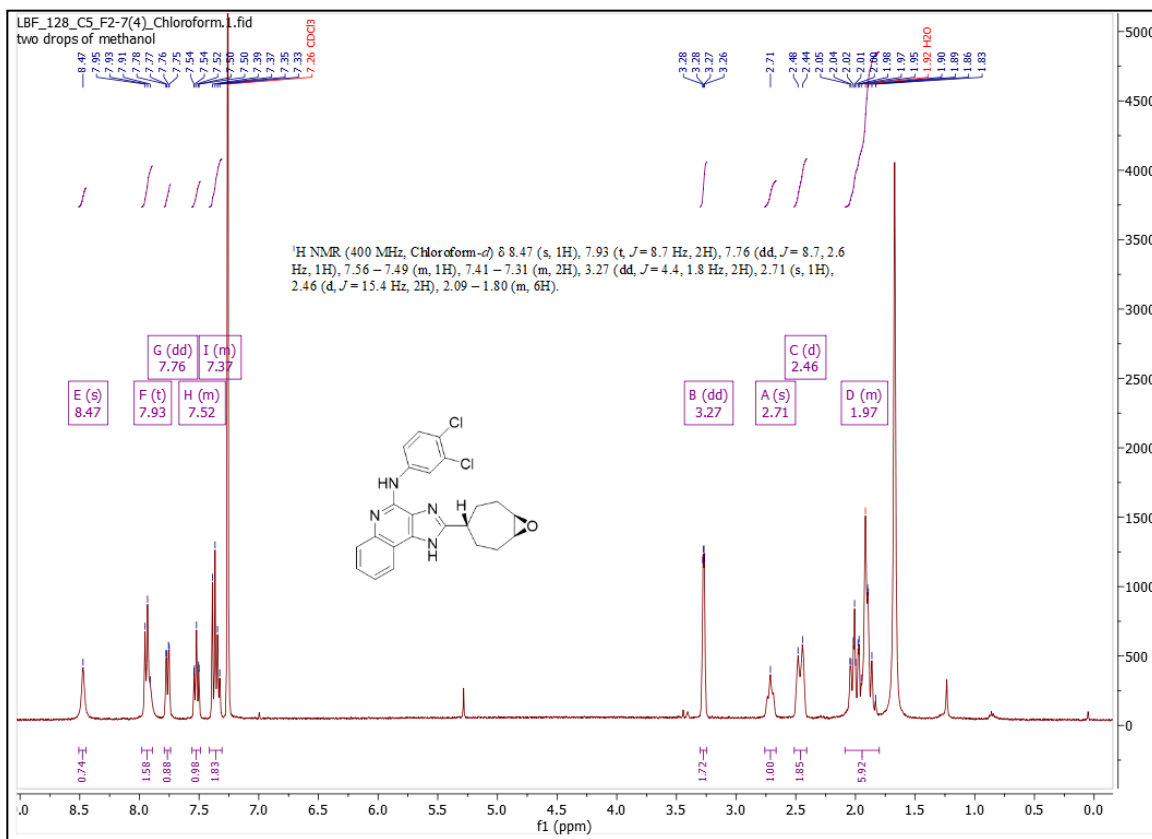

<sup>1</sup>H NMR of 2-((1R,4s,7S)-8-oxabicyclo[5.1.0]octan-4-yl)-N-(3,4-dichlorophenyl)-1H-imidazo[4,5-c]quinolin-4-amine – Compound **31**.

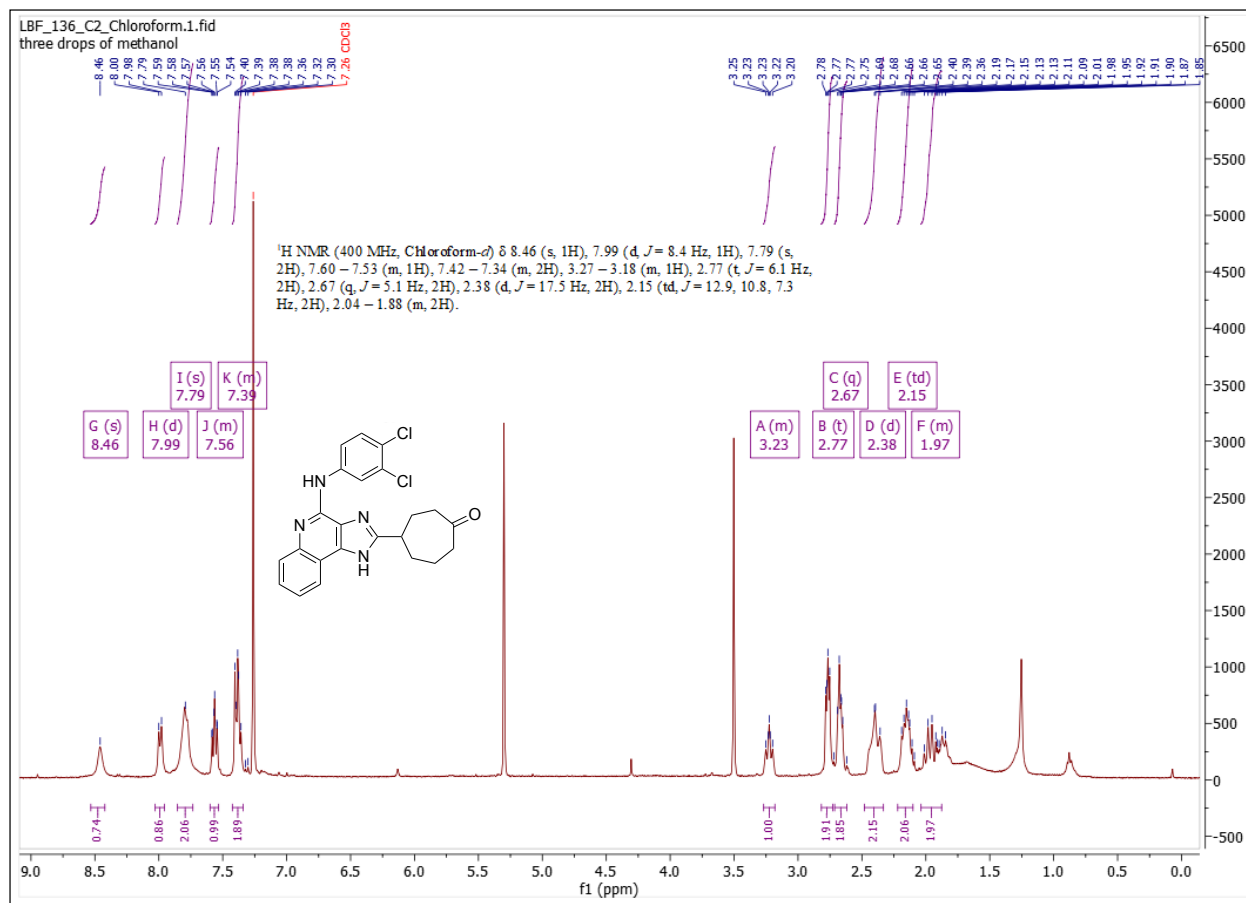

<sup>1</sup>H NMR of (R)- & (S)-4-(4-((3,4-dichlorophenyl)amino)-1*H*-imidazo[4,5-*c*]quinolin-2-yl)cycloheptan-1-one – Compound **32**.

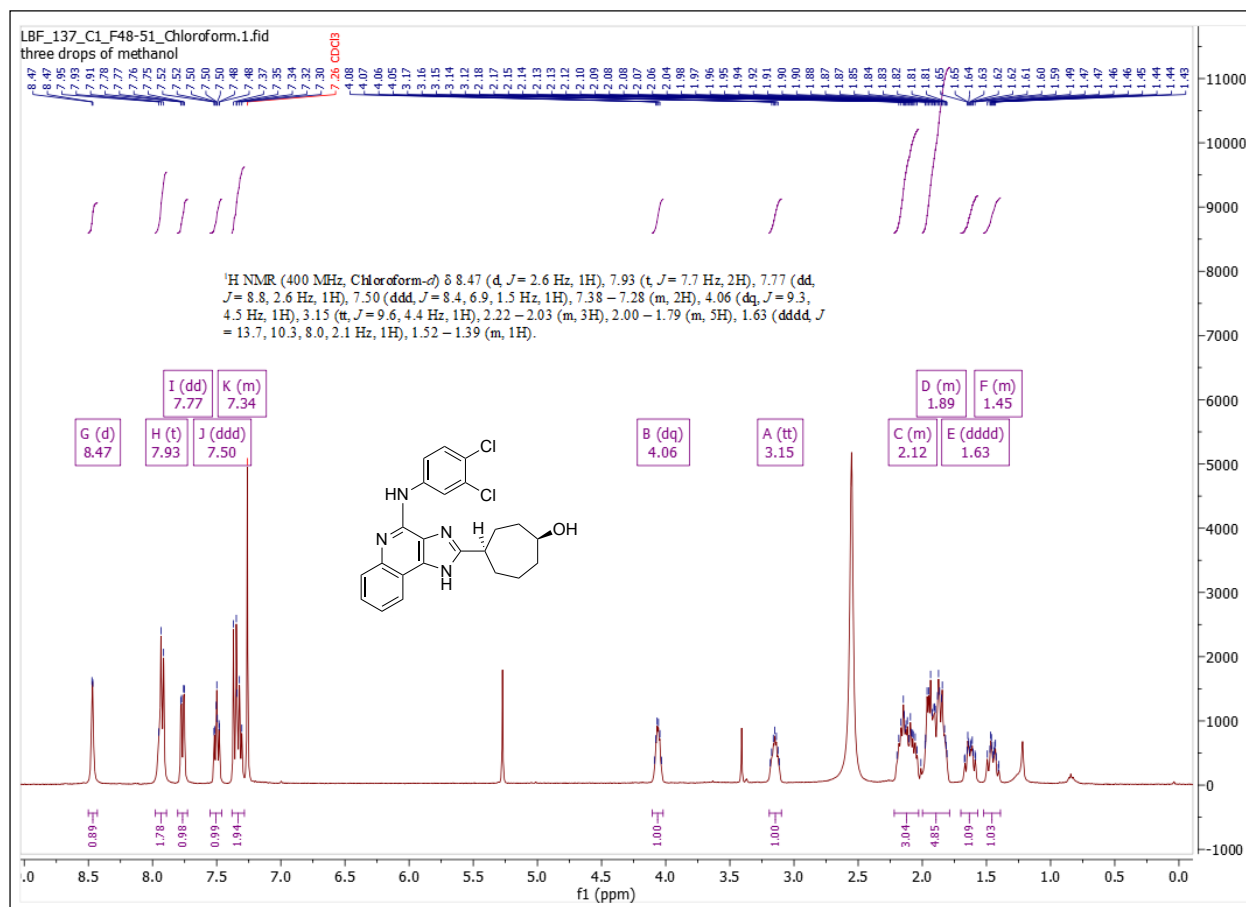

$^1\text{H}$  NMR of (1R,4S)- & (1S,4R)-4-(4-((3,4-dichlorophenyl)amino)-1H-imidazo[4,5-c]quinolin-2-yl)cycloheptan-1-ol – Compound **33**.

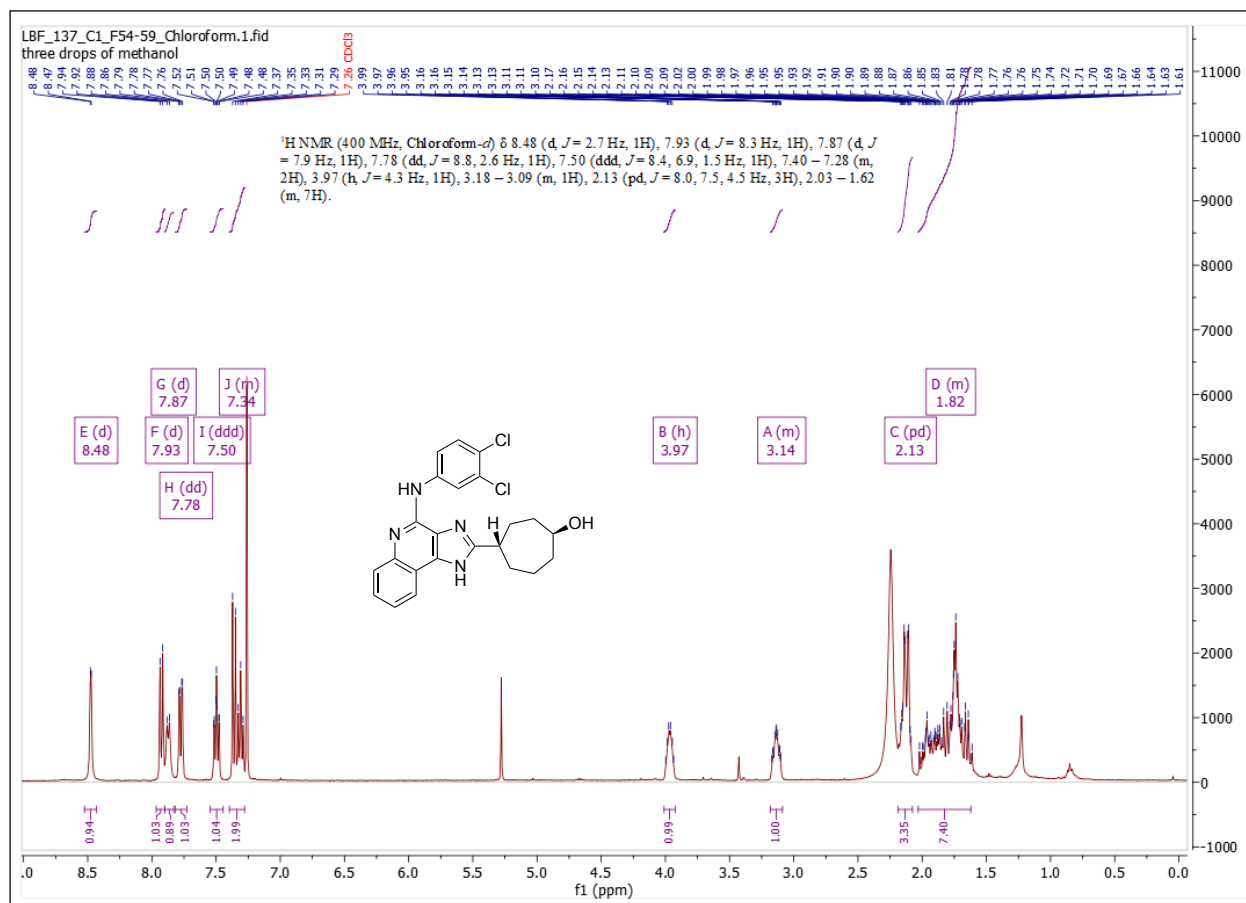

<sup>1</sup>H NMR of (1R,4R)-, & (1S,4S)-4-(4-((3,4-dichlorophenyl)amino)-1H-imidazo[4,5-c]quinolin-2-yl)cycloheptan-1-ol – Compound **34**.

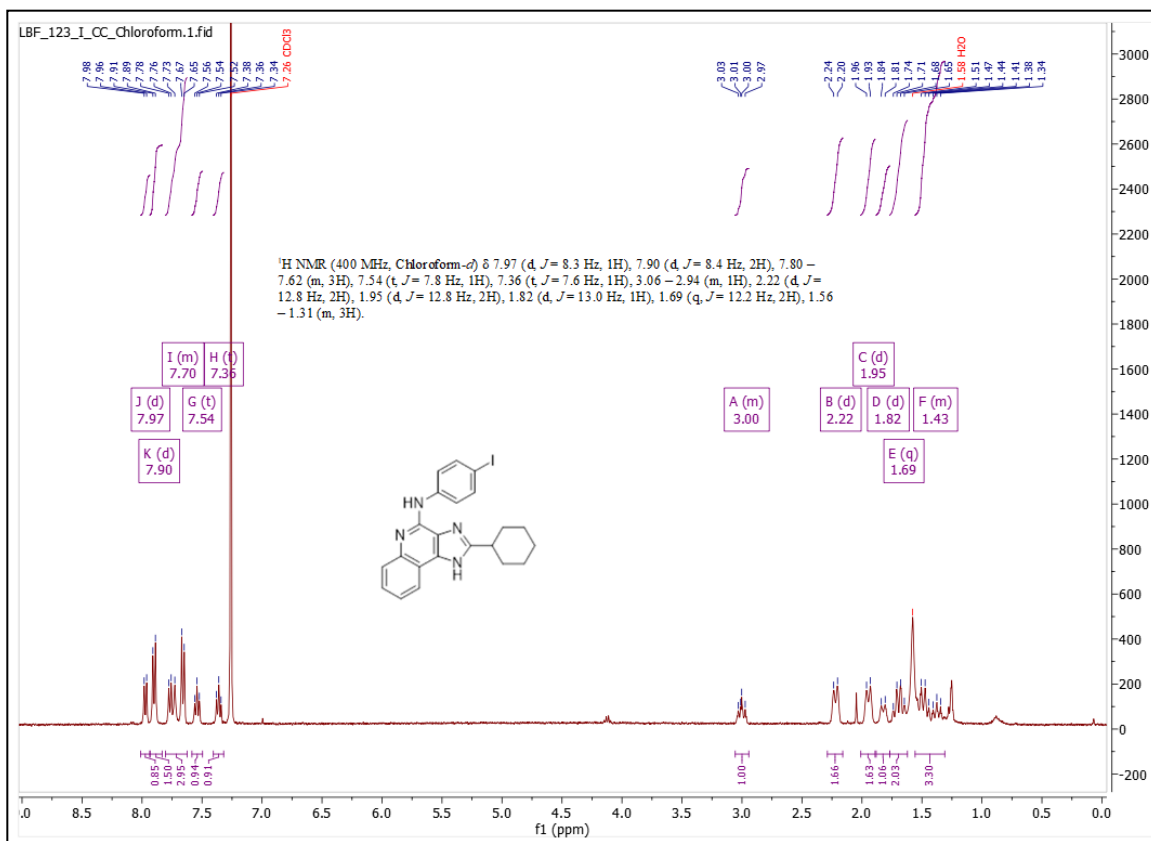

<sup>1</sup>H NMR of 2-cyclohexyl-*N*-(4-iodophenyl)-1*H*-imidazo[4,5-*c*]quinolin-4-amine – Compound 35.

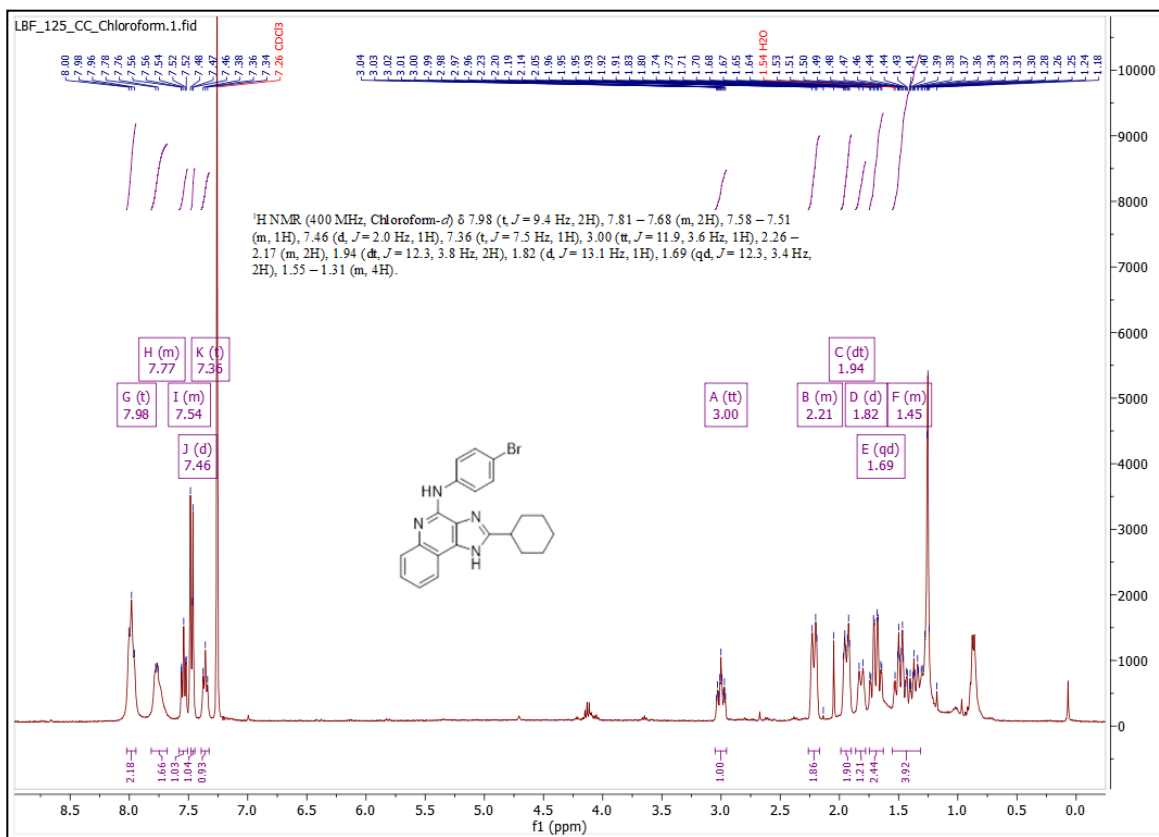

<sup>1</sup>H NMR of 2-cyclohexyl-*N*-(4-bromophenyl)-1*H*-imidazo[4,5-*c*]quinolin-4-amine – Compound **36**.



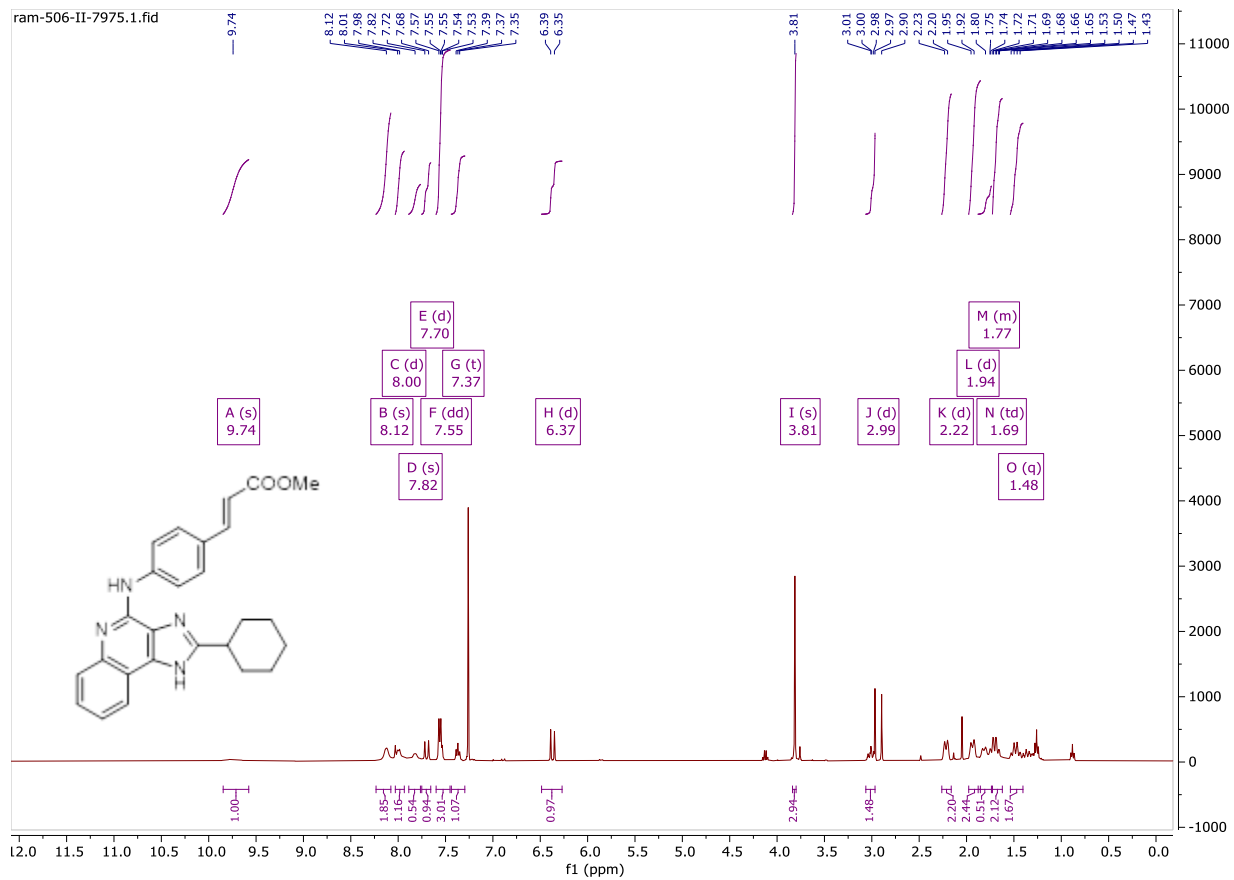

<sup>1</sup>H NMR of methyl (E)-3-(4-((2-cyclohexyl-1H-imidazo[4,5-c]quinolin-4-yl)amino)phenyl)acrylate – Compound 37.

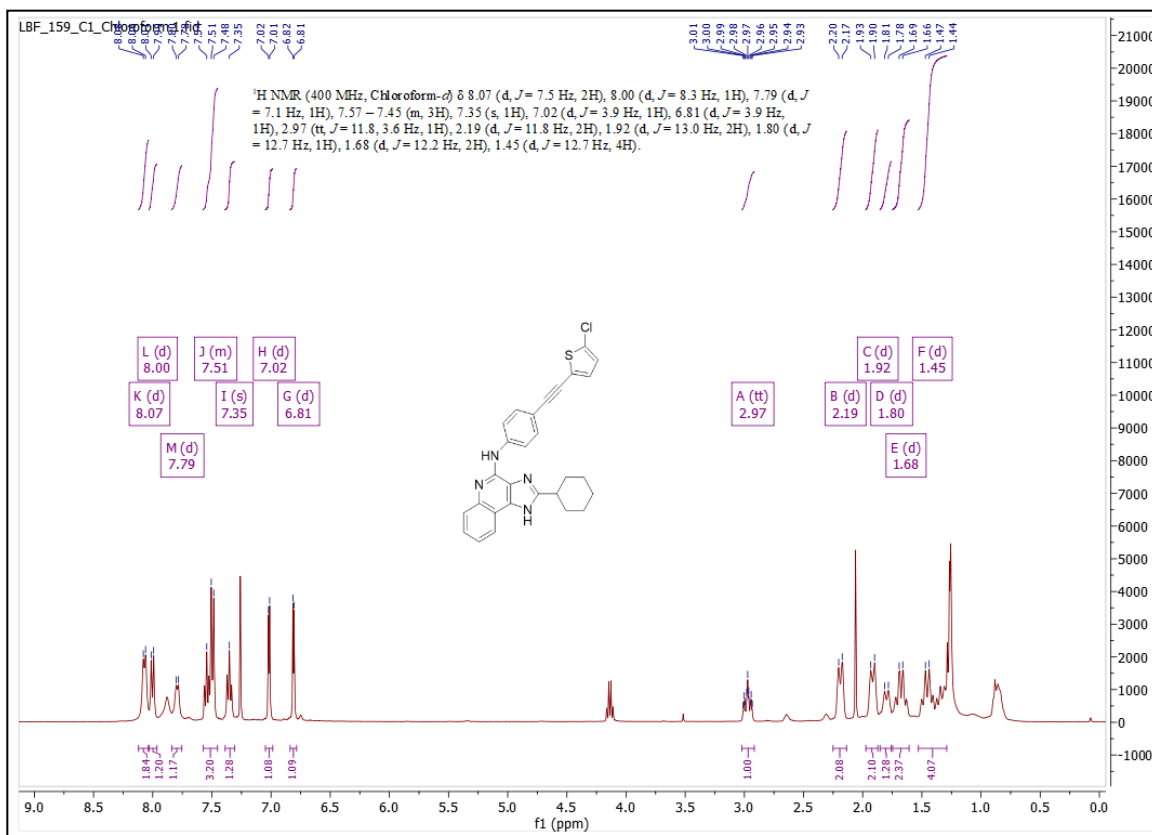

<sup>1</sup>H NMR of 2-cyclohexyl-*N*-(4-((5-chlorothiophen-2-yl)ethynyl)phenyl)-1*H*-imidazo[4,5-*c*]quinolin-4-amine – Compound **38**.

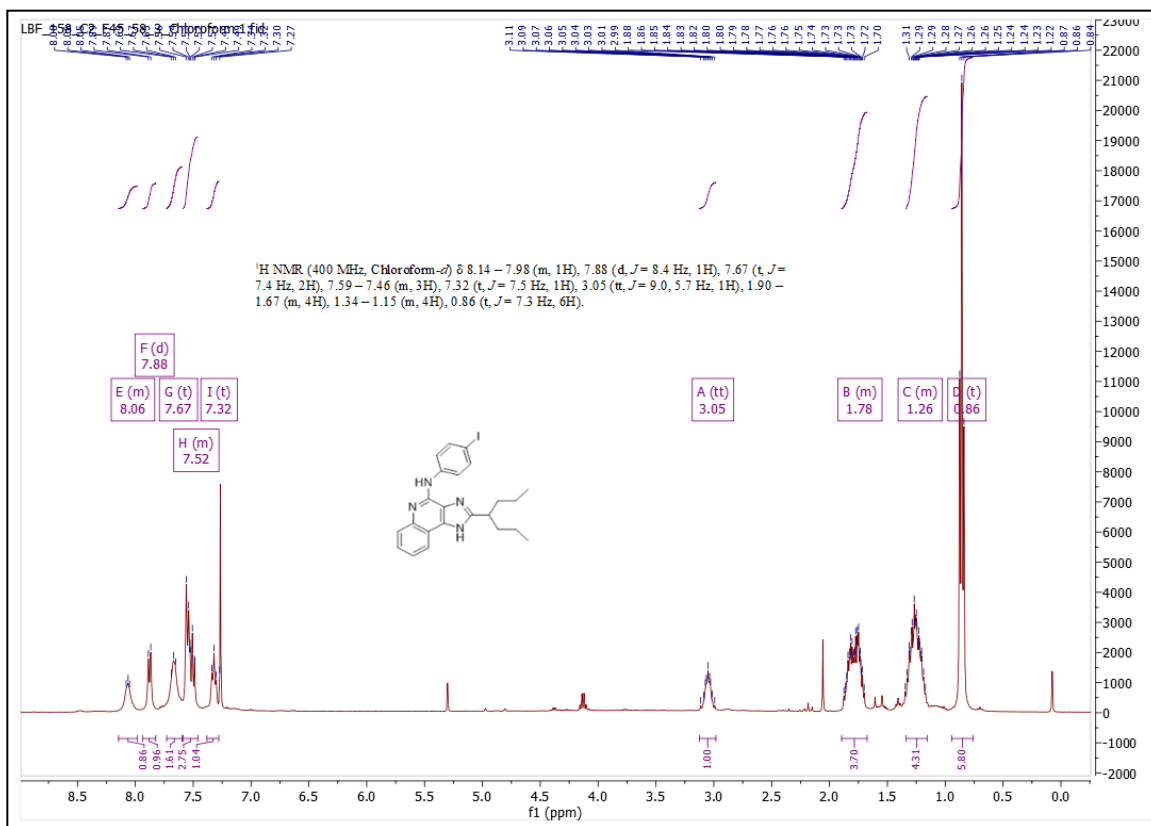

<sup>1</sup>H NMR of 2-(heptan-4-yl)-*N*-(4-iodophenyl)-1*H*-imidazo[4,5-*c*]quinolin-4-amine – Compound **39**.

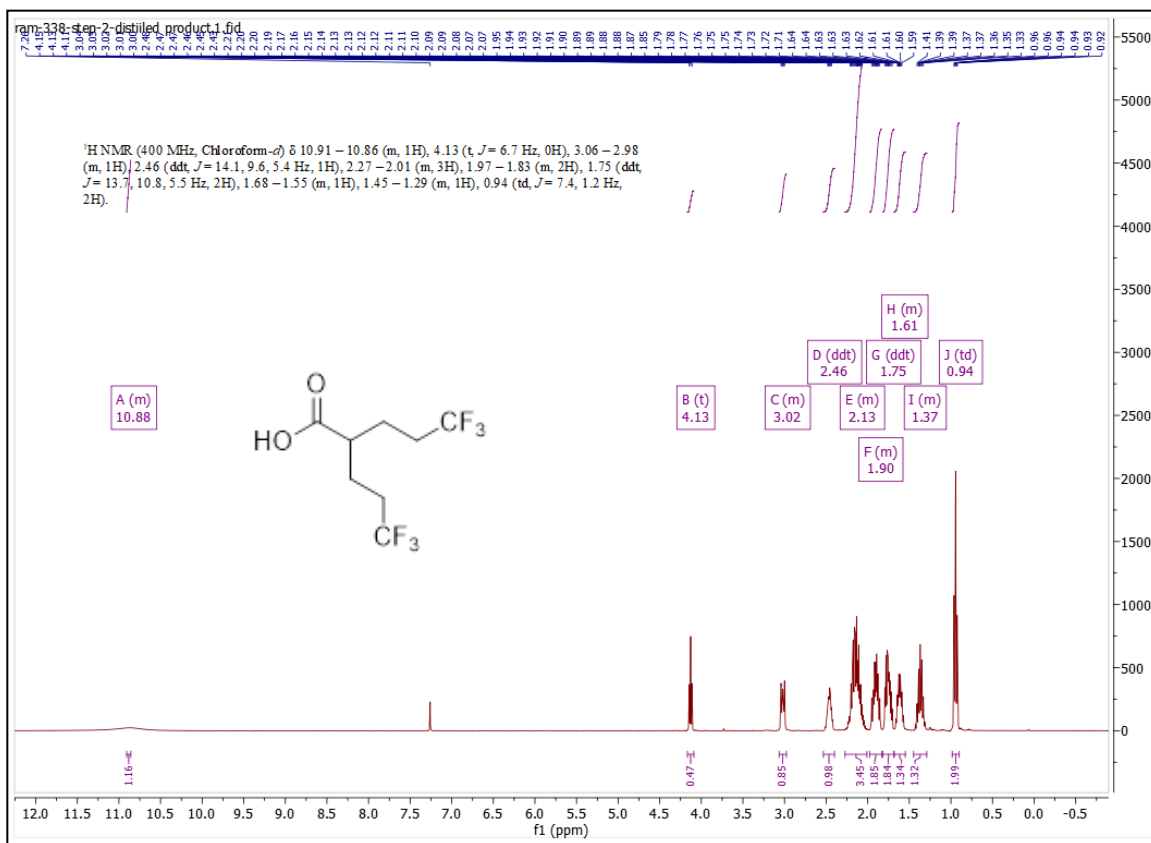

<sup>1</sup>H NMR of 5,5,5-trifluoro-2-(3,3,3-trifluoropropyl)pentanoic Acid – Compound **45c**.

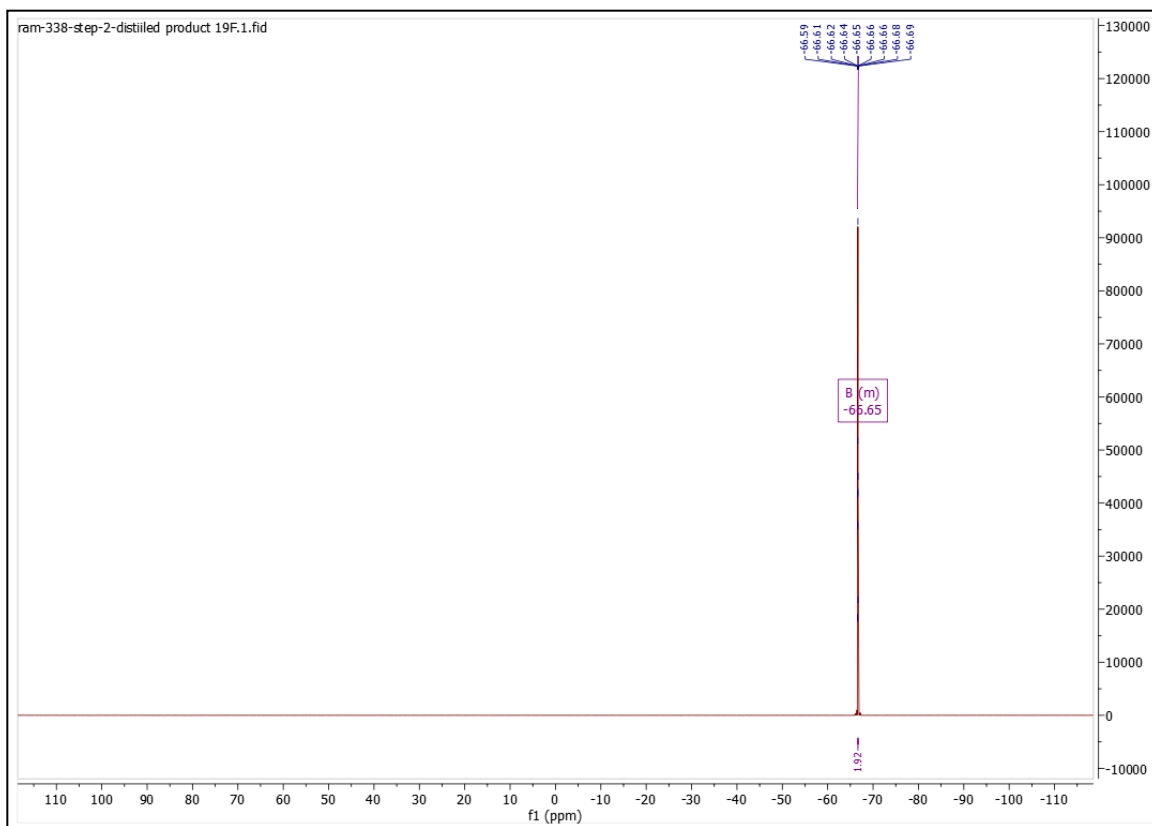

$^{19}\text{F}$  NMR of 5,5,5-trifluoro-2-(3,3,3-trifluoropropyl)pentanoic Acid – Compound **45c**.

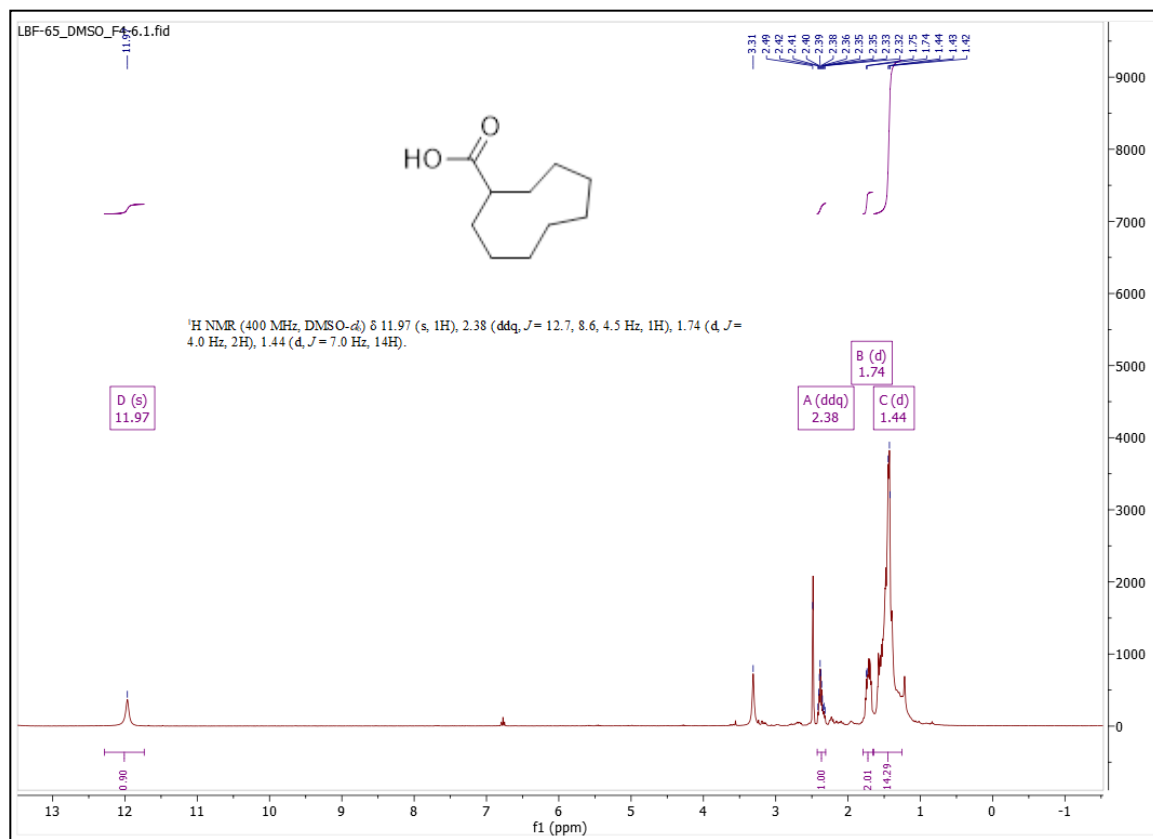

$^1\text{H NMR}$  of cyclononanecarboxylic acid – Compound **451**.

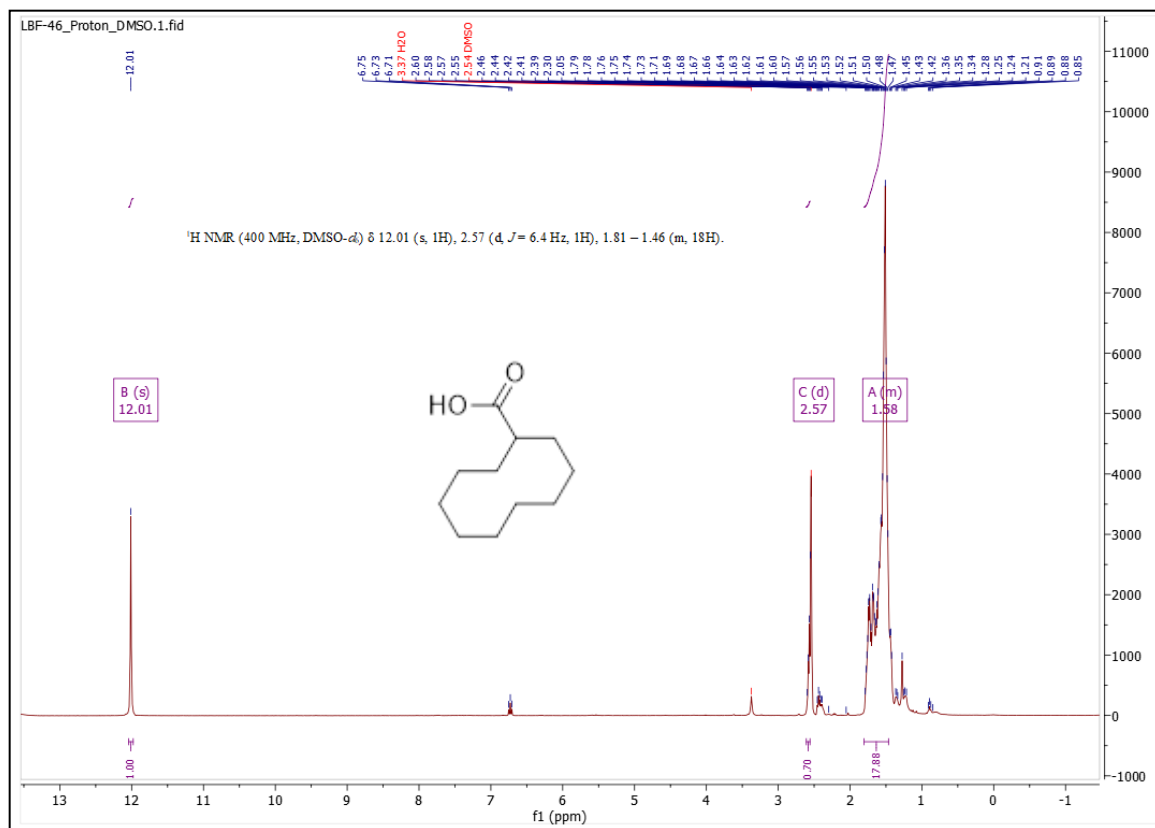

$^1\text{H NMR}$  of cyclodecanecarboxylic acid – Compound **45m**.

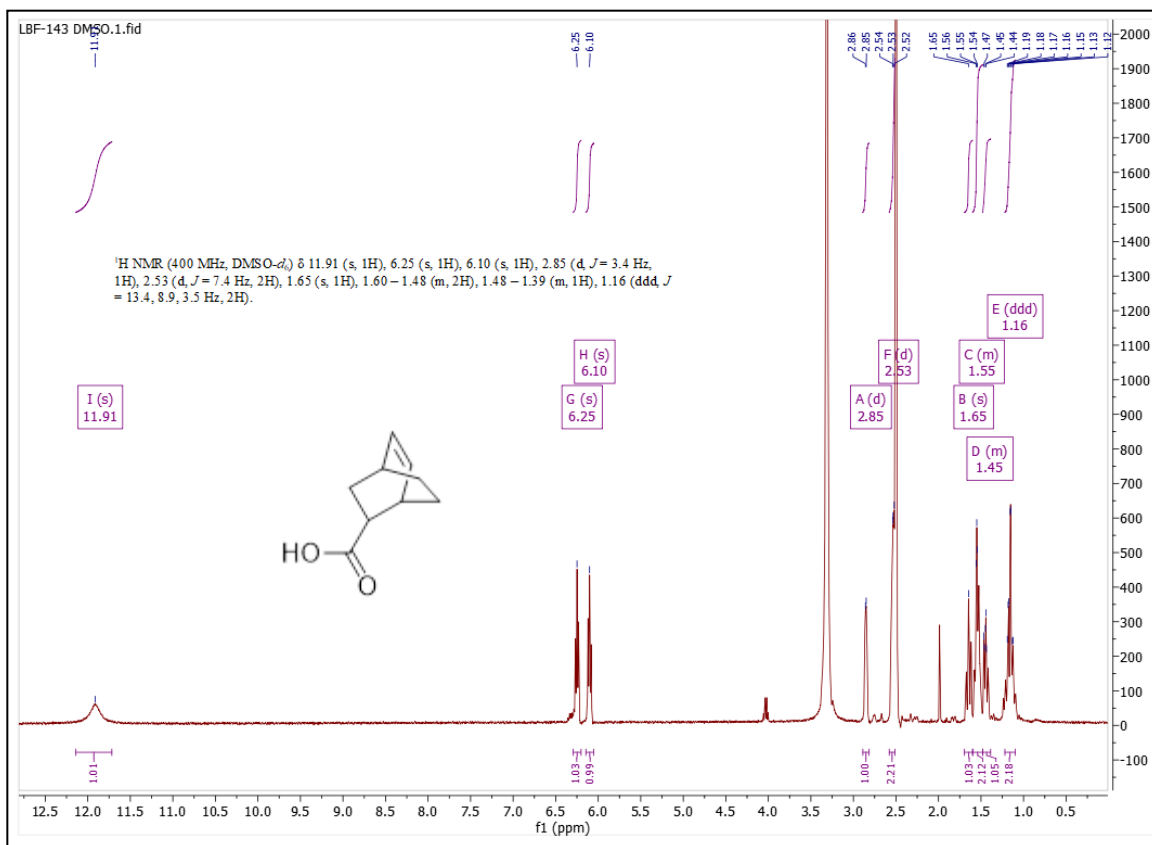

<sup>1</sup>H NMR of ((1R,2R,4R)- & (1S,2S,4S)-bicyclo[2.2.2]oct-5-ene carboxylic acid – Compound

**45t.**



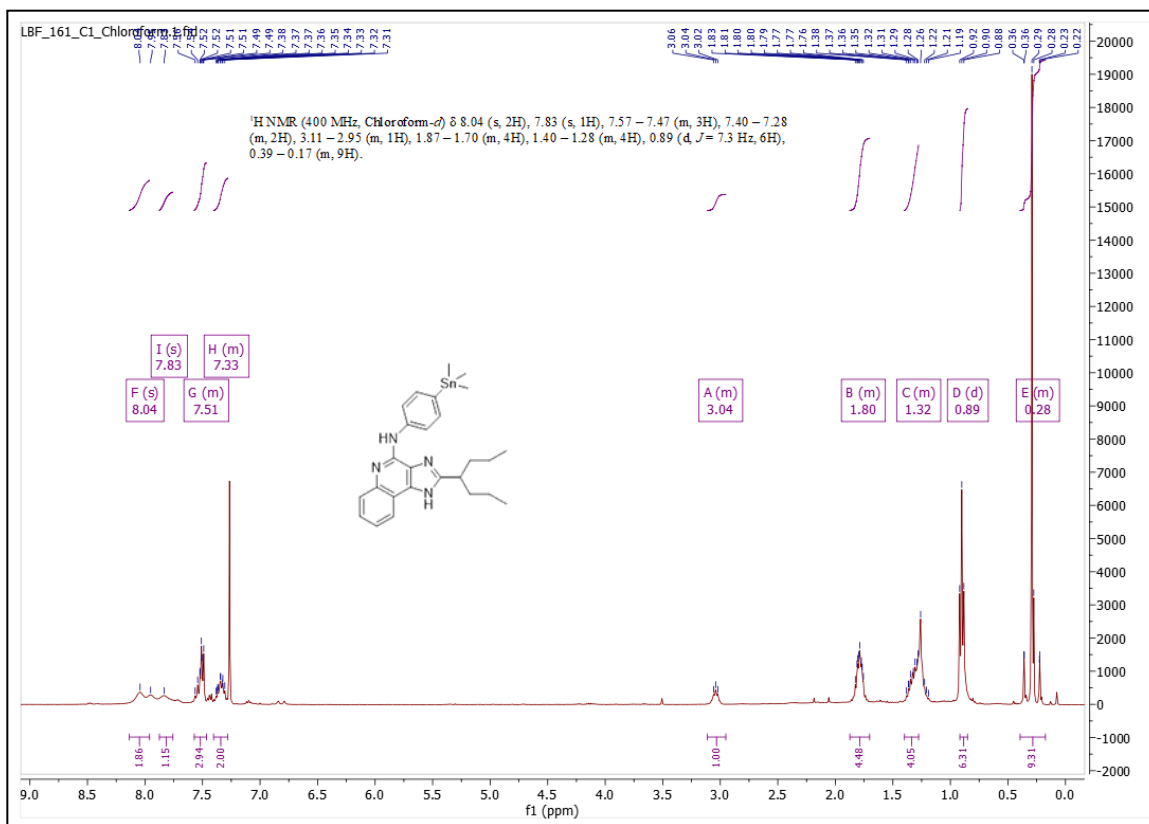

<sup>1</sup>H NMR of 2-(heptan-4-yl)-*N*-(4-(trimethylstannyl)phenyl)-1*H*-imidazo[4,5-*c*]quinolin-4-amine – Compound **48**.

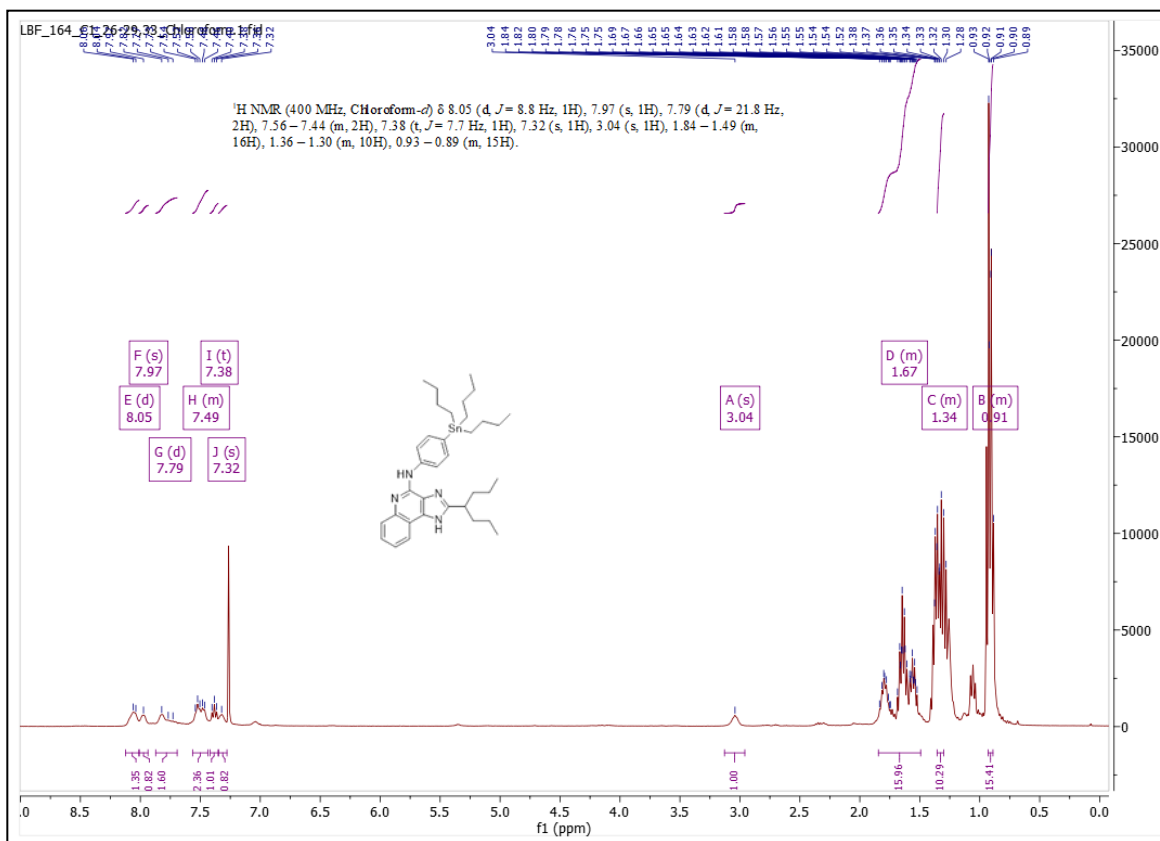

<sup>1</sup>H NMR of 2-(heptan-4-yl)-*N*-(4-(tributylstannyl)phenyl)-1*H*-imidazo[4,5-*c*]quinolin-4-amine – Compound **49**.

The NMR spectra below were acquired on a Bruker NEO-600 with a z-gradient, triple resonant cryoprobe at 298 °K in CDCl<sub>3</sub> plus 4 drops of MeOD, unless otherwise noted. They are referenced to CDCl<sub>3</sub> <sup>1</sup>H=7.26 ppm, <sup>13</sup>C=77.0 ppm for 275 - 298 °K; CD<sub>3</sub>OD <sup>1</sup>H=3.31 ppm, <sup>13</sup>C=49.0 ppm for 298 K.

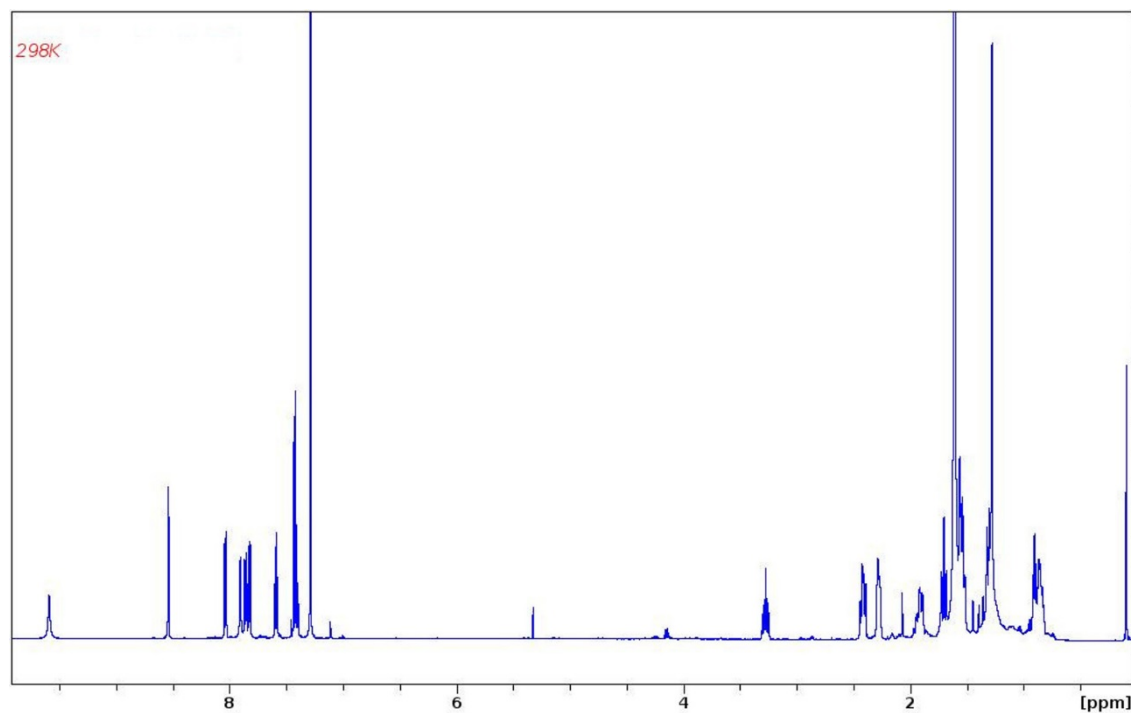

<sup>1</sup>H spectrum of compound **27**.

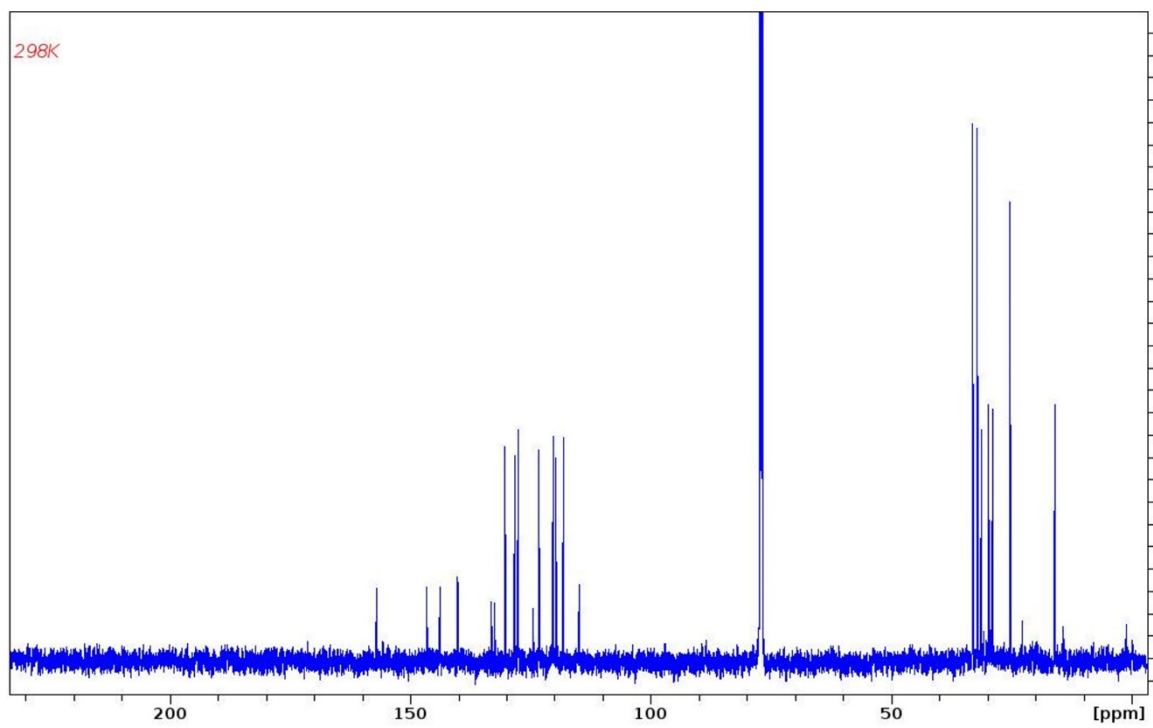

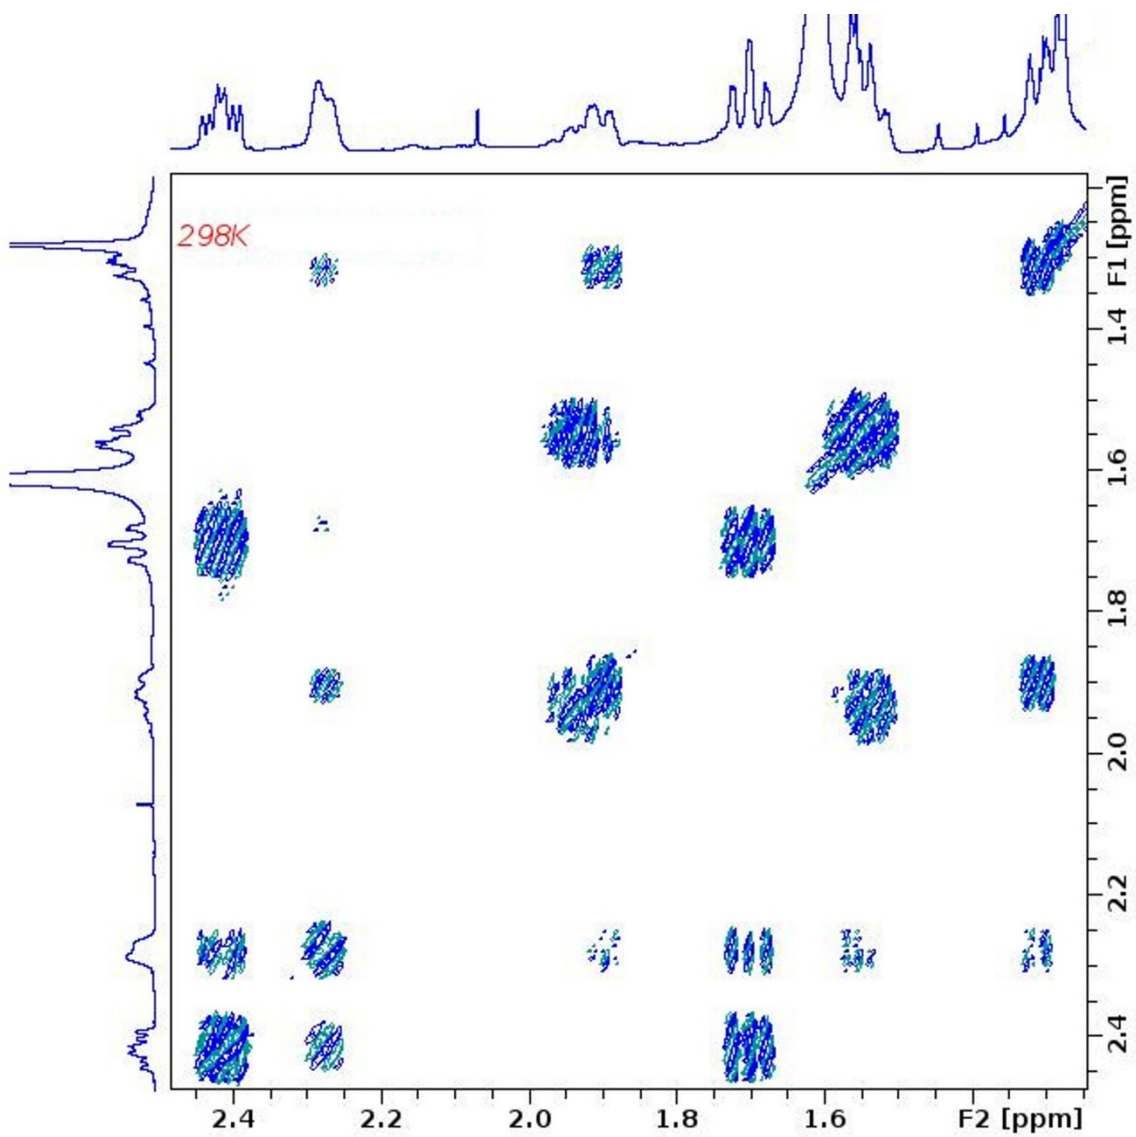

Aliphatic region of  $^1\text{H}$  3Q-COSY (mix=200ms) for compound 27.

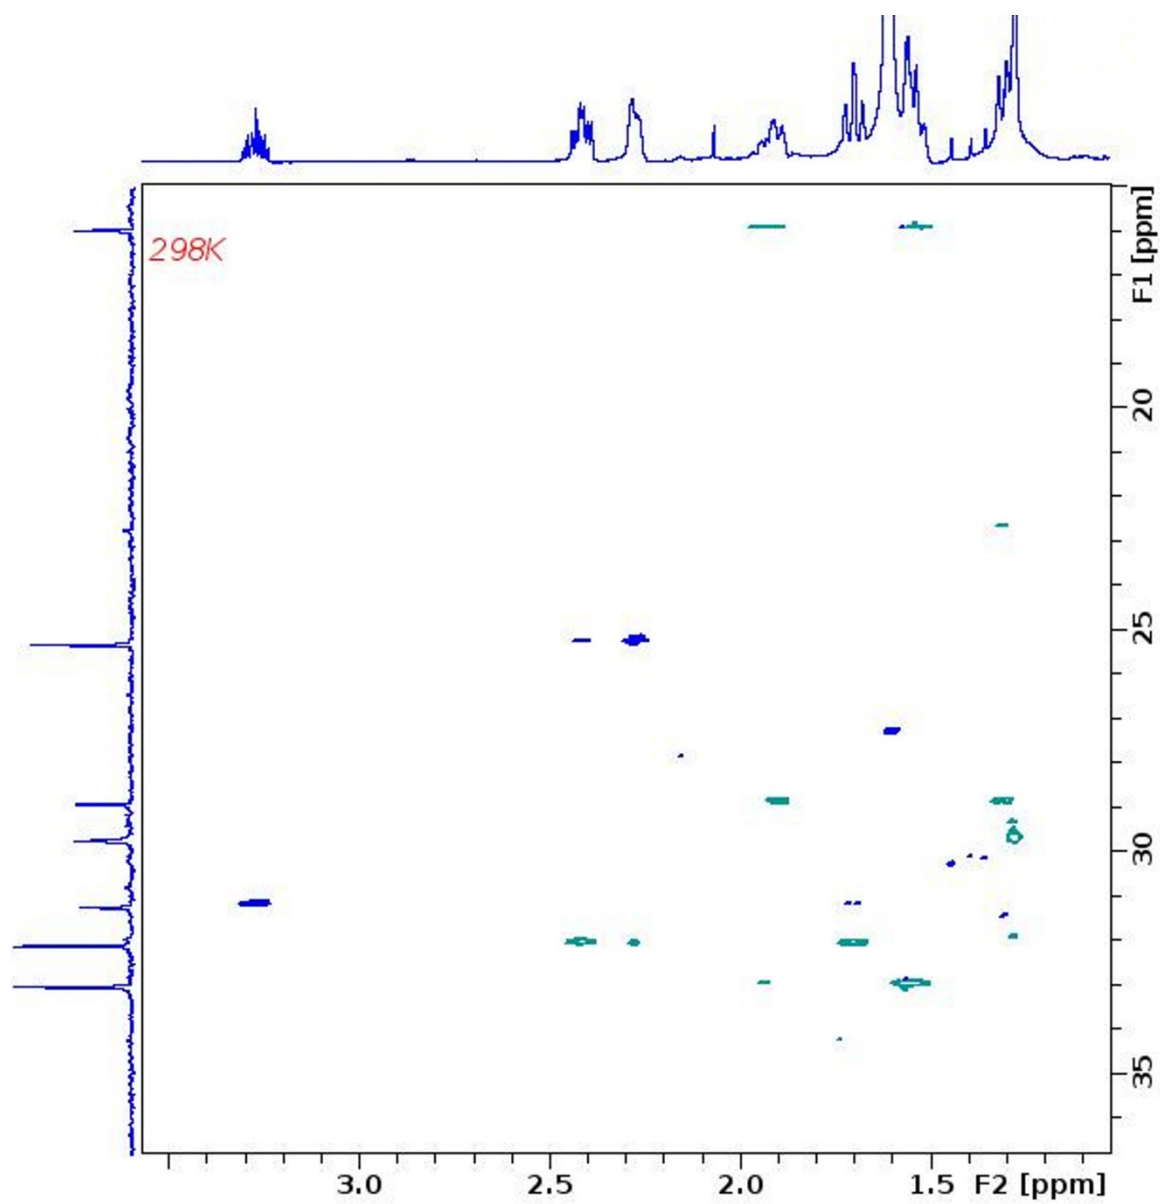

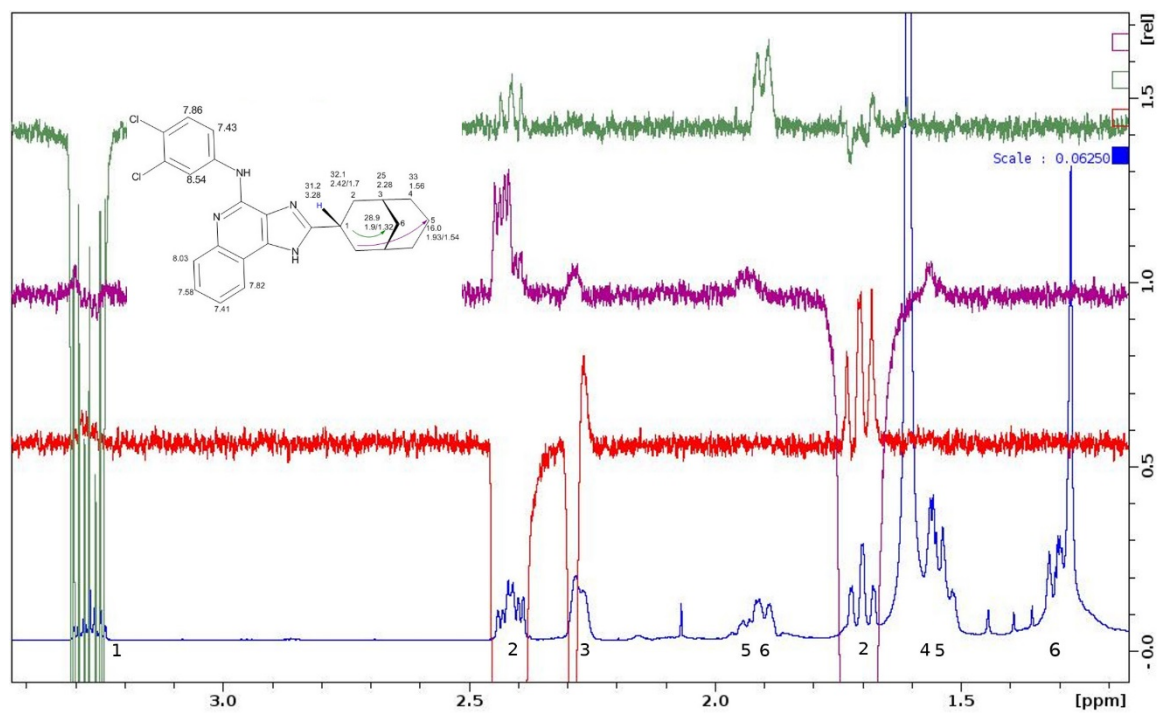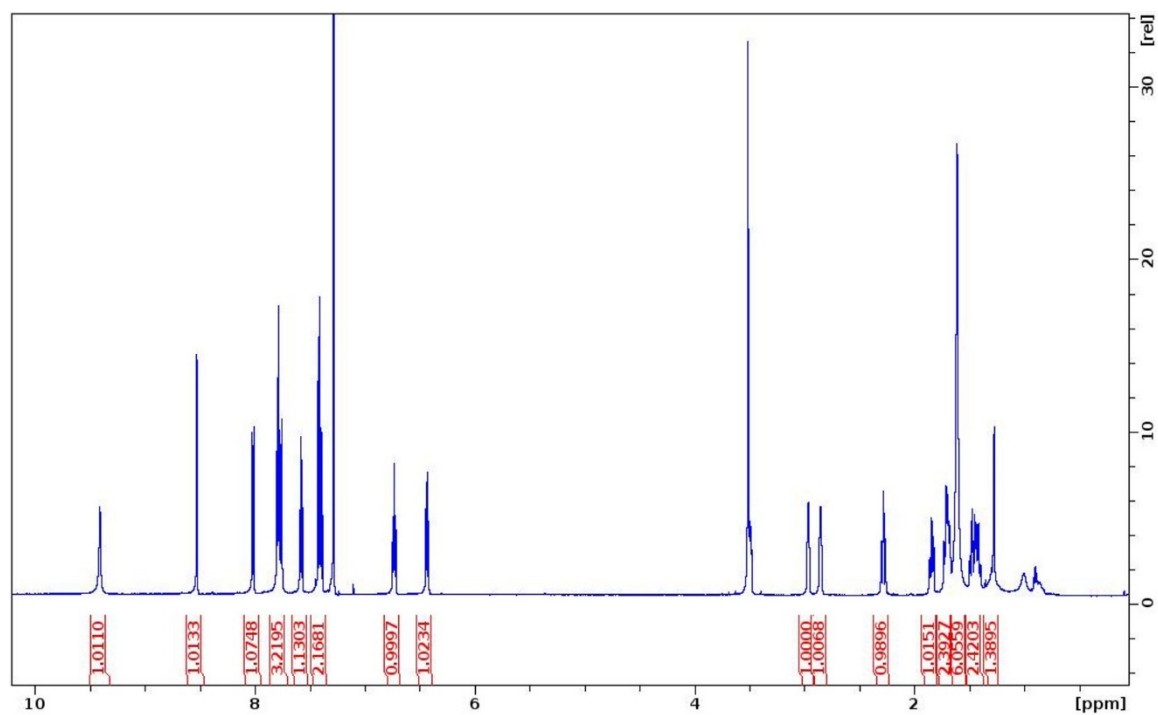

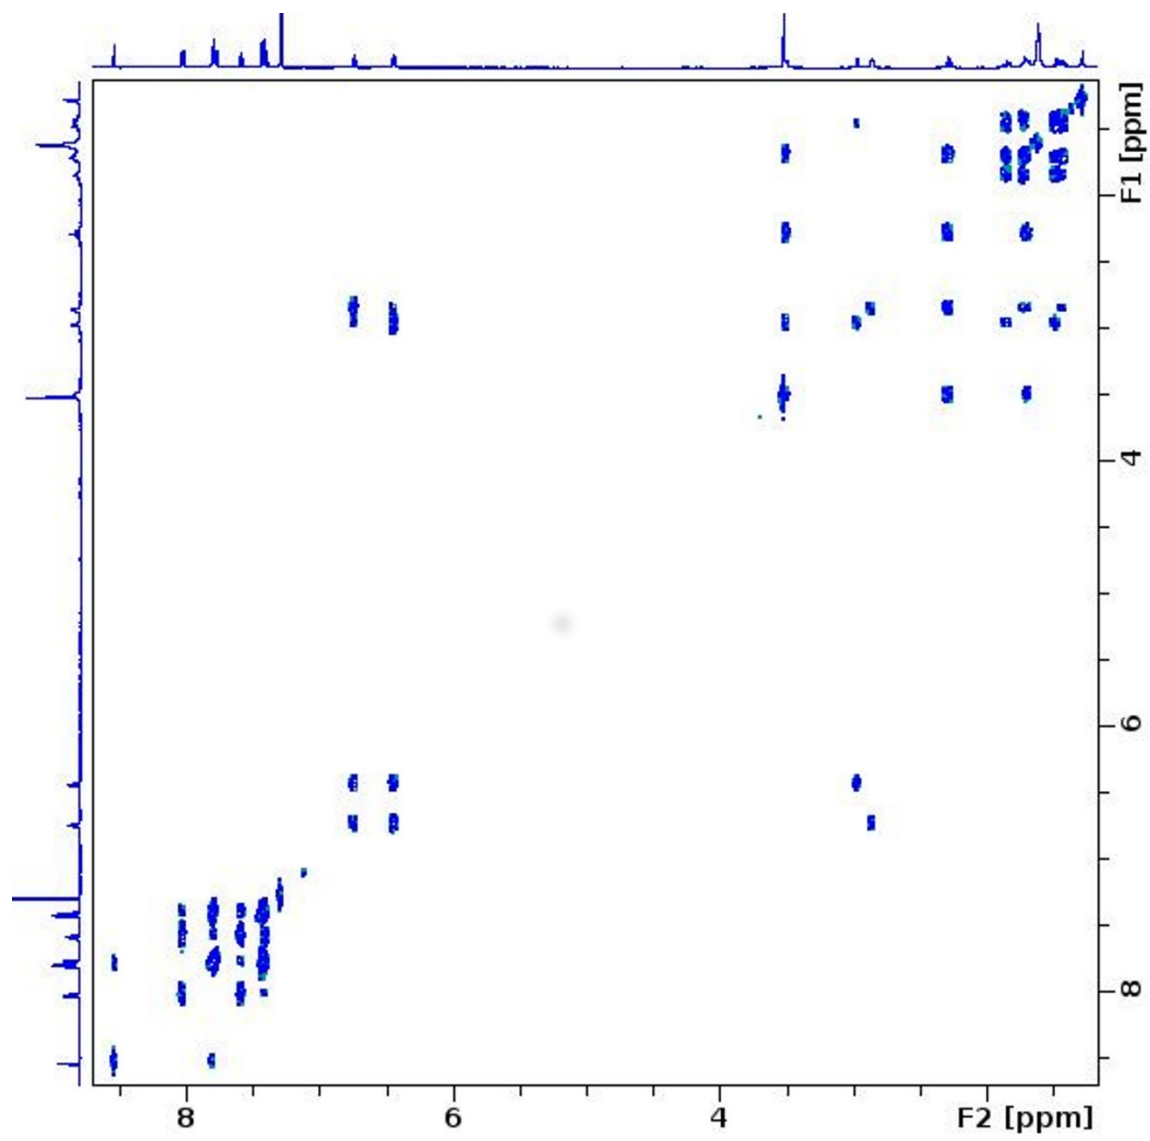

$^1\text{H}$ -COSY spectrum of compound **29**.



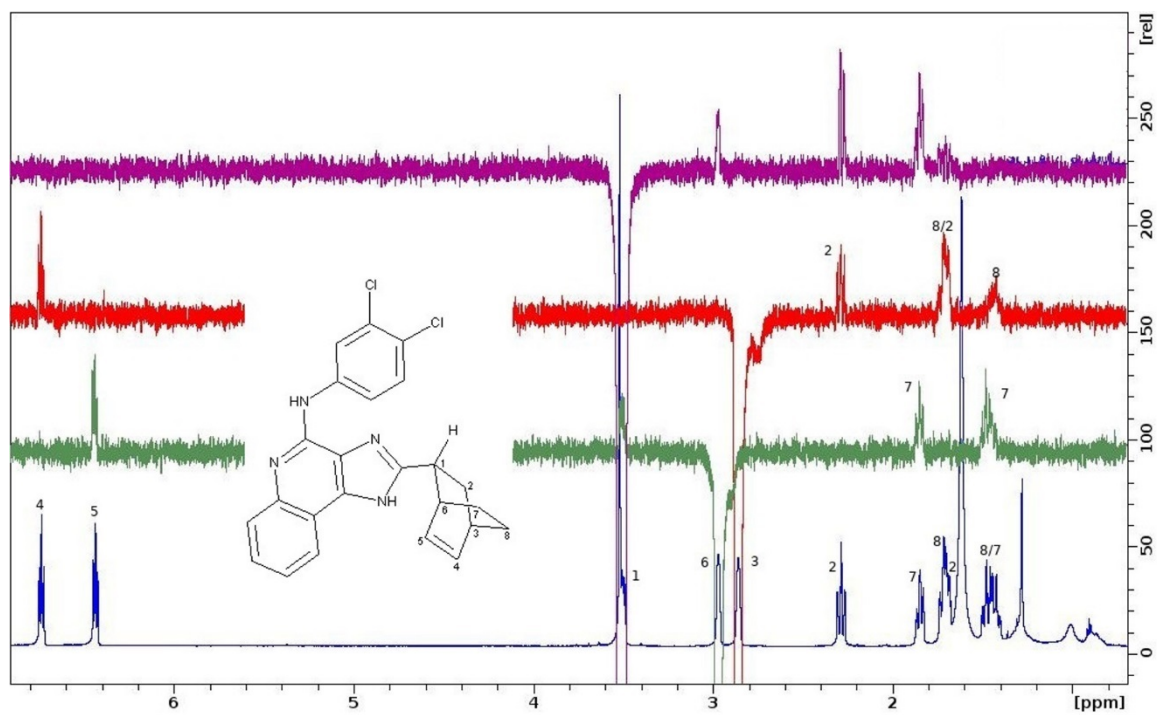

1D-NOE spectra of compound **29**. The 1/7 proximity shown in the purple trace clearly proves the *endo* conformation.

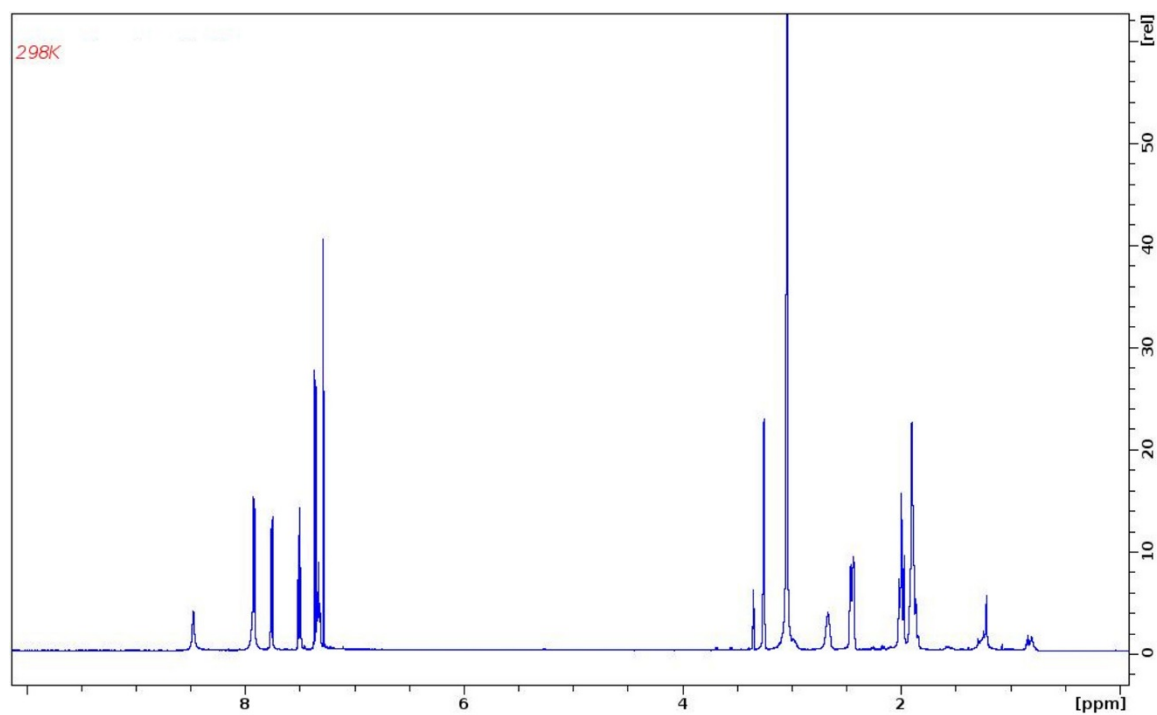

<sup>1</sup>H spectrum of compound **30**.

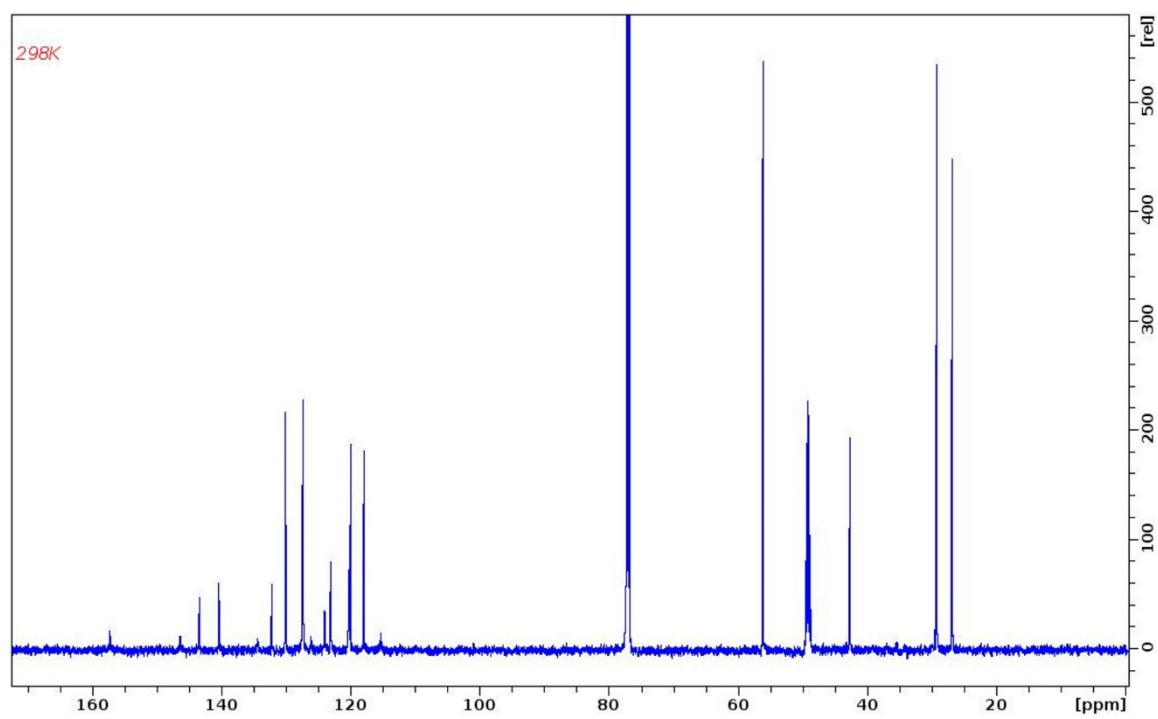

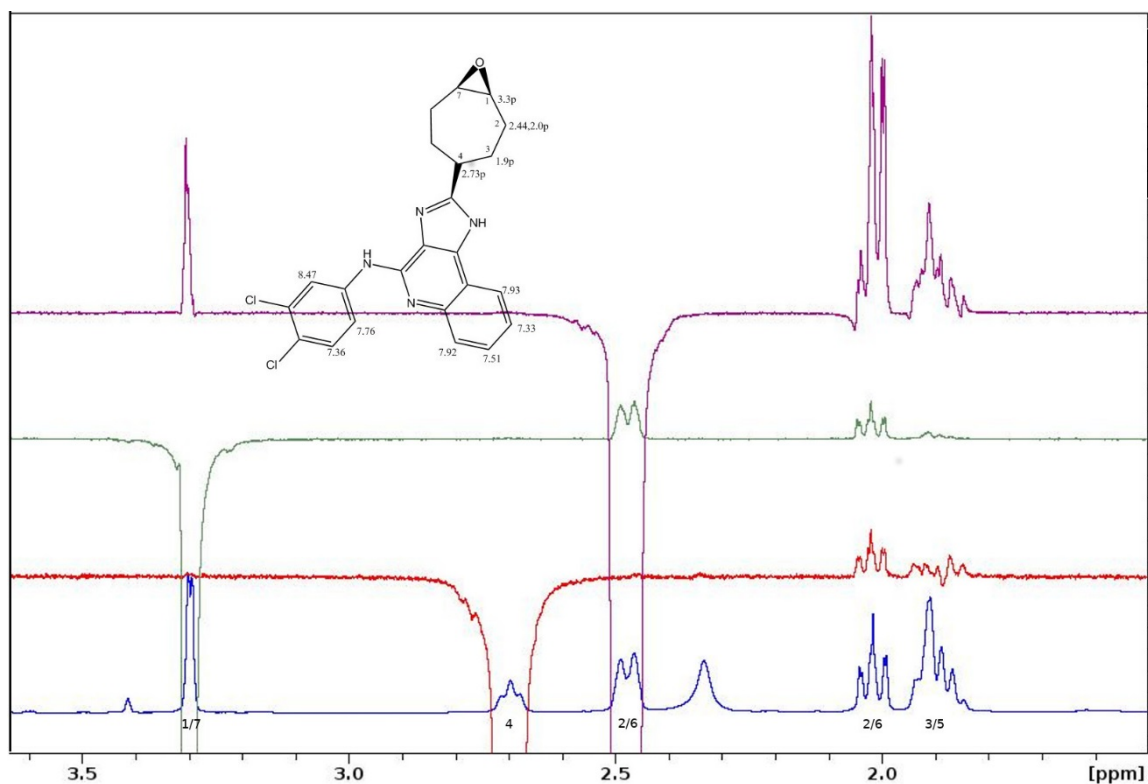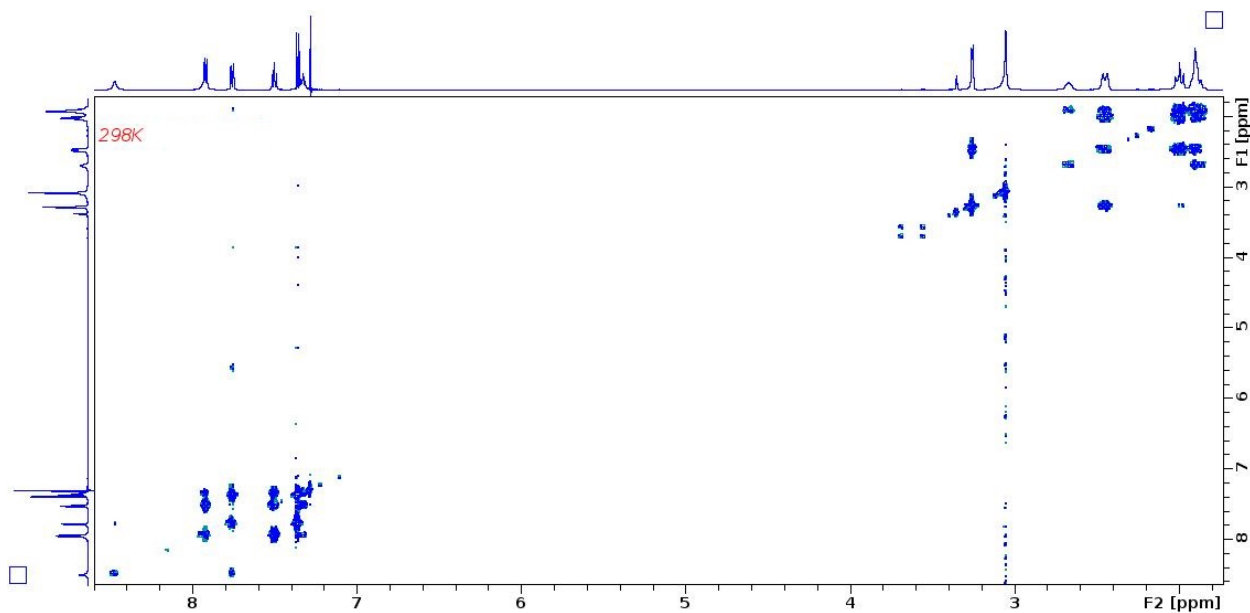

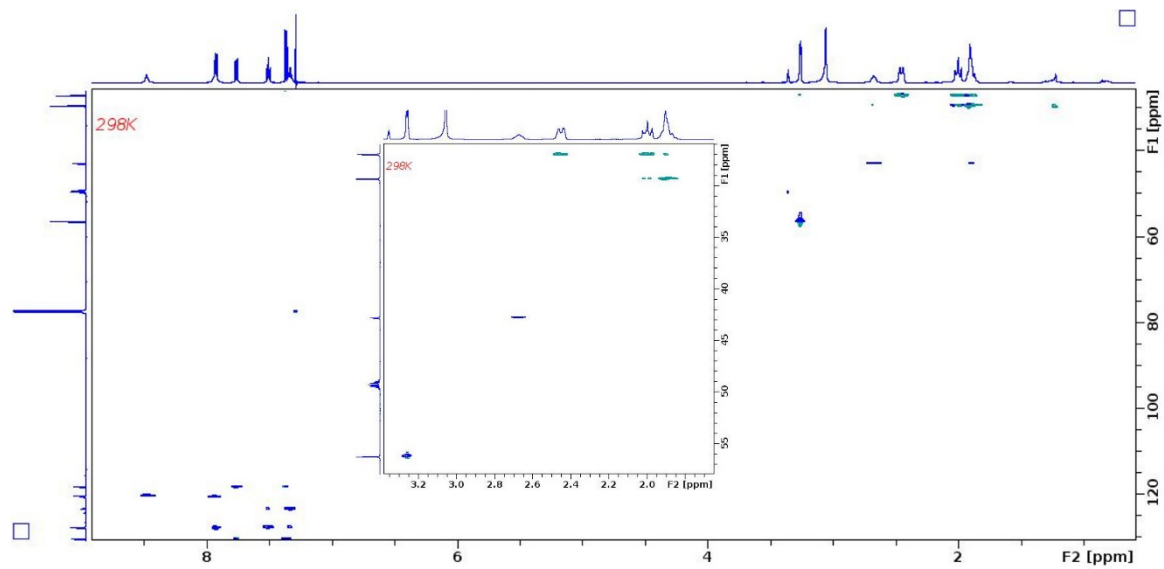

HSQC spectrum of compound **30**.

## Mass Spectra

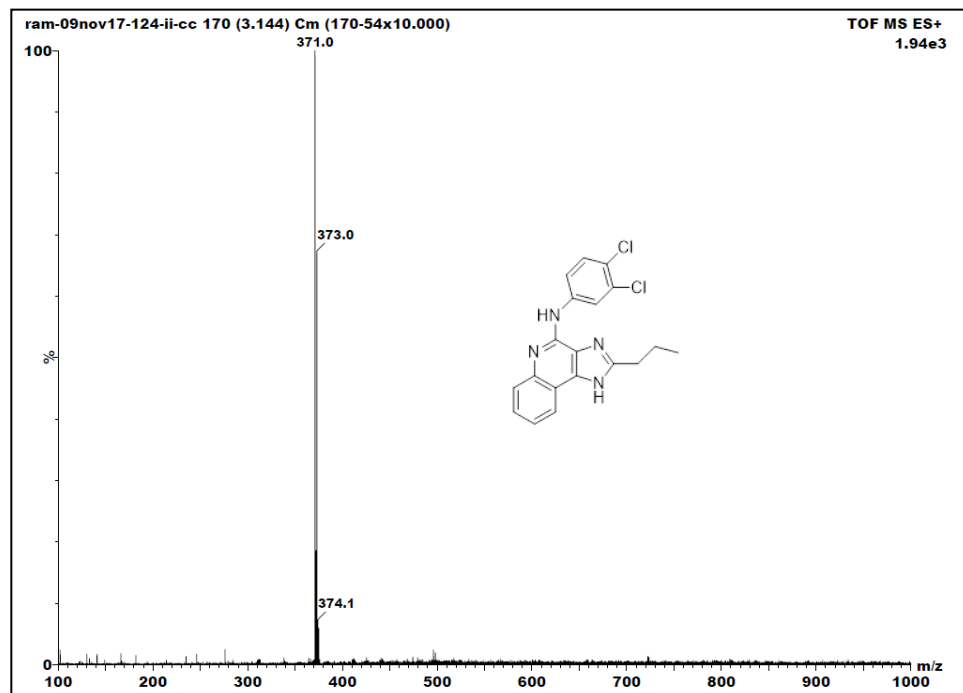

**Elemental Composition Report** Page 1

**Single Mass Analysis**  
Tolerance = 10.0 mDa / DBE: min = -2.0, max = 1000.0  
Element prediction: Off  
Number of isotope peaks used for i-FIT = 3

Monoisotopic Mass, Even Electron Ions  
42 formula(e) evaluated with 3 results within limits (up to 19 closest results for each mass)  
Elements Used:  
C: 0-100 H: 0-200 N: 4-4 O: 0-20 35Cl: 2-2  
09-Nov-2017  
ram-09nov17-124-ii-cc 172 (3.181) Cm (Gen,3, 50.00, Ar); Sm (SG, 3x5.00); Sb (12,5.00) TOF MS ES+  
2.55e+003

| Mass     | Calc. Mass | mDa  | PPM   | DBE  | i-FIT | Formula             |
|----------|------------|------|-------|------|-------|---------------------|
| 371.0827 | 371.0820   | -0.3 | -0.8  | 12.5 | 758.5 | C19 H17 N4 35Cl2    |
|          | 371.0889   | -6.2 | -16.7 | 3.5  | 822.8 | C12 H21 N4 O5 35Cl2 |
|          | 371.0796   | 9.1  | 24.5  | -0.5 | 878.8 | C8 H21 N4 O8 35Cl2  |

TOF MS E+ and elemental analysis of 2-propyl-N-(3,4-dichlorophenyl)-1H-imidazo[4,5-c]quinolin-4-amine – Compound **13**

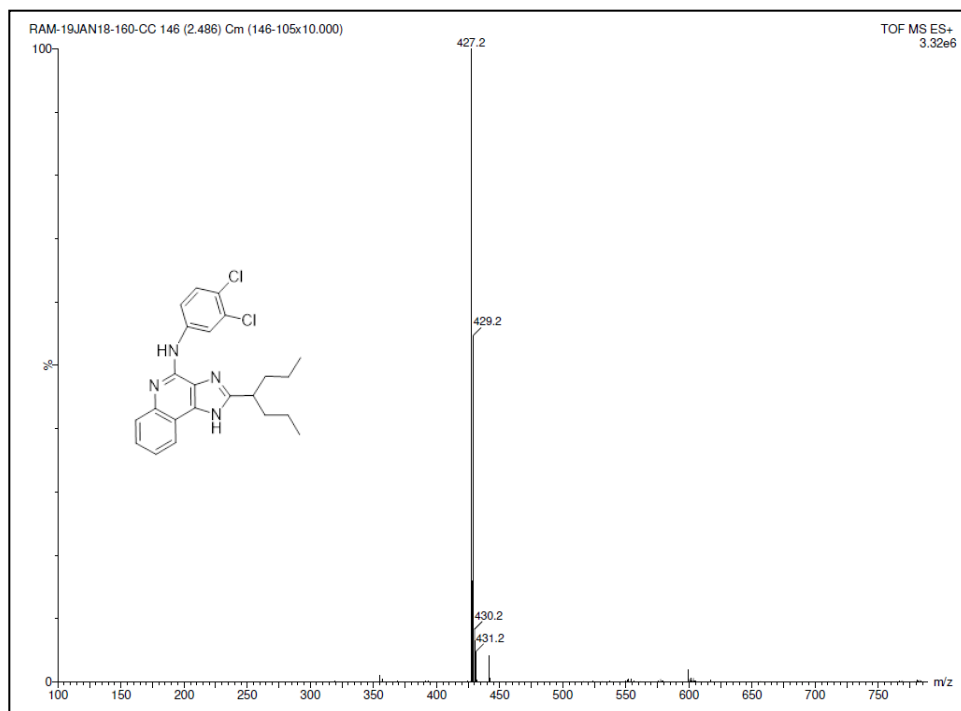

**Elemental Composition Report** Page 1

**Single Mass Analysis**  
 Tolerance = 30.0 mDa / DBE: min = -1.5, max = 100.0  
 Element prediction: Off  
 Number of isotope peaks used for i-FIT = 3

**Monoisotopic Mass, Even Electron Ions**  
 56 formula(e) evaluated with 6 results within limits (up to 50 best isotopic matches for each mass)  
 Elements Used:  
 C: 0-60 H: 0-200 N: 4-4 O: 0-40 35Cl: 2-2  
 RAM-19JAN18-160-CC 146 (2.520) AM (Cen,5, 50.00, Ht,10000.0,0.00,0.70); Sm (SG, 1x2.00); Sb (15,10.00)  
 TOF MS ES+

2.88e+005

Minimum: DBE -1.5  
 Maximum: mDa 30.0 10.0 100.0

| Mass     | Calc. Mass | mDa   | PPM   | DBE  | i-FIT | Norm  | Conf(%) | Formula             |
|----------|------------|-------|-------|------|-------|-------|---------|---------------------|
| 427.1462 | 427.1456   | 0.6   | 1.4   | 12.5 | 225.0 | 2.424 | 8.85    | C23 H25 N4 35Cl2    |
| 427.1515 | 427.1515   | -5.3  | -12.4 | 3.5  | 224.3 | 1.721 | 17.89   | C16 H29 N4 O5 35Cl2 |
| 427.1362 | 427.1362   | 10.0  | 23.4  | -0.5 | 223.9 | 1.371 | 25.38   | C12 H29 N4 O8 35Cl2 |
| 427.1304 | 427.1304   | 15.8  | 37.0  | 8.5  | 224.6 | 2.059 | 12.75   | C19 H25 N4 O3 35Cl2 |
| 427.1668 | 427.1668   | -20.6 | -48.2 | 7.5  | 224.7 | 2.140 | 11.77   | C20 H29 N4 O2 35Cl2 |
| 427.1726 | 427.1726   | -26.4 | -61.8 | -1.5 | 224.0 | 1.454 | 23.36   | C13 H33 N4 O7 35Cl2 |

TOF MS E+ and elemental analysis of 2-(heptan-4-yl)-N-(3,4-dichlorophenyl)-1H-imidazo[4,5-c]quinolin-4-amine – Compound **14**

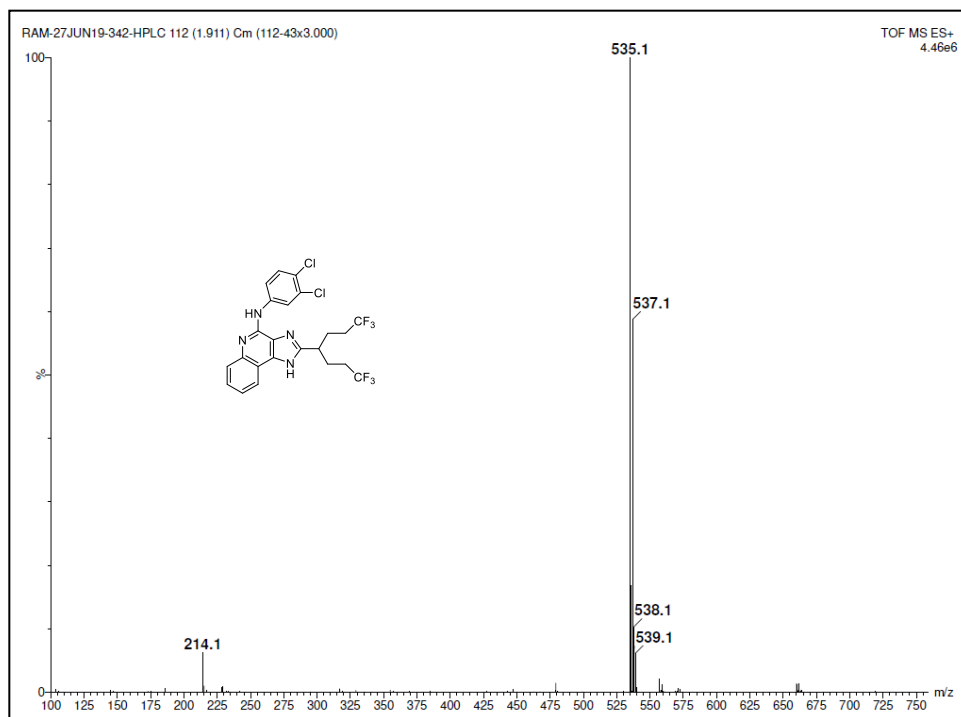

**Elemental Composition Report** Page 1

**Single Mass Analysis**  
Tolerance = 5.0 mDa / DBE: min = -1.5, max = 100.0  
Element prediction: Off  
Number of isotope peaks used for i-FIT = 3

Monoisotopic Mass, Even Electron Ions  
49 formula(e) evaluated with 2 results within limits (up to 50 closest results for each mass)  
Elements Used:  
C: 0-100 H: 0-250 N: 4-4 O: 0-60 F: 6-6 35Cl: 2-2  
RAM-27JUN19-342-HPLC 115 (1.962) AM2 (Ar,25000.0,0.00,0.00); ABS  
TOF MS ES+ 1.62e+006

| Mass     | Calc. Mass | mDa  | PPM  | DBE  | i-FIT | Norm  | Conf(%) | Formula                |
|----------|------------|------|------|------|-------|-------|---------|------------------------|
| 535.0901 | 535.0891   | 1.0  | 1.9  | 12.5 | 482.5 | 0.758 | 46.85   | C23 H19 N4 F6 35Cl2    |
|          | 535.0950   | -4.9 | -9.2 | 3.5  | 482.4 | 0.632 | 53.15   | C16 H23 N4 O5 F6 35Cl2 |

TOF MS E+ and elemental analysis of 2-(1,1,1,7,7,7-hexafluoroheptan-4-yl)-N-(3,4-dichlorophenyl)-1H-imidazo[4,5-c]quinolin-4-amine – Compound **15**

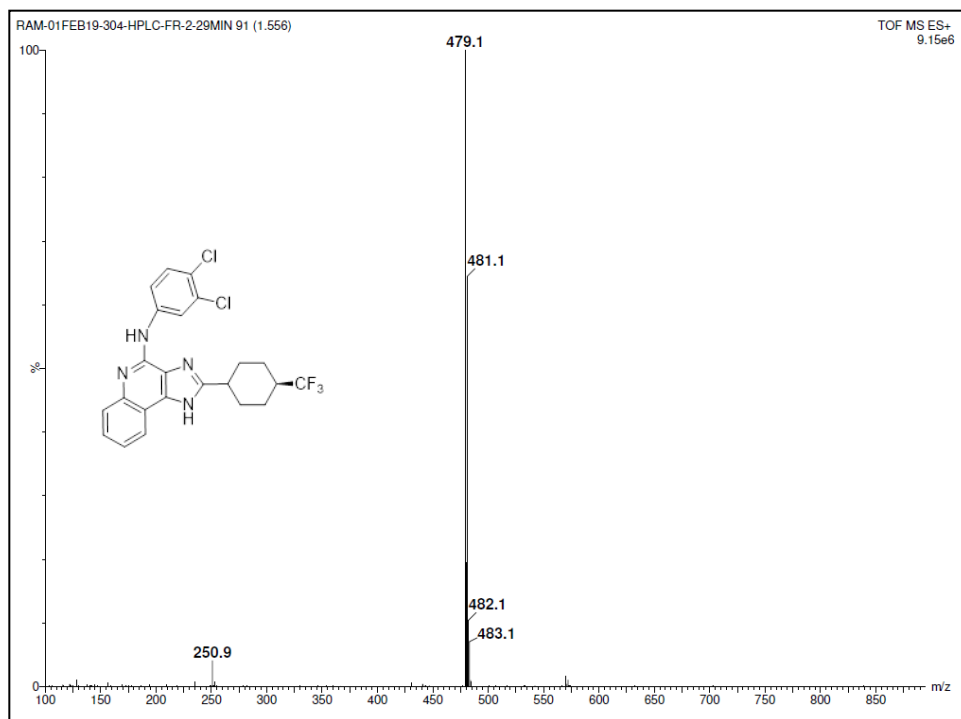

**Elemental Composition Report** Page 1

**Single Mass Analysis**  
Tolerance = 5.0 mDa / DBE: min = -1.5, max = 100.0  
Element prediction: Off  
Number of isotope peaks used for i-FIT = 3

Monoisotopic Mass, Even Electron Ions  
52 formula(e) evaluated with 1 results within limits (up to 50 closest results for each mass)  
Elements Used:  
C: 0-150 H: 0-200 N: 4-4 O: 0-60 F: 3-3 35Cl: 2-2  
RAM-01FEB19-304-HPLC-FR-2-29MIN 174 (2.960) AM2 (Ar,25000.0,0.00,0.00); ABS  
TOF MS ES+ 7.79e+005

| Mass     | Calc. Mass | mDa | PPM | DBE  | i-FIT | Norm | Conf(%) | Formula             |
|----------|------------|-----|-----|------|-------|------|---------|---------------------|
| 479.1019 | 479.1017   | 0.2 | 0.4 | 13.5 | 419.9 | n/a  | n/a     | C23 H20 N4 F3 35Cl2 |

Minimum: -1.5  
Maximum: 5.0 5.0 100.0

TOF MS E+ and elemental analysis of 2-(4-(trifluoromethyl)cyclohexyl)-N-(3,4-dichlorophenyl)-1H-imidazo[4,5-c]quinolin-4-amine – Compound **16**



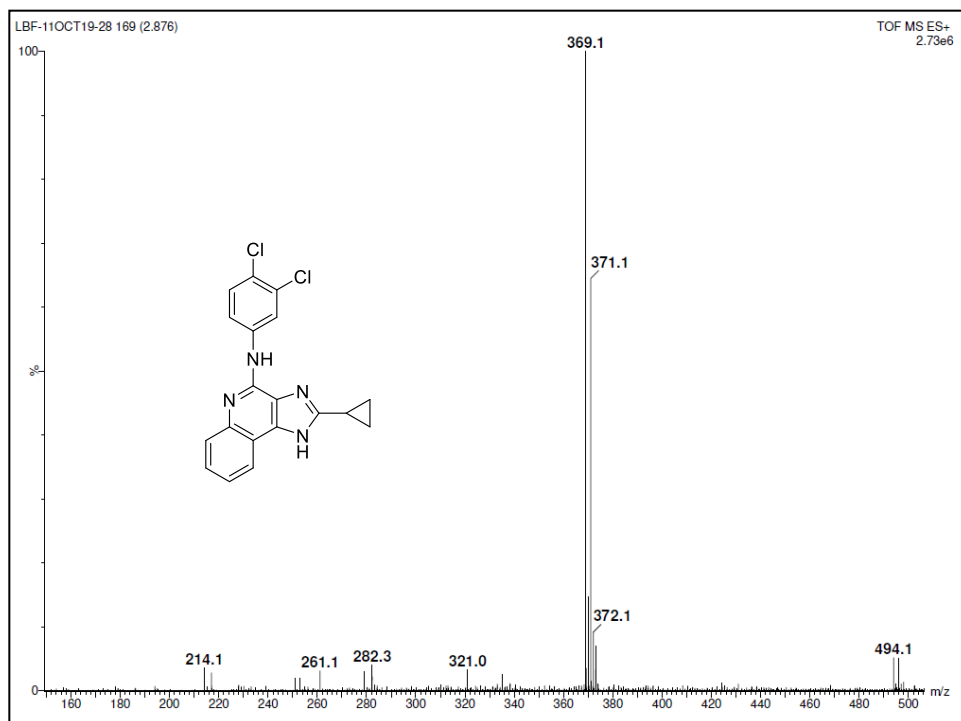

**Elemental Composition Report** Page 1

**Single Mass Analysis**  
Tolerance = 5.0 mDa / DBE: min = -1.5, max = 100.0  
Element prediction: Off  
Number of isotope peaks used for i-FIT = 3

**Monoisotopic Mass, Even Electron Ions**  
43 formula(e) evaluated with 1 results within limits (up to 50 closest results for each mass)  
Elements Used:  
C: 0-100 H: 0-250 N: 4-4 O: 0-60 35Cl: 2-2

LBF-11OCT19-28 171 (2.909) AM2 (Ar,25000.0,0.00,0.00); ABS  
TOF MS ES+ 2.57e+006

Minimum: -1.5  
Maximum: 100.0

| Mass     | Calc. Mass | mDa | PPM | DBE  | i-FIT | Norm | Conf(%) | Formula          |
|----------|------------|-----|-----|------|-------|------|---------|------------------|
| 369.0676 | 369.0674   | 0.2 | 0.5 | 13.5 | 624.3 | n/a  | n/a     | C19 H15 N4 35Cl2 |

TOF MS E+ and elemental analysis of 2-(cyclopropyl)-N-(3,4-dichlorophenyl)-1H-imidazo[4,5-c]quinolin-4-amine – Compound **17**

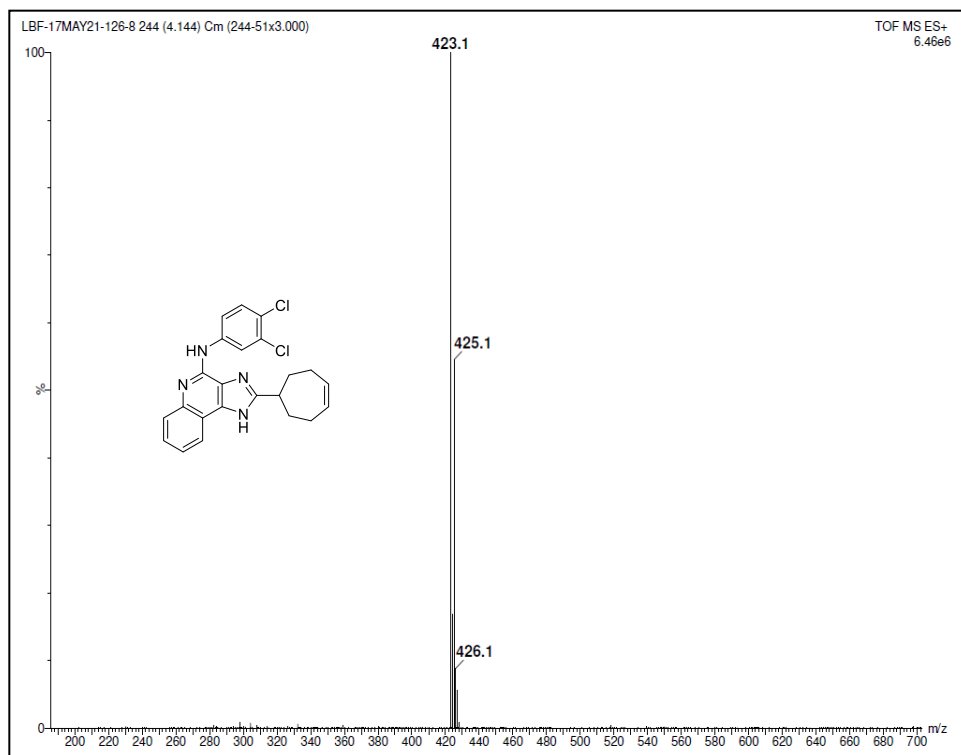

**Elemental Composition Report** Page 1

**Single Mass Analysis**  
Tolerance = 5.0 mDa / DBE: min = -1.5, max = 100.0  
Element prediction: Off  
Number of isotope peaks used for i-FIT = 3

Monoisotopic Mass, Even Electron Ions  
55 formula(e) evaluated with 1 results within limits (up to 50 closest results for each mass)  
Elements Used:  
C: 0-100 H: 0-250 N: 4-4 O: 0-50 <sup>35</sup>Cl: 2-2

LBF-17MAY21-126-8 248 (4.212) AM2 (Ar,25000.0,0.00,0.00); ABS  
TOF MS ES+ 2.03e+006

Mass spectrum peaks (m/z): 409.4, 410.1, 414.2, 416.3, 418.3, 421.1, 423.1, 425.1, 426.1, 428.1, 429.3, 432.3, 433.4, 437.9, 440.1, 441.3, 442.3, 444.2, 447.4

| Mass     | Calc. Mass | mDa  | PPM  | DBE  | i-FIT | Norm | Conf(%) | Formula          |
|----------|------------|------|------|------|-------|------|---------|------------------|
| 423.1137 | 423.1143   | -0.6 | -1.4 | 14.5 | 544.1 | n/a  | n/a     | C23 H21 N4 35Cl2 |

TOF MS ES+ and elemental analysis of 2-(cyclohept-4-en-1-yl)-N-(3,4-dichlorophenyl)-1H-imidazo[4,5-c]quinolin-4-amine – Compound **18**

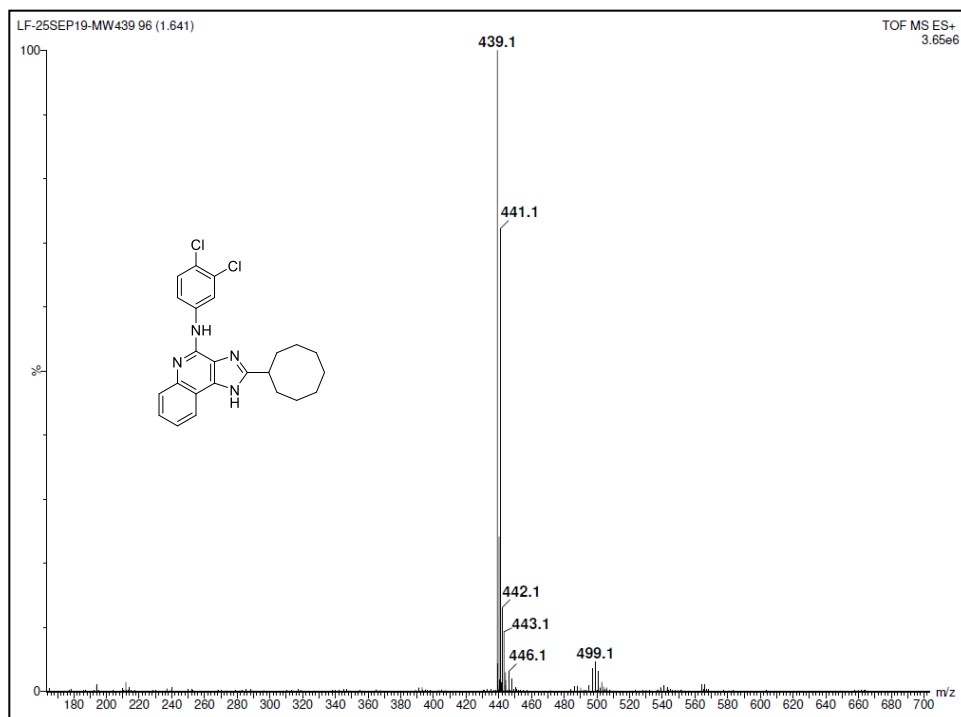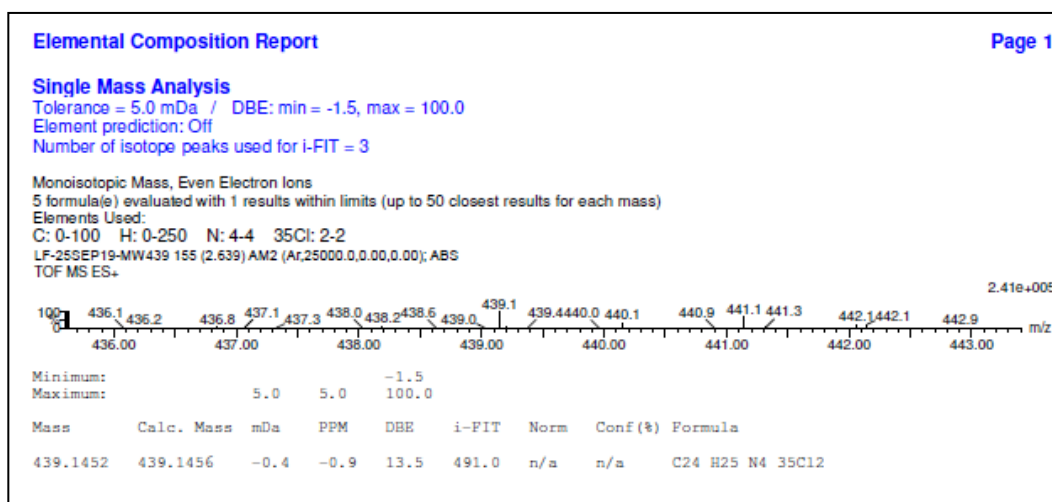

TOF MS E+ and elemental analysis of 2-(cyclooctyl)-*N*-(3,4-dichlorophenyl)-1*H*-imidazo[4,5-*c*]quinolin-4-amine – Compound **19**

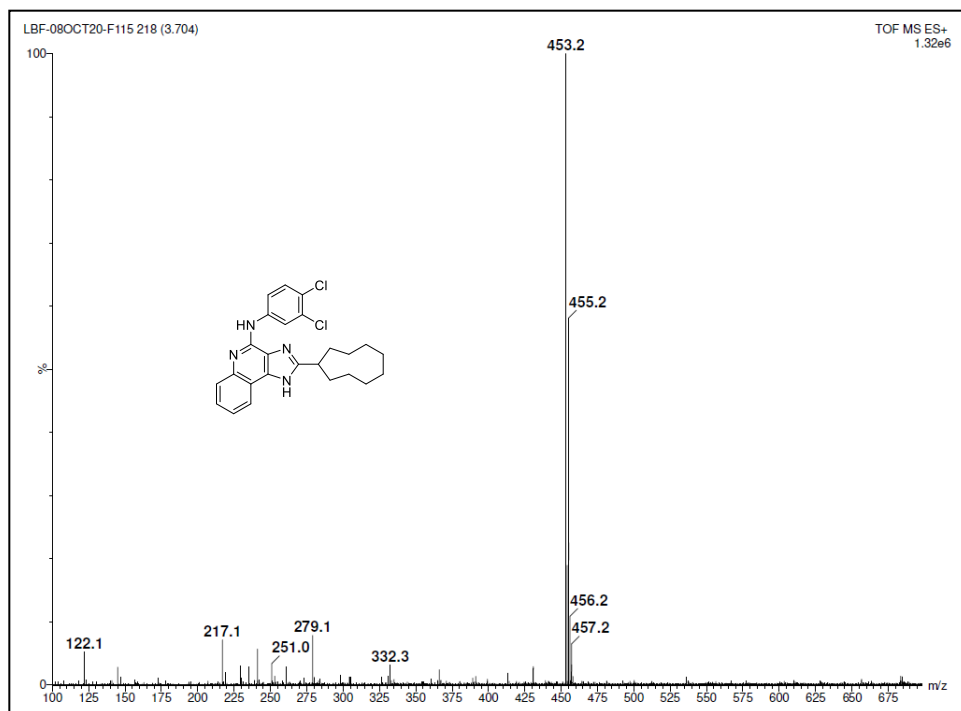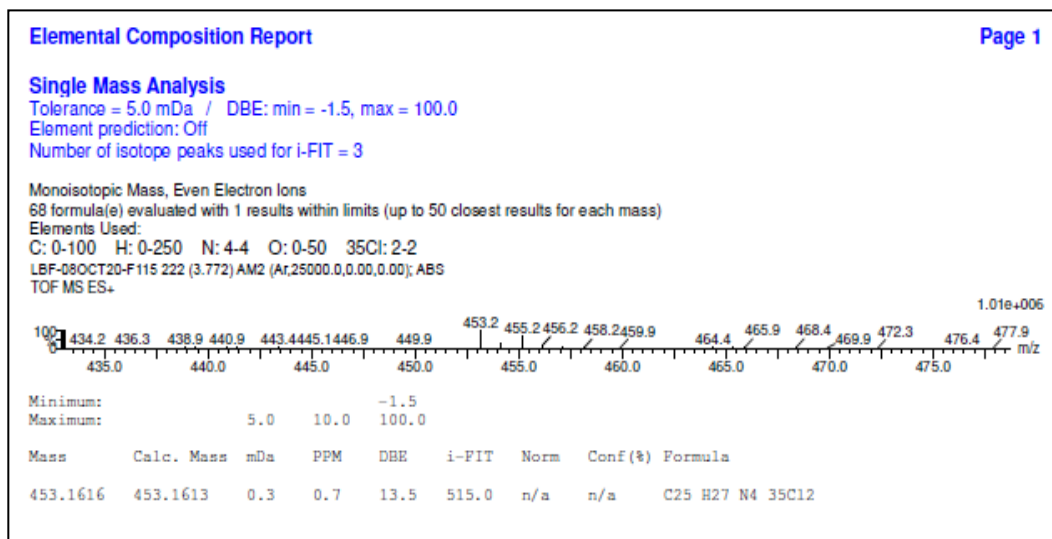

TOF MS E+ and elemental analysis of 2-(cyclohexonyl)-*N*-(3,4-dichlorophenyl)-1*H*-imidazo[4,5-*c*]quinolin-4-amine – Compound **20**

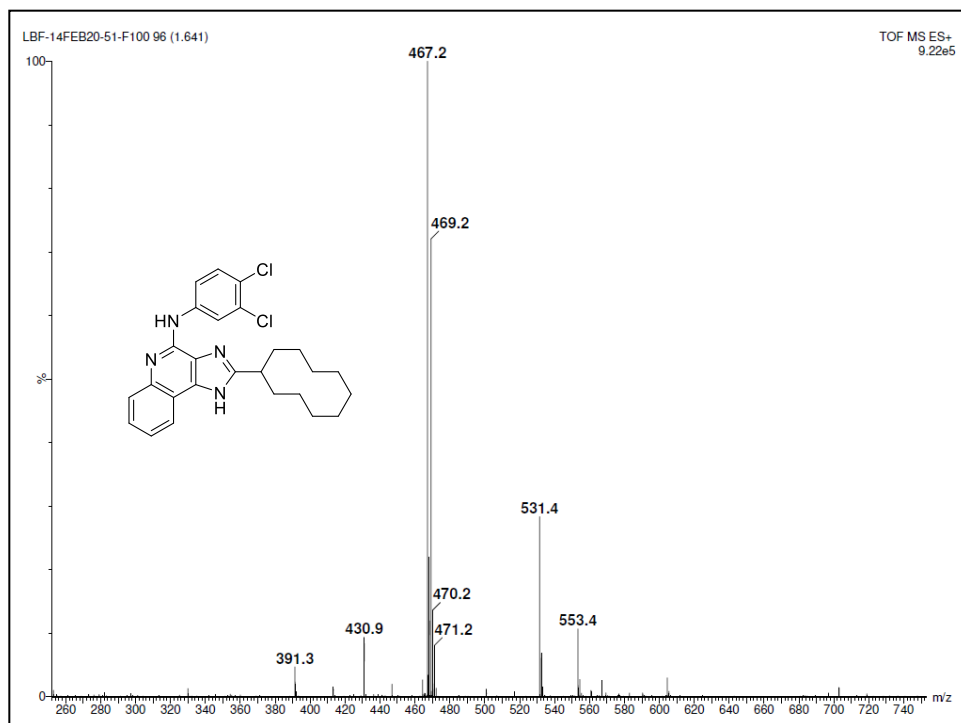

**Elemental Composition Report** Page 1

**Single Mass Analysis**  
Tolerance = 5.0 mDa / DBE: min = -1.5, max = 100.0  
Element prediction: Off  
Number of isotope peaks used for i-FIT = 3

Monoisotopic Mass, Even Electron Ions  
69 formula(e) evaluated with 1 results within limits (up to 50 closest results for each mass)  
Elements Used:  
C: 0-100 H: 0-250 N: 4-4 O: 0-60 35Cl: 2-2  
LBF-14FEB20-51-F100 99 (1.691) AM2 (Ar,25000.0,0.00,0.00); ABS  
TOF MS ES+

Minimum: 8.22e+006  
Maximum: 100.0

| Mass     | Calc. Mass | mDa | PPM | DBE  | i-FIT | Norm | Conf(%) | Formula          |
|----------|------------|-----|-----|------|-------|------|---------|------------------|
| 467.1770 | 467.1769   | 0.1 | 0.2 | 13.5 | 580.2 | n/a  | n/a     | C26 H29 N4 35Cl2 |

TOF MS ES+ and elemental analysis of 2-(cyclodecyl)-*N*-(3,4-dichlorophenyl)-1*H*-imidazo[4,5-*c*]quinolin-4-amine – Compound **21**

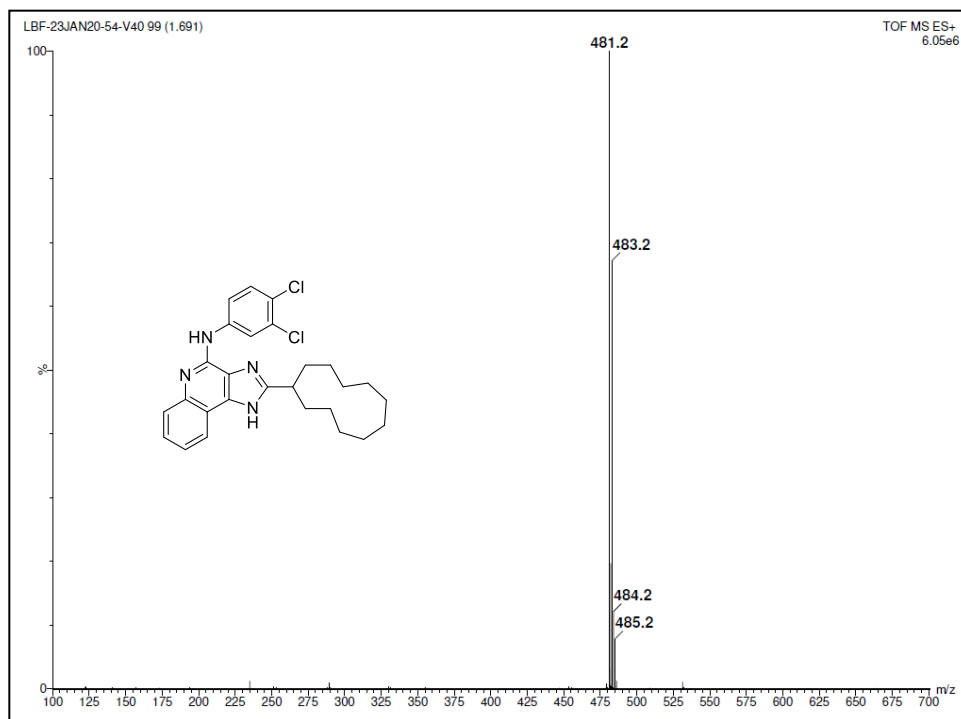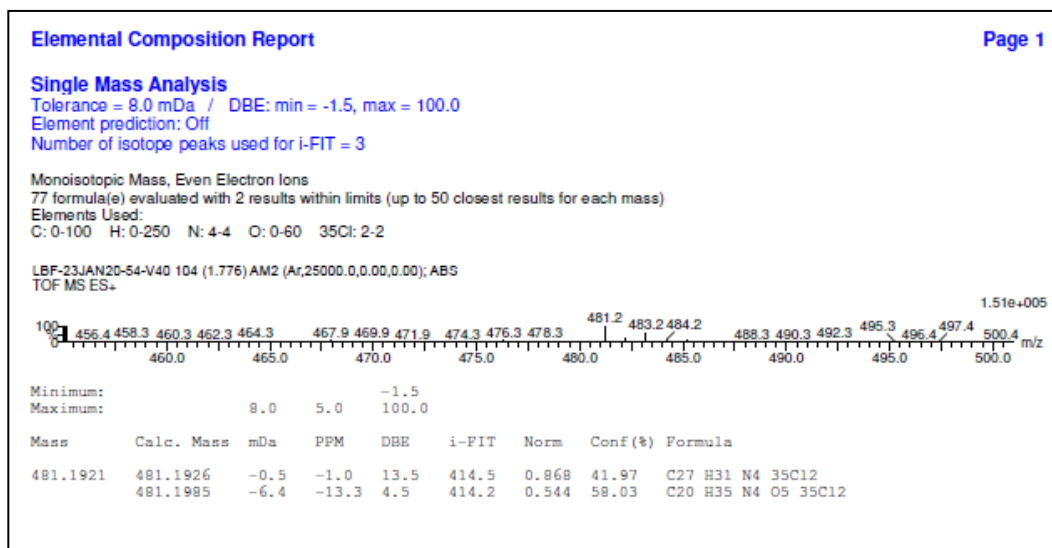

TOF MS ES+ and elemental analysis of 2-(cycloundecyl)-*N*-(3,4-dichlorophenyl)-1*H*-imidazo[4,5-*c*]quinolin-4-amine – Compound **22**

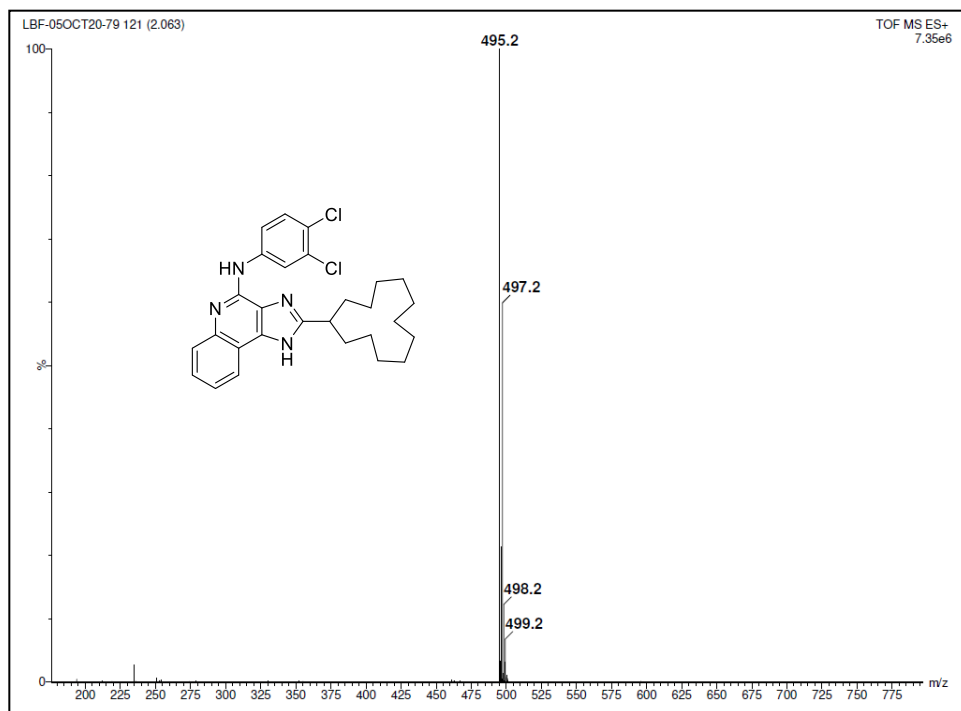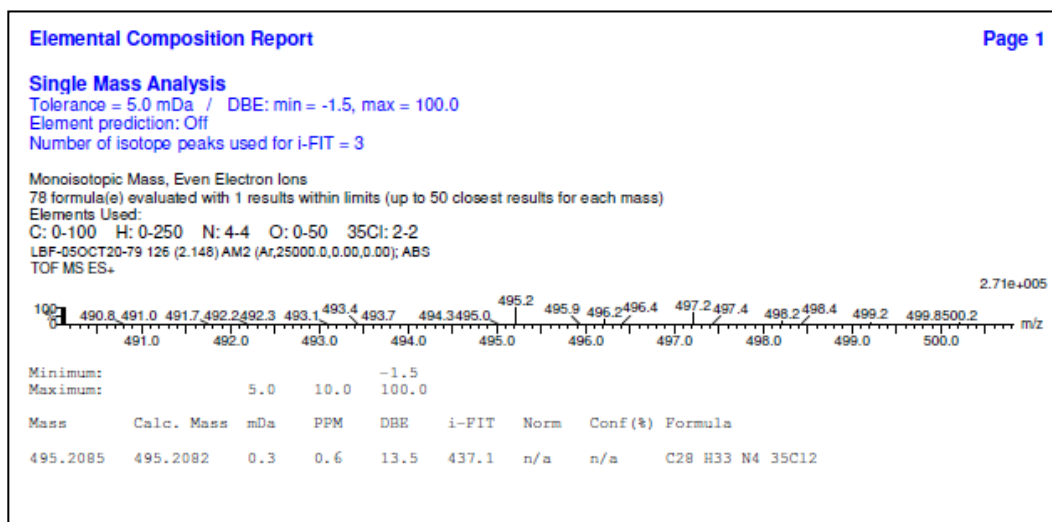

TOF MS ES+ and elemental analysis of 2-(cyclododecyl)-*N*-(3,4-dichlorophenyl)-1*H*-imidazo[4,5-*c*]quinolin-4-amine – Compound **23**

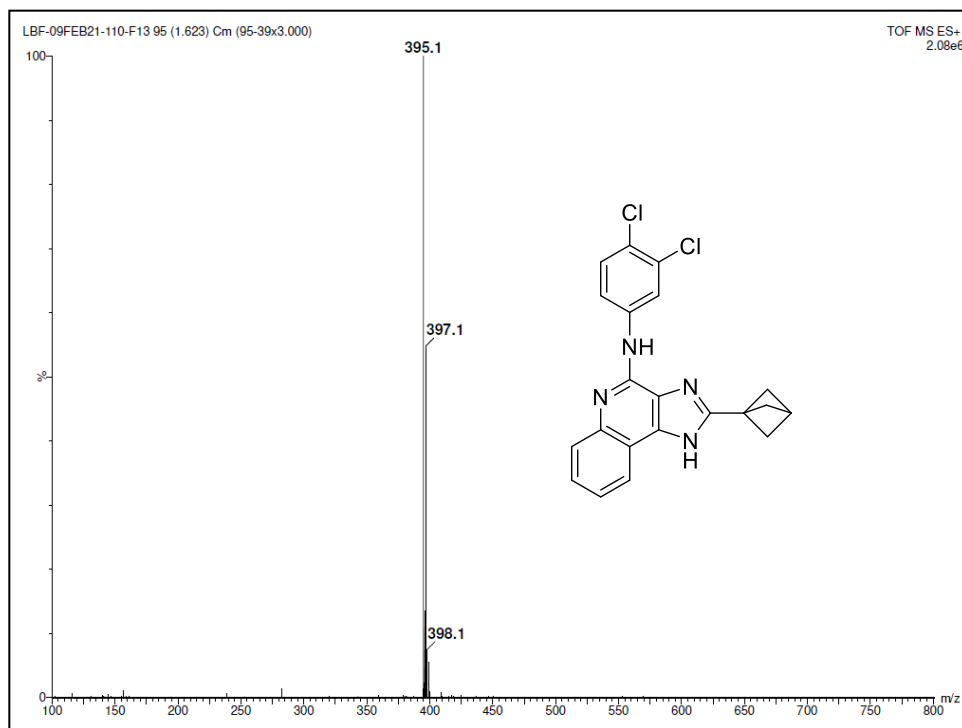

## Elemental Composition Report

Page 1

## Single Mass Analysis

Tolerance = 5.0 mDa / DBE: min = -1.5, max = 100.0

Element prediction: Off

Number of isotope peaks used for i-FIT = 3

Monoisotopic Mass, Even Electron Ions

47 formula(e) evaluated with 1 results within limits (up to 50 closest results for each mass)

Elements Used:

C: 0-100 H: 0-250 N: 4-4 O: 0-50 35Cl: 2-2

LBF-09FEB21-110-F13 103 (1.759) AM2 (Ar,25000.0,0.00,0.00): ABS

TOF MS ES+

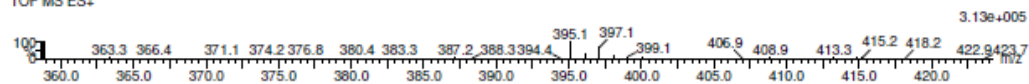

Minimum: -1.5  
Maximum: 5.0 10.0 100.0

| Mass     | Calc. Mass | mDa | PPM | DBE  | i-FIT | Norm | Conf(%) | Formula          |
|----------|------------|-----|-----|------|-------|------|---------|------------------|
| 395.0835 | 395.0830   | 0.5 | 1.3 | 14.5 | 528.2 | n/a  | n/a     | C21 H17 N4 35Cl2 |

TOF MS ES+ and elemental analysis of 2-(bicyclo[1.1.1]heptan-1-yl)-*N*-(3,4-dichlorophenyl)-1*H*-imidazo[4,5-*c*]quinolin-4-amine – Compound **24**



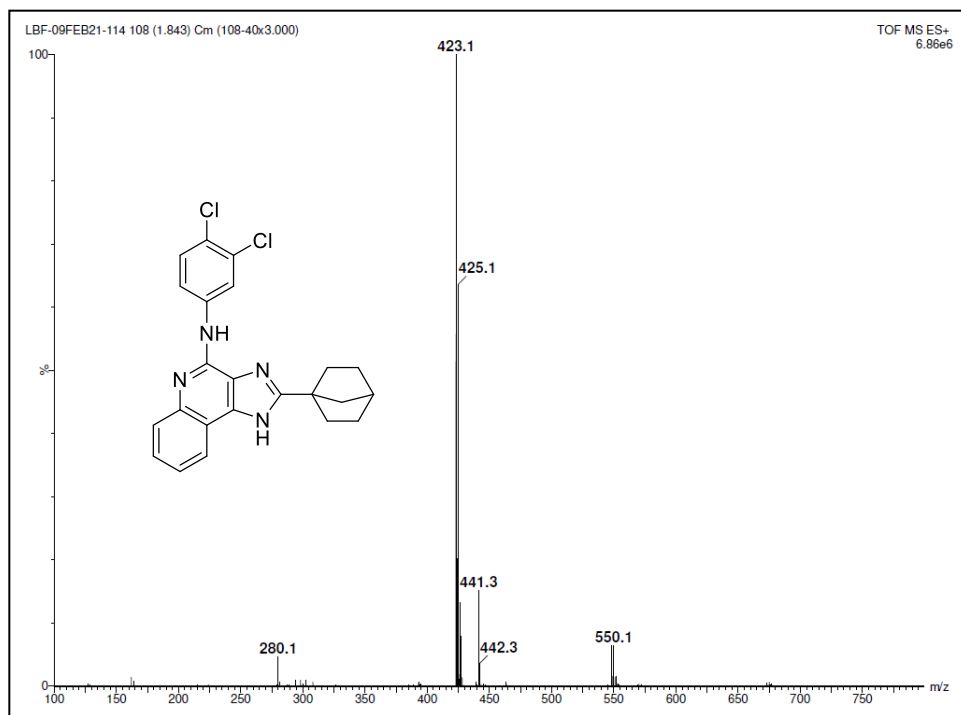

## Elemental Composition Report

Page 1

## Single Mass Analysis

Tolerance = 5.0 mDa / DBE: min = -1.5, max = 100.0

Element prediction: Off

Number of isotope peaks used for i-FIT = 3

Monoisotopic Mass, Even Electron Ions

55 formula(e) evaluated with 1 results within limits (up to 50 closest results for each mass)

Elements Used:

C: 0-100 H: 0-250 N: 4-4 O: 0-50 35Cl: 2-2

LBF-09FEB21-114 117 (1.996) AM2 (Ar,25000.0,0.00,0.00); ABS

TOF MS ES+

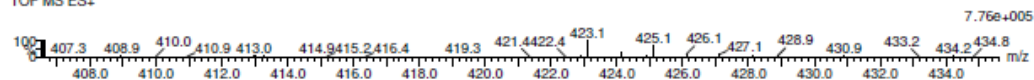

Minimum: -1.5  
Maximum: 5.0 10.0 100.0

| Mass     | Calc. Mass | mDa  | PPM  | DBE  | i-FIT | Norm | Conf(%) | Formula          |
|----------|------------|------|------|------|-------|------|---------|------------------|
| 423.1140 | 423.1143   | -0.3 | -0.7 | 14.5 | 543.9 | n/a  | n/a     | C23 H21 N4 35Cl2 |

TOF MS E+ and elemental analysis of 2-(bicyclo[2.2.1]heptan-1-yl)-N-(3,4-dichlorophenyl)-1H-imidazo[4,5-c]quinolin-4-amine – Compound **25**

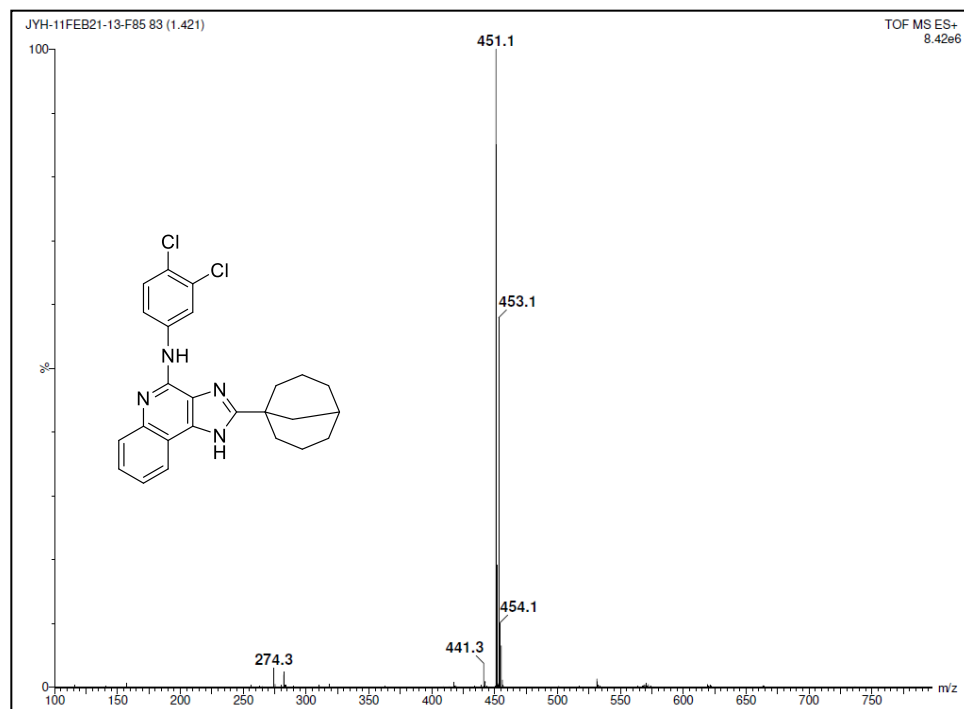

**Elemental Composition Report** Page 1

**Single Mass Analysis**  
Tolerance = 5.0 mDa / DBE: min = -1.5, max = 100.0  
Element prediction: Off  
Number of isotope peaks used for i-FIT = 3

Monoisotopic Mass, Even Electron Ions  
64 formula(e) evaluated with 1 results within limits (up to 50 closest results for each mass)  
Elements Used:  
C: 0-100 H: 0-250 N: 4-4 O: 0-50 35Cl: 2-2  
JYH-11FEB21-13-F85 157 (2.672) AM2 (Ar,25000.0,0.00,0.00); ABS  
TOF MS ES+ 2.75e+005

Mass spectrum peaks (m/z): 431.3, 432.3, 434.2, 438.9, 440.9, 441.9, 445.1, 449.9, 451.1, 453.1, 454.1, 456.1, 459.9, 462.9, 466.0, 468.4, 472.2, 473.2, 475.9, 476.5.

| Mass     | Calc. Mass | mDa  | PPM  | DBE  | i-FIT | Norm | Conf (%) | Formula          |
|----------|------------|------|------|------|-------|------|----------|------------------|
| 451.1452 | 451.1456   | -0.4 | -0.9 | 14.5 | 428.8 | n/a  | n/a      | C25 H25 N4 35Cl2 |

TOF MS ES+ and elemental analysis of 2-(bicyclo[3.3.1]nonan-1-yl)-*N*-(3,4-dichlorophenyl)-1*H*-imidazo[4,5-*c*]quinolin-4-amine – Compound **26**

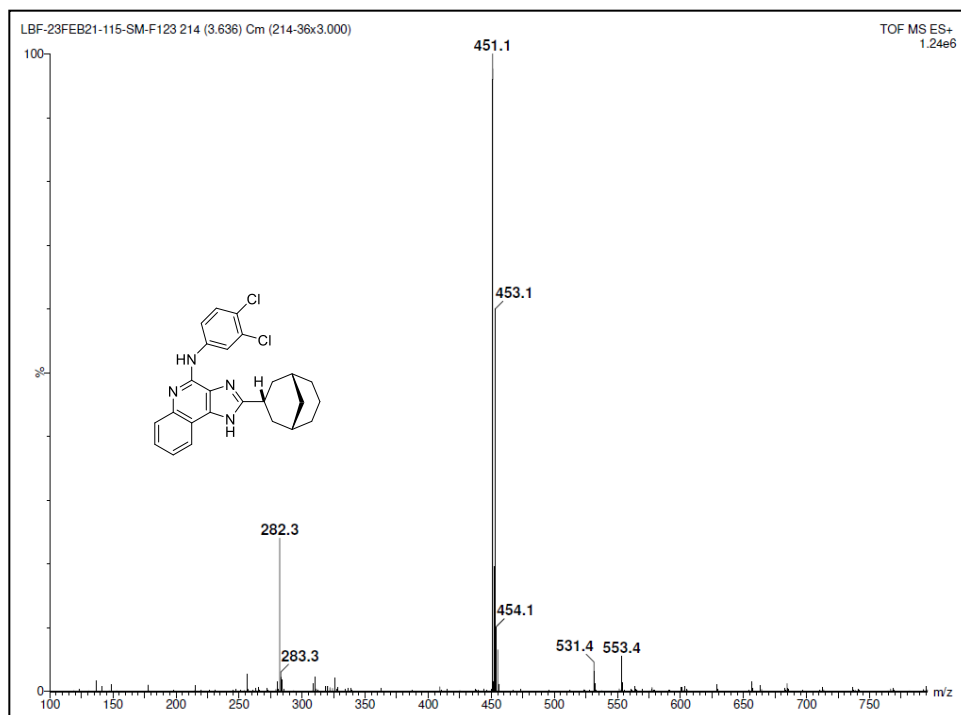

**Elemental Composition Report** Page 1

**Single Mass Analysis**  
Tolerance = 5.0 mDa / DBE: min = -1.5, max = 100.0  
Element prediction: Off  
Number of isotope peaks used for i-FIT = 3

Monoisotopic Mass, Even Electron Ions  
64 formula(e) evaluated with 1 results within limits (up to 50 closest results for each mass)  
Elements Used:  
C: 0-100 H: 0-250 N: 4-4 O: 0-50 35Cl: 2-2  
LBF-23FEB21-115-SM-F123 226 (3.839) AM2 (Ar,25000.0,0.00,0.00); ABS  
TOF MS ES+ 3.29e+005

Mass spectrum peaks (m/z): 445.2, 445.8, 446.8, 447.8, 448.9, 449.9, 450.2, 451.1, 452.1, 453.1, 454.1, 455.1, 456.1, 457.2, 458.3, 458.8, 459.1, 459.6

| Mass     | Calc. Mass | mDa | PPM | DBE  | i-FIT | Norm | Conf (%) | Formula          |
|----------|------------|-----|-----|------|-------|------|----------|------------------|
| 451.1460 | 451.1456   | 0.4 | 0.9 | 14.5 | 474.5 | n/a  | n/a      | C25 H25 N4 35Cl2 |

TOF MS ES+ and elemental analysis of 2-((1R,3s,5S)-bicyclo[3.3.1]nonan-3-yl)-N-(3,4-dichlorophenyl)-1H-imidazo[4,5-c]quinolin-4-amine – Compound **27**

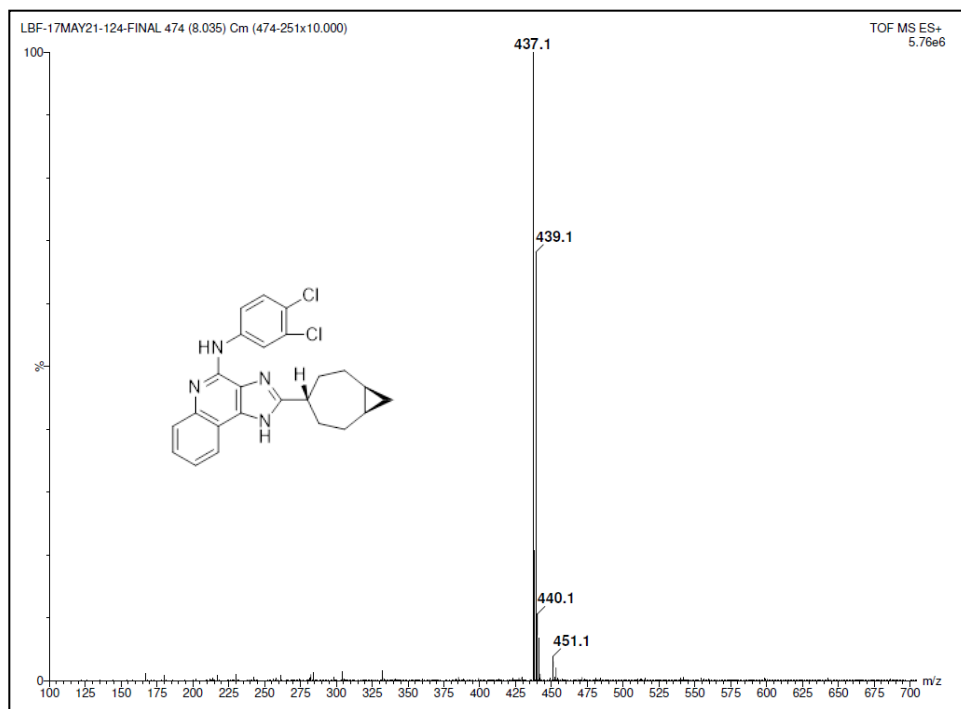

**Elemental Composition Report** Page 1

**Single Mass Analysis**  
Tolerance = 5.0 mDa / DBE: min = -1.5, max = 100.0  
Element prediction: Off  
Number of isotope peaks used for i-FIT = 3

Monoisotopic Mass, Even Electron Ions  
63 formula(e) evaluated with 1 results within limits (up to 50 closest results for each mass)  
Elements Used:  
C: 0-100 H: 0-250 N: 4-4 O: 0-50 35Cl: 2-2

LBF-17MAY21-124-FINAL 479 (8.119) AM2 (Ar,25000.0,0.00,0.00); ABS  
TOF MS ES+

100 414.8 416.3 418.3 421.2 424.4 426.3 429.3 433.4 437.1 439.1 440.1 443.2 444.3 448.2 451.1 452.4 453.1 457.4 460.3 460.8

415.0 420.0 425.0 430.0 435.0 440.0 445.0 450.0 455.0 460.0 m/z

Minimum: -1.5  
Maximum: 100.0

| Mass     | Calc. Mass | mDa | PPM | DBE  | i-FIT | Norm | Conf(%) | Formula          |
|----------|------------|-----|-----|------|-------|------|---------|------------------|
| 437.1304 | 437.1300   | 0.4 | 0.9 | 14.5 | 476.3 | n/a  | n/a     | C24 H23 N4 35Cl2 |

TOF MS ES+ and elemental analysis of 2-((1R,4r,7S)-bicyclo[5.1.0]octan-4-yl)-N-(3,4-dichlorophenyl)-1H-imidazo[4,5-c]quinolin-4-amine – Compound **28**

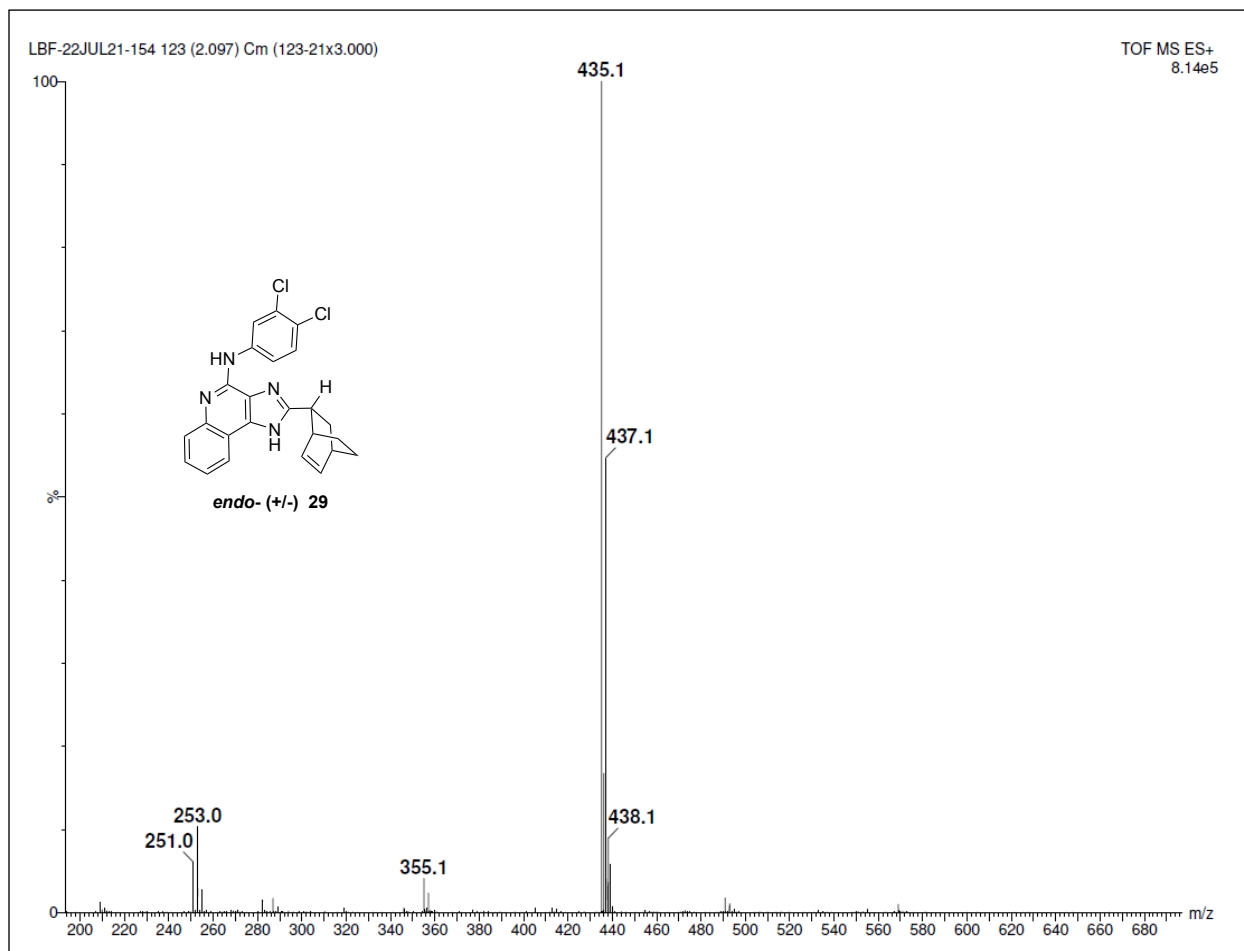

**Elemental Composition Report** Page 1

**Single Mass Analysis**  
Tolerance = 5.0 mDa / DBE: min = -1.5, max = 100.0  
Element prediction: Off  
Number of isotope peaks used for i-FIT = 3

Monoisotopic Mass, Even Electron Ions  
59 formula(e) evaluated with 1 results within limits (up to 50 closest results for each mass)  
Elements Used:  
C: 0-100 H: 0-250 N: 4-4 O: 0-20 35Cl: 2-2

LBF-22JUL21-154 116 (1.979) AM2 (Ar,25000.0,0.00,0.00); ABS  
TOF MS ES+

Minimum: -1.5  
Maximum: 100.0

| Mass     | Calc. Mass | mDa  | PPM  | DBE  | 1-FIT | Norm | Conf(%) | Formula                                                          |
|----------|------------|------|------|------|-------|------|---------|------------------------------------------------------------------|
| 435.1136 | 435.1143   | -0.7 | -1.6 | 15.5 | 509.0 | n/a  | n/a     | C <sub>24</sub> H <sub>21</sub> N <sub>4</sub> 35Cl <sub>2</sub> |

TOF MS ES+ and elemental analysis of 2-((1R,2R,4R) & (1S,2S,4S)-bicyclo[2.2.2]oct-5-en-2-yl)-N-(3,4-dichlorophenyl)-1H-imidazo[4,5-c]quinolin-4-amine – Compound **29**

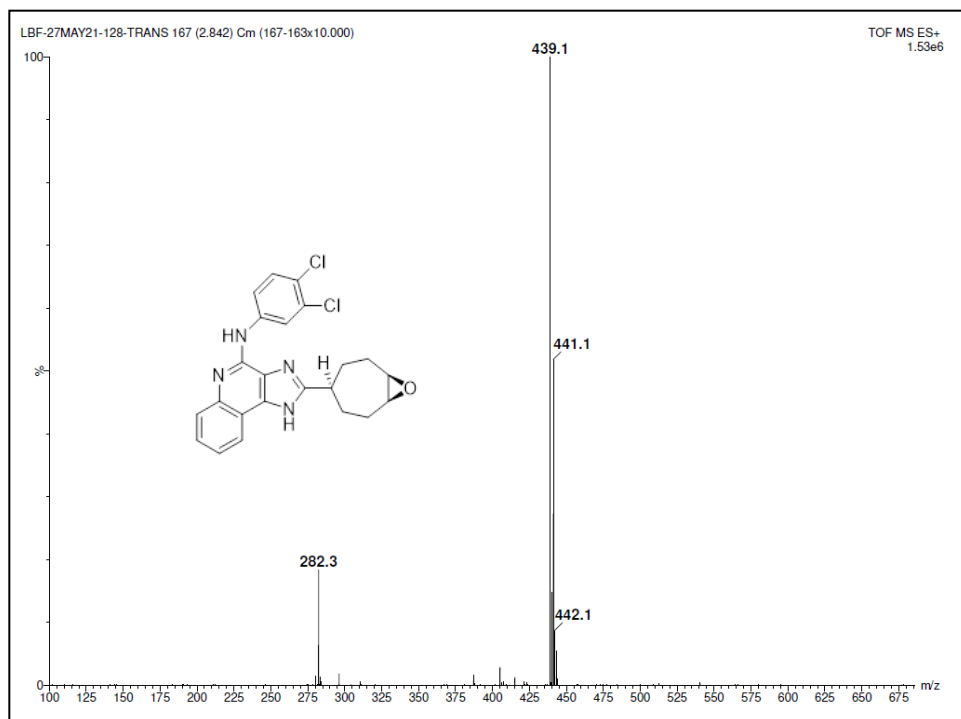

**Elemental Composition Report** Page 1

**Single Mass Analysis**  
Tolerance = 5.0 mDa / DBE: min = -1.5, max = 100.0  
Element prediction: Off  
Number of isotope peaks used for i-FIT = 3

Monoisotopic Mass, Even Electron Ions  
60 formula(e) evaluated with 1 results within limits (up to 50 closest results for each mass)  
Elements Used:  
C: 0-100 H: 0-250 N: 4-4 O: 0-50 <sup>35</sup>Cl: 2-2  
LBF-27MAY21-128-TRANS 166 (2.825) AM2 (Ar,25000.0,0.00,0.00); ABS  
TOF MS ES+ 5.93e+006

Mass spectrum peaks (m/z): 427.3, 429.2, 430.9, 432.3, 434.2, 435.2, 437.2, 439.1, 441.1, 442.1, 444.1, 445.1, 448.2, 449.2, 452.4, 453.2, 455.3, 457.4, 459.5

| Mass     | Calc. Mass | mDa | PPM | DBE  | i-FIT | Norm | Conf(%) | Formula            |
|----------|------------|-----|-----|------|-------|------|---------|--------------------|
| 439.1093 | 439.1092   | 0.1 | 0.2 | 14.5 | 716.2 | n/a  | n/a     | C23 H21 N4 O 35Cl2 |

TOF MS ES+ and elemental analysis of 2-((1R,4r,7S)-8-oxabicyclo[5.1.0]octan-4-yl)-N-(3,4-dichlorophenyl)-1H-imidazo[4,5-c]quinolin-4-amine – Compound **30**

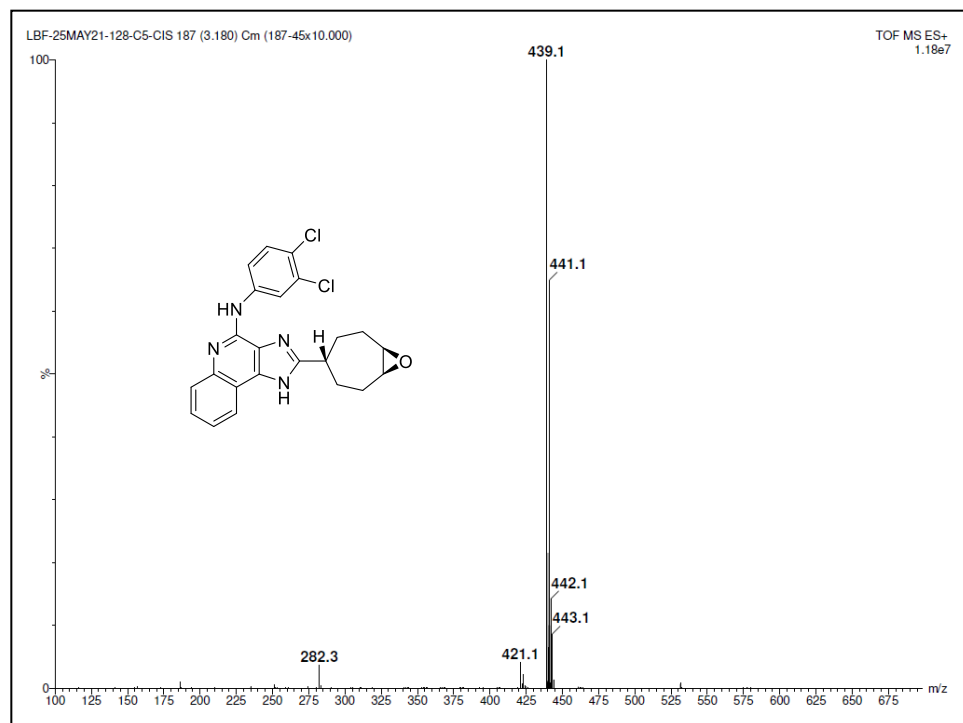

**Elemental Composition Report** Page 1

**Single Mass Analysis**  
Tolerance = 5.0 mDa / DBE: min = -1.5, max = 100.0  
Element prediction: Off  
Number of isotope peaks used for i-FIT = 3

Monoisotopic Mass, Even Electron Ions  
60 formula(e) evaluated with 1 results within limits (up to 50 closest results for each mass)  
Elements Used:  
C: 0-100 H: 0-250 N: 4-4 O: 0-50 35Cl: 2-2  
LBF-25MAY21-128-C5-CIS 191 (3.248) AM2 (Ar,25000.0,0.00,0.00); ABS  
TOF MS ES+ 1.59e+006

Mass spectrum peaks (m/z): 427.4, 428.9, 430.9, 433.4, 434.4, 436.4, 438.4, 439.1, 441.1, 442.1, 444.1, 446.9, 448.9, 450.3, 452.3, 453.3, 454.9, 458.3, 460.3, 461.1

| Mass     | Calc. Mass | mDa  | PPM  | DBE  | i-FIT | Norm | Conf(%) | Formula            |
|----------|------------|------|------|------|-------|------|---------|--------------------|
| 439.1090 | 439.1092   | -0.2 | -0.5 | 14.5 | 481.6 | n/a  | n/a     | C23 H21 N4 O 35Cl2 |

TOF MS ES+ and elemental analysis of 2-((1R,4s,7S)-8-oxabicyclo[5.1.0]octan-4-yl)-N-(3,4-dichlorophenyl)-1H-imidazo[4,5-c]quinolin-4-amine – Compound **31**

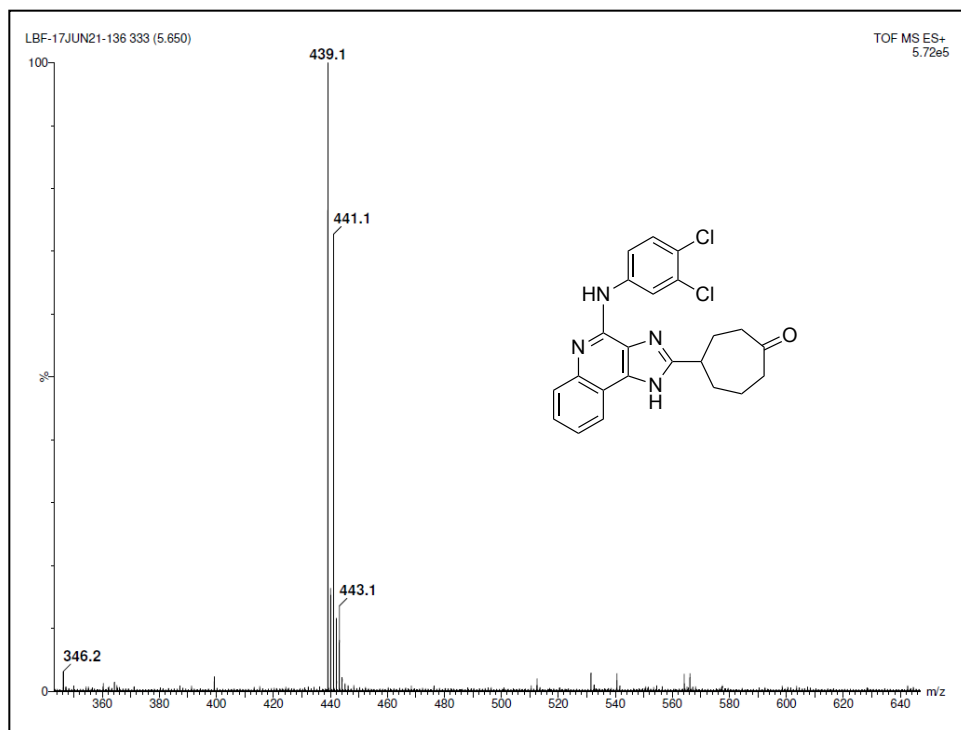

**Elemental Composition Report** Page 1

**Single Mass Analysis**  
 Tolerance = 5.0 mDa / DBE: min = -1.5, max = 100.0  
 Element prediction: Off  
 Number of isotope peaks used for i-FIT = 3

Monoisotopic Mass, Even Electron Ions  
 60 formula(e) evaluated with 1 results within limits (up to 50 closest results for each mass)  
 Elements Used:  
 C: 0-100 H: 0-250 N: 4-4 O: 0-50 35Cl: 2-2  
 LBF-17JUN21-136 329 (5.582) AM2 (Ar,25000.0,0.00,0.00); ABS  
 TOF MS ES+

Mass spectrum peaks (m/z): 409.2, 413.3, 415.2, 421.2, 427.3, 429.3, 430.9, 437.2, 439.1, 441.1, 444.1, 447.3, 455.3, 457.3, 461.1, 463.1, 471.4, 473.3, 481.3, 482.4, 487.4

| Mass     | Calc. Mass | mDa | PPM | DBE  | i-FIT | Norm | Conf(%) | Formula            |
|----------|------------|-----|-----|------|-------|------|---------|--------------------|
| 439.1100 | 439.1092   | 0.8 | 1.8 | 14.5 | 626.8 | n/a  | n/a     | C23 H21 N4 O 35Cl2 |

Minimum: -1.5  
 Maximum: 100.0

TOF MS ES+ and elemental analysis of (R)- & (S)-4-(4-((3,4-dichlorophenyl)amino)-1*H*-imidazo[4,5-*c*]quinolin-2-yl)cycloheptan-1-one – Compound **32**



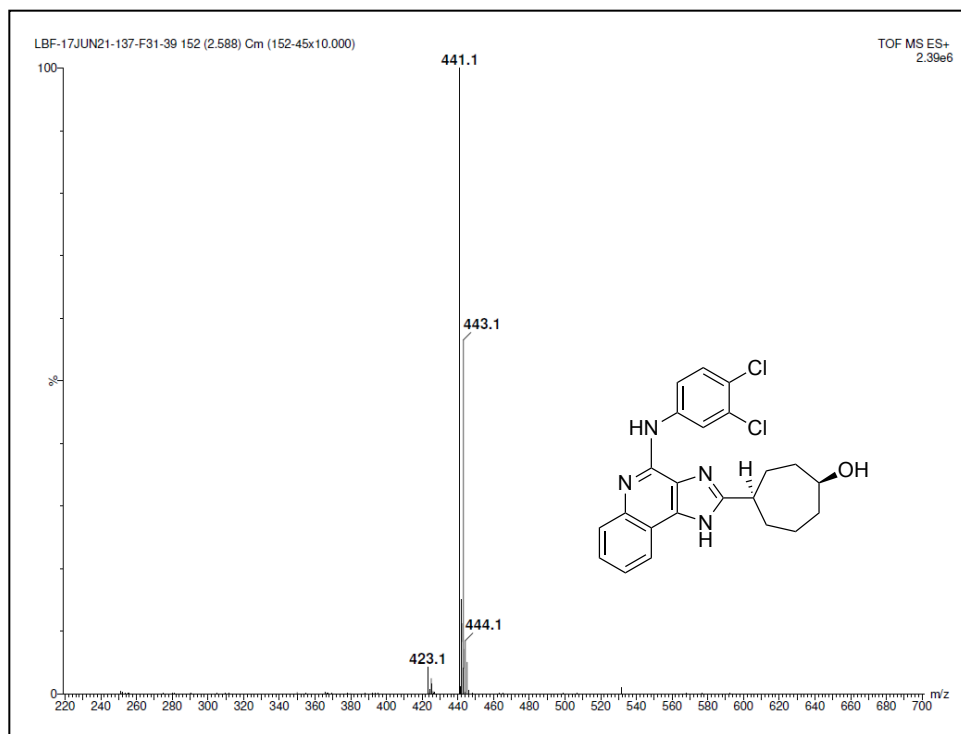

**Elemental Composition Report** Page 1

**Single Mass Analysis**  
Tolerance = 5.0 mDa / DBE: min = -1.5, max = 100.0  
Element prediction: Off  
Number of isotope peaks used for i-FIT = 3

Monoisotopic Mass, Even Electron Ions  
64 formula(s) evaluated with 1 results within limits (up to 50 closest results for each mass)  
Elements Used:  
C: 0-100 H: 0-250 N: 4-4 O: 0-50 35Cl: 2-2  
LBF-17JUN21-137-F31-39 152 (2.588) AM2 (Ar,25000.0,0.00,0.00); ABS  
TOF MS ES+ 5.95e+006

434.2 436.3 436.9 437.2 439.2 441.1 443.1 444.1 445.1 446.9 448.2 450.3 452.3 452.8 454.3 455.3 457.4 458.3 459.1

434.0 436.0 438.0 440.0 442.0 444.0 446.0 448.0 450.0 452.0 454.0 456.0 458.0 460.0

Minimum: 5.0 5.0 -1.5  
Maximum: 5.0 5.0 100.0

| Mass     | Calc. Mass | mDa  | PPM  | DBE  | i-FIT | Norm | Conf (%) | Formula            |
|----------|------------|------|------|------|-------|------|----------|--------------------|
| 441.1247 | 441.1249   | -0.2 | -0.5 | 13.5 | 577.2 | n/a  | n/a      | C23 H23 N4 O 35Cl2 |

TOF MS ES+ and elemental analysis (1R,4S)- & (1S,4R)-4-(4-((3,4-dichlorophenyl)amino)-1H-imidazo[4,5-c]quinolin-2-yl)cycloheptan-1-ol – Compound **33**

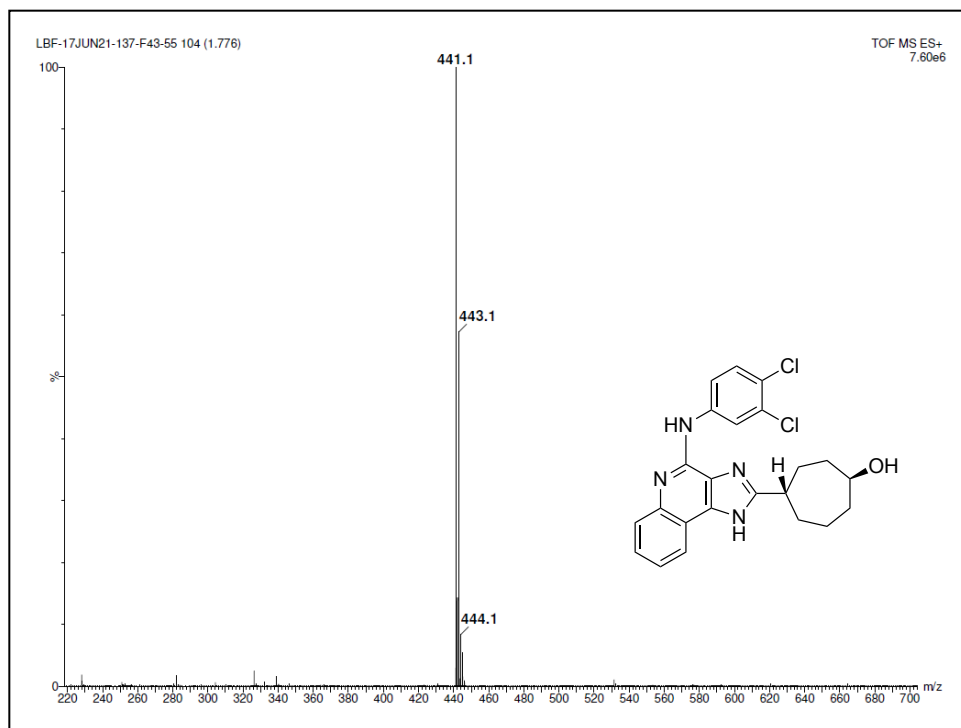

**Elemental Composition Report** Page 1

**Single Mass Analysis**  
Tolerance = 5.0 mDa / DBE: min = -1.5, max = 100.0  
Element prediction: Off  
Number of isotope peaks used for i-FIT = 3

Monoisotopic Mass, Even Electron Ions  
64 formula(e) evaluated with 1 results within limits (up to 50 closest results for each mass)  
Elements Used:  
C: 0-100 H: 0-250 N: 4-4 O: 0-50 35Cl: 2-2  
LBF-17JUN21-137-F43-55 116 (1.979) AM2 (Ar,25000.0,0.00,0.00); ABS  
TOF MS ES+

4.24e+005

100 419.3 420.3 422.9 424.4 424.9 429.2 430.9 432.3 433.4 436.3 438.9 441.1 443.1 444.1 448.3 450.3 452.3 453.3 454.9 456.9

Minimum: -1.5  
Maximum: 100.0

| Mass     | Calc. Mass | mDa | PPM | DBE  | i-FIT | Norm | Conf (%) | Formula            |
|----------|------------|-----|-----|------|-------|------|----------|--------------------|
| 441.1252 | 441.1249   | 0.3 | 0.7 | 13.5 | 430.9 | n/a  | n/a      | C23 H23 N4 O 35Cl2 |

TOF MS ES+ and elemental analysis of (1R,4R)-, & (1S,4S)-4-(4-((3,4-dichlorophenyl)amino)-1H-imidazo[4,5-c]quinolin-2-yl)cycloheptan-1-ol – Compound **34**

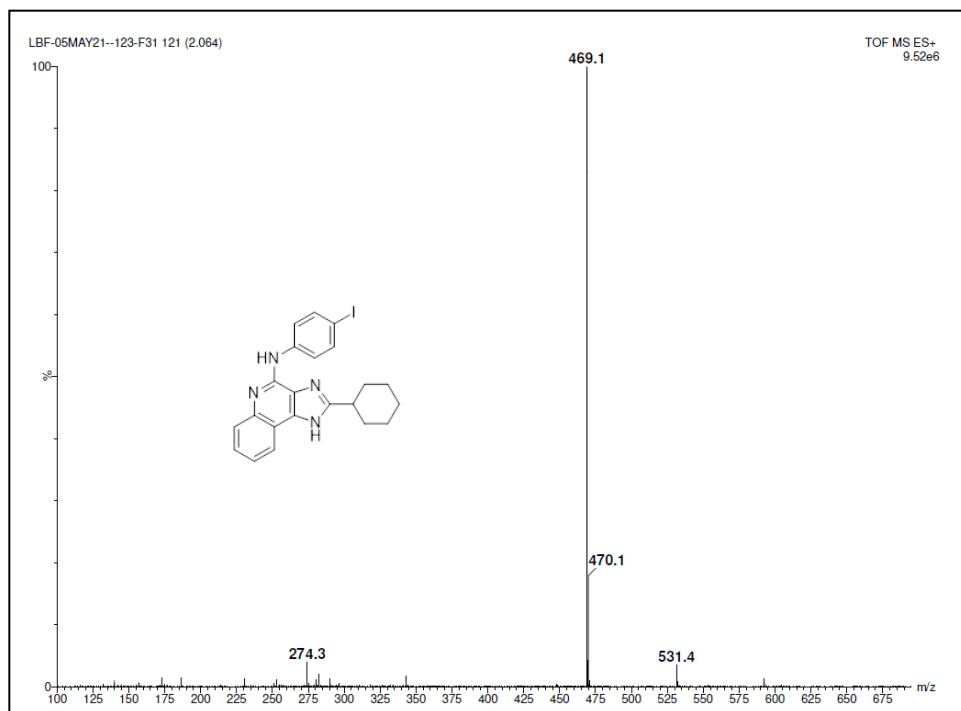

**Elemental Composition Report** Page 1

**Single Mass Analysis**  
 Tolerance = 5.0 mDa / DBE: min = -1.5, max = 100.0  
 Element prediction: Off  
 Number of isotope peaks used for i-FIT = 3

Monoisotopic Mass, Even Electron Ions  
 51 formula(e) evaluated with 2 results within limits (up to 50 closest results for each mass)  
 Elements Used:  
 C: 0-100 H: 0-250 N: 4-4 O: 0-50 I: 1-1

LBF-05MAY21--123-F31 131 (2.233) AM2 (Ar,25000.0,0.00,0.00); ABS; Cm (131:140)  
 TOF MS ES+ 2.18e+006

| Mass     | Calc. Mass | mDa  | PPM   | DBE  | i-FIT | Norm  | Conf(%) | Formula         |
|----------|------------|------|-------|------|-------|-------|---------|-----------------|
| 469.0898 | 469.0889   | 0.9  | 1.9   | 13.5 | 354.4 | 0.434 | 64.76   | C22 H22 N4 I    |
|          | 469.0948   | -5.0 | -10.7 | 4.5  | 355.1 | 1.043 | 35.24   | C15 H26 N4 O5 I |

TOF MS ES+ and elemental analysis of 2-cyclohexyl-*N*-(4-iodophenyl)-1*H*-imidazo[4,5-*c*]quinolin-4-amine – Compound **35**

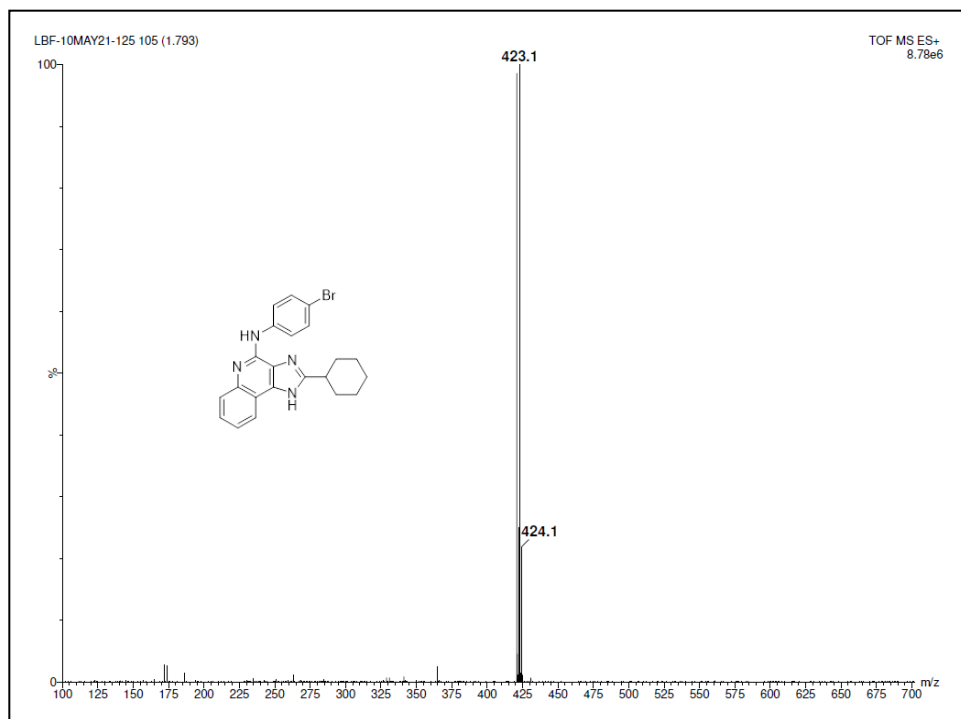

**Elemental Composition Report** Page 1

**Single Mass Analysis**  
Tolerance = 5.0 mDa / DBE: min = -1.5, max = 100.0  
Element prediction: Off  
Number of isotope peaks used for i-FIT = 3

Monoisotopic Mass, Even Electron Ions  
51 formula(e) evaluated with 1 results within limits (up to 50 closest results for each mass)  
Elements Used:  
C: 0-100 H: 0-250 N: 4-4 O: 0-50 79Br: 1-1  
LBF-10MAY21-125 121 (2.064) AM2 (Ar,25000.0,0.00,0.00); ABS  
TOF MS ES+

100 402.9 404.2 406.9 409.0 411.9 413.0 414.8 417.0 419.3 421.1 423.1 424.1 428.3 432.3 433.4 434.2 436.3 438.9 440.9 443.9 444.9 5.35e+005

0 405.0 410.0 415.0 420.0 425.0 430.0 435.0 440.0 445.0

m/z

Minimum: -1.5  
Maximum: 5.0 5.0 100.0

| Mass     | Calc. Mass | mDa | PPM | DBE  | i-FIT | Norm | Conf(%) | Formula         |
|----------|------------|-----|-----|------|-------|------|---------|-----------------|
| 421.1029 | 421.1028   | 0.1 | 0.2 | 13.5 | 418.9 | n/a  | n/a     | C22 H22 N4 79Br |

TOF MS ES+ and elemental analysis of 2-cyclohexyl-*N*-(4-bromophenyl)-1*H*-imidazo[4,5-*c*]quinolin-4-amine – Compound **36**

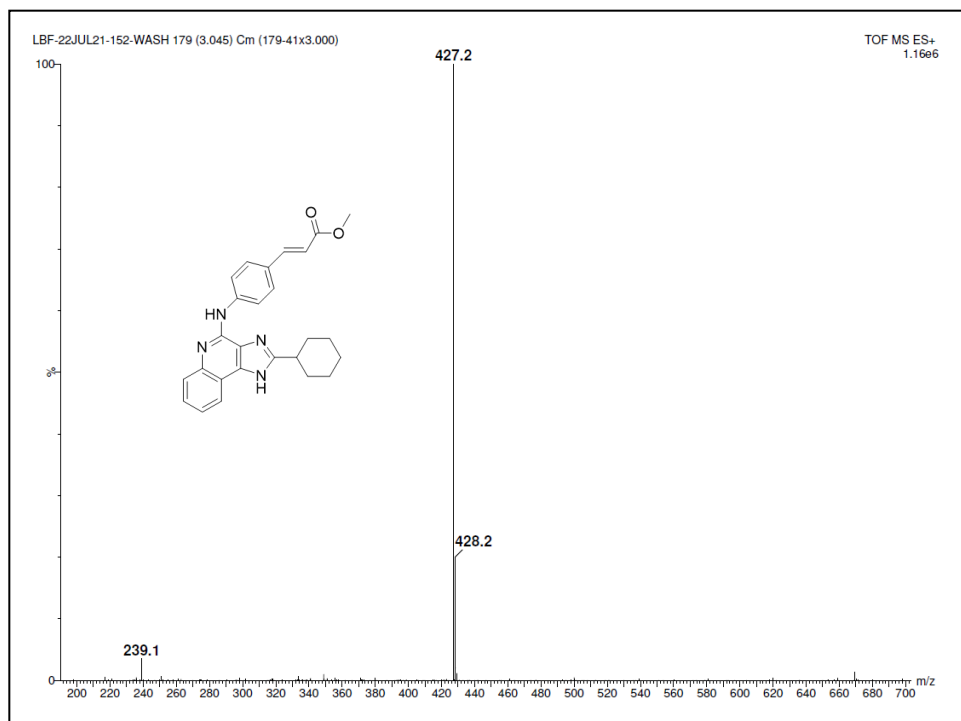

**Elemental Composition Report** Page 1

**Single Mass Analysis**  
Tolerance = 5.0 mDa / DBE: min = -1.5, max = 100.0  
Element prediction: Off  
Number of isotope peaks used for i-FIT = 3

Monoisotopic Mass, Even Electron Ions  
82 formula(e) evaluated with 1 results within limits (up to 50 closest results for each mass)  
Elements Used:  
C: 0-100 H: 0-250 N: 4-4 O: 0-20  
LBF-22JUL21-152-WASH 176 (2.994) AM2 (Ar,25000.0,0.00,0.00); ABS  
TOF MS ES+

9.84e+006

Mass spectrum peaks (m/z): 411.2, 413.3, 415.2, 416.3, 418.3, 420.3, 421.0, 423.1, 424.3, 427.2, 428.2, 429.2, 430.9, 432.3, 434.3, 436.3, 436.9, 439.0, 441.0, 441.9

| Mass     | Calc. Mass | mDa  | PPM  | DBE  | 1-FIT | Norm | Conf(%) | Formula       |
|----------|------------|------|------|------|-------|------|---------|---------------|
| 427.2133 | 427.2134   | -0.1 | -0.2 | 15.5 | 492.6 | n/a  | n/a     | C26 H27 N4 O2 |

TOF MS ES+ and elemental analysis of methyl (E)- & (Z)-3-(4-((2-cyclohexyl-1H-imidazo[4,5-c]quinolin-4-yl)amino)phenyl)acrylate – Compound **37**

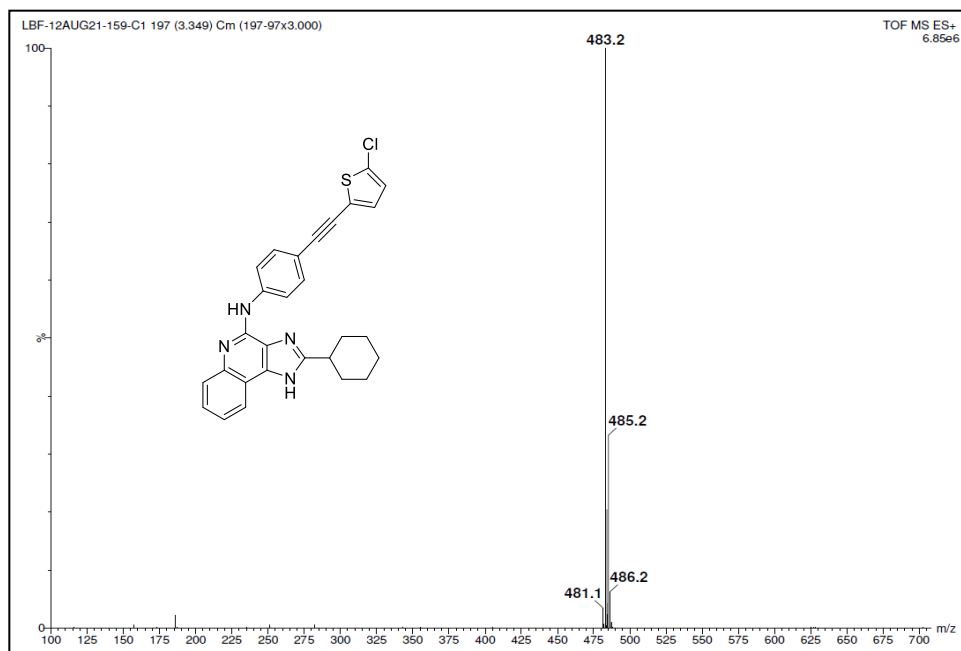

## Elemental Composition Report

Page 1

## Single Mass Analysis

Tolerance = 5.0 mDa / DBE: min = -1.5, max = 100.0

Element prediction: Off

Number of isotope peaks used for i-FIT = 3

Monoisotopic Mass, Even Electron Ions

76 formula(e) evaluated with 1 results within limits (up to 50 closest results for each mass)

Elements Used:

C: 0-100 H: 0-250 N: 4-4 O: 0-20 32S: 1-1 35Cl: 1-1

LBF-12AUG21-159-C1 193 (3.281)AM2 (Ar,25000.0,0.00,0.00); ABS

TOF MS ES+

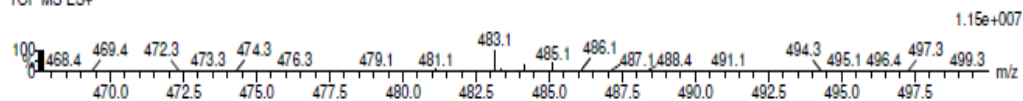

Minimum: -1.5  
Maximum: 5.0 5.0 100.0

| Mass     | Calc. Mass | mDa | PPM | DBE  | 1-FIT | Norm | Conf(%) | Formula             |
|----------|------------|-----|-----|------|-------|------|---------|---------------------|
| 483.1412 | 483.1410   | 0.2 | 0.4 | 18.5 | 516.3 | n/a  | n/a     | C28 H24 N4 32S 35Cl |

TOF MS ES+ and elemental analysis of 2-cyclohexyl-*N*-(4-((5-chlorothiophen-2-yl)ethynyl)phenyl)-1*H*-imidazo[4,5-*c*]quinolin-4-amine – Compound **38**

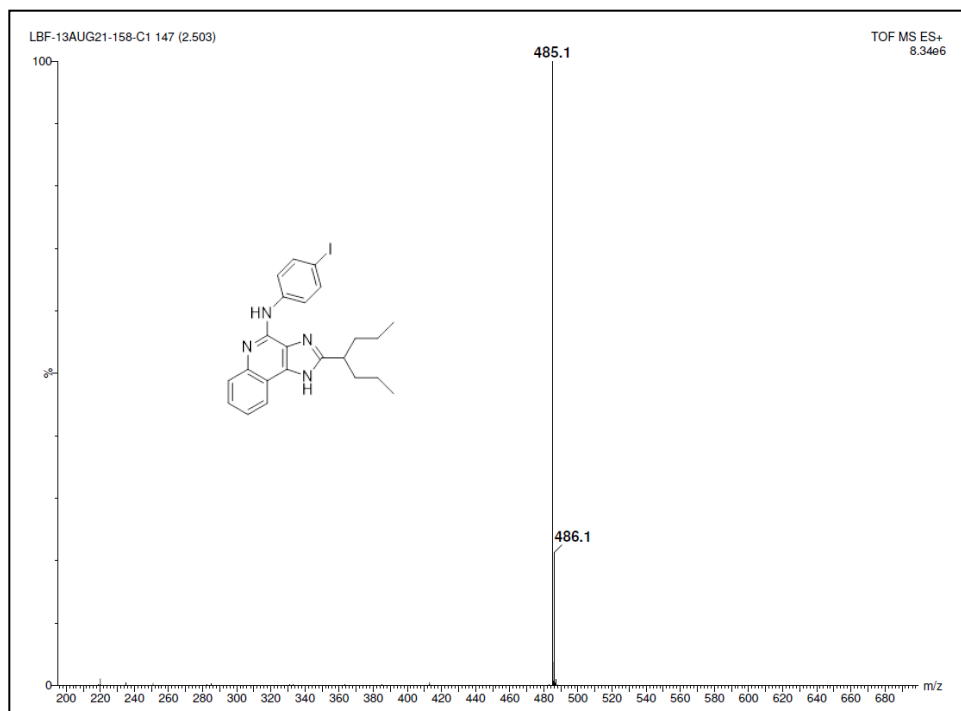

**Elemental Composition Report** Page 1

**Single Mass Analysis**  
Tolerance = 5.0 mDa / DBE: min = -1.5, max = 100.0  
Element prediction: Off  
Number of isotope peaks used for i-FIT = 3

Monoisotopic Mass, Even Electron Ions  
56 formula(e) evaluated with 1 results within limits (up to 50 closest results for each mass)  
Elements Used:  
C: 0-100 H: 0-250 N: 4-4 O: 0-20 I: 1-1  
LBF-13AUG21-158-C1 151 (2.571) AM2 (Ar,25000.0,0.00,0.00); ABS  
TOF MS ES+

100 464.3 466.4 468.4 469.4 474.3 476.3 478.3 480.3 482.4 485.1 486.1 490.3 492.5 496.4 497.4 500.9 501.9 506.3 508.3 510.4 512.4 513.4 1.84e+005

465.0 470.0 475.0 480.0 485.0 490.0 495.0 500.0 505.0 510.0 515.0 m/z

Minimum: -1.5  
Maximum: 5.0 5.0 100.0

| Mass     | Calc. Mass | mDa  | PPM  | DBE  | i-FIT | Norm | Conf(%) | Formula      |
|----------|------------|------|------|------|-------|------|---------|--------------|
| 485.1200 | 485.1202   | -0.2 | -0.4 | 12.5 | 329.6 | n/a  | n/a     | C23 H26 N4 I |

TOF MS ES+ and elemental analysis of 2-(heptan-4-yl)-N-(4-iodophenyl)-1H-imidazo[4,5-c]quinolin-4-amine – Compound **39**

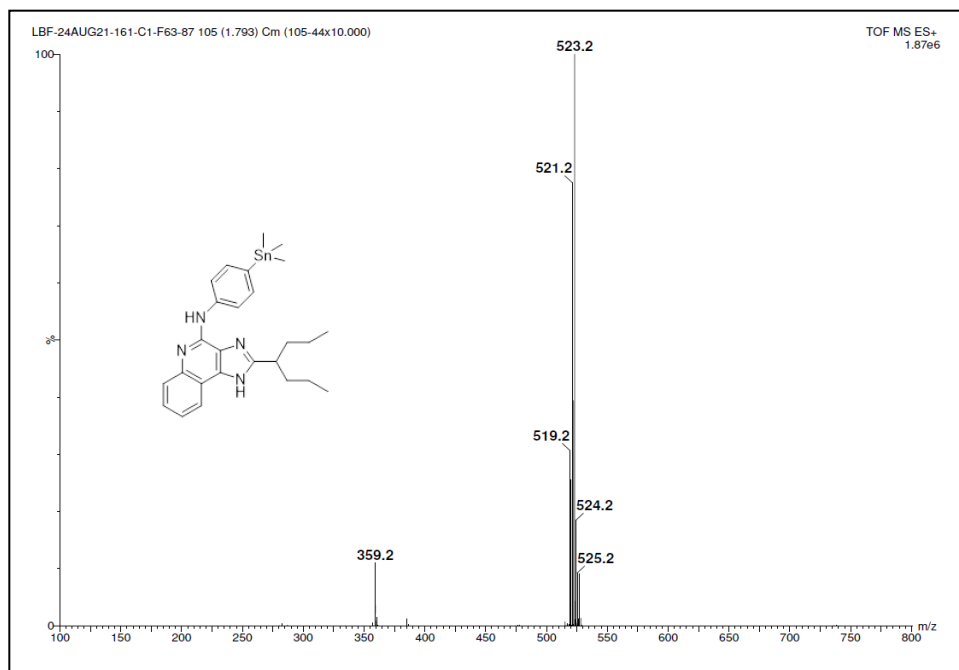

**Elemental Composition Report** Page 1

**Single Mass Analysis**  
Tolerance = 5.0 mDa / DBE: min = -1.5, max = 100.0  
Element prediction: Off  
Number of isotope peaks used for i-FIT = 3

Monoisotopic Mass, Even Electron Ions  
149 formula(e) evaluated with 3 results within limits (up to 50 closest results for each mass)  
Elements Used:  
C: 0-100 H: 0-250 N: 4-4 O: 0-20 Na: 0-1 120Sn: 1-1

LBF-24AUG21-161-C1-F63-87 101 (1.725) AM2 (Ar,25000.0,0.00,0.00); ABS  
TOF MS ES+ 3.76e+006

Mass spectrum peaks (m/z): 498.1, 499.3, 501.4, 502.4, 505.3, 506.3, 509.1, 512.4, 513.1, 515.2, 517.2, 519.2, 521.2, 523.2, 524.2, 527.2, 528.2, 531.4, 533.3, 535.2, 536.4, 539.3, 541.3, 542.1

| Mass     | Calc. Mass | Mass mDa | PPM  | DBE  | 1-FIT | Norm  | Conf(%) | Formula                |
|----------|------------|----------|------|------|-------|-------|---------|------------------------|
| 523.1882 | 523.1884   | -0.2     | -0.4 | 12.5 | 498.6 | 1.117 | 32.72   | C26 H35 N4 120Sn       |
|          | 523.1860   | 2.2      | 4.2  | 9.5  | 498.6 | 1.140 | 31.98   | C24 H36 N4 Na 120Sn    |
|          | 523.1918   | -3.6     | -6.9 | 0.5  | 498.5 | 1.041 | 35.30   | C17 H40 N4 O5 Na 120Sn |

TOF MS ES+ and elemental analysis of 2-(heptan-4-yl)-N-(4-(trimethylstannyl)phenyl)-1H-imidazo[4,5-c]quinolin-4-amine – Compound **48**



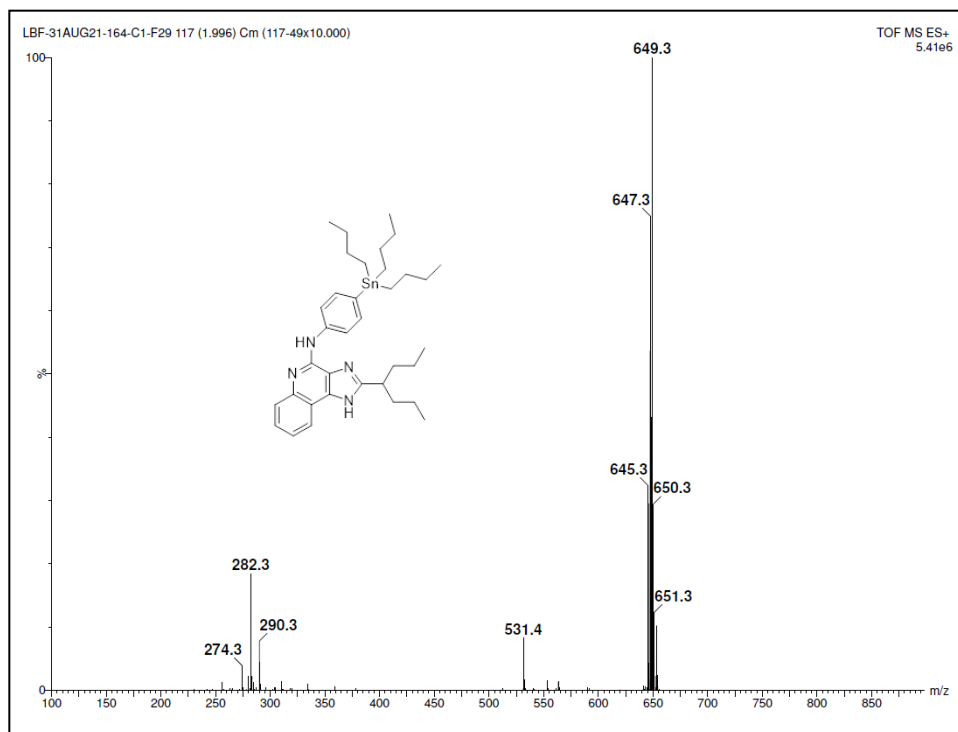

**Elemental Composition Report** Page 1

**Single Mass Analysis**  
Tolerance = 5.0 mDa / DBE: min = -1.5, max = 100.0  
Element prediction: Off  
Number of isotope peaks used for i-FIT = 3

Monoisotopic Mass, Even Electron Ions  
107 formula(e) evaluated with 1 results within limits (up to 50 closest results for each mass)  
Elements Used:  
C: 0-100 H: 0-250 N: 4-4 O: 0-20 120Sn: 1-1  
LBF-31AUG21-164-C1-F29 111 (1.894)AM2 (Ar,25000.0.0.00.0.00); ABS  
TOF MS ES+

Minimum: 5.0 5.0 -1.5  
Maximum: 5.0 5.0 100.0

| Mass     | Calc. Mass | mDa | PPM | DBE  | i-FIT | Norm | Conf(%) | Formula          |
|----------|------------|-----|-----|------|-------|------|---------|------------------|
| 649.3293 | 649.3292   | 0.1 | 0.2 | 12.5 | 420.8 | n/a  | n/a     | C35 H53 N4 120Sn |

TOF MS ES+ and elemental analysis of 2-(heptan-4-yl)-*N*-(4-(tributylstannyl)phenyl)-1*H*-imidazo[4,5-*c*]quinolin-4-amine – Compound **49**

**13 – HPLC Purity 97% ( $R_t = 14.9$  min)**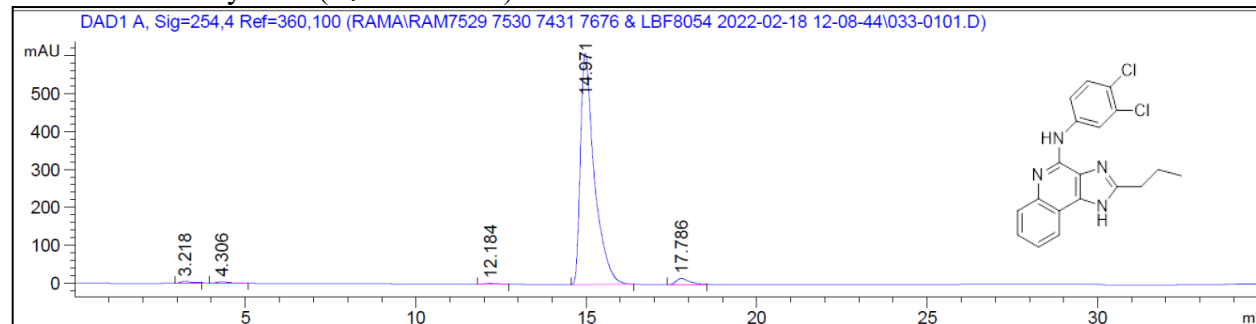**14 – HPLC Purity 97% ( $R_t = 19.7$  min)**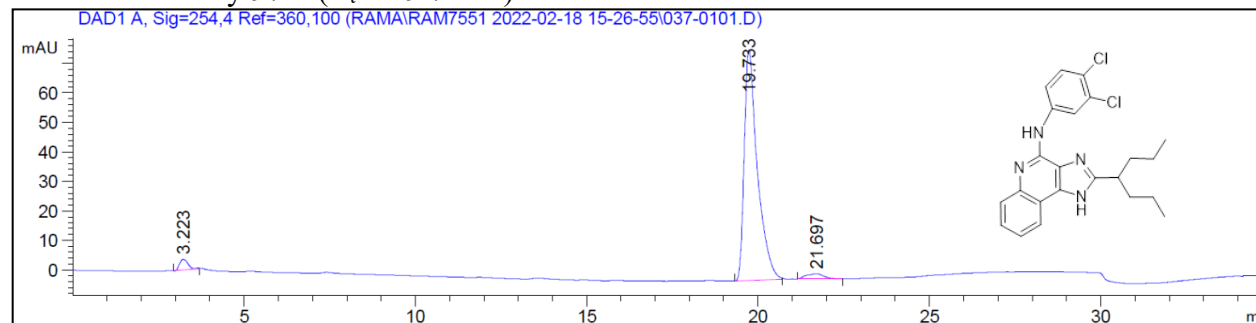**15 – HPLC Purity 91% ( $R_t = 18.1$  min)**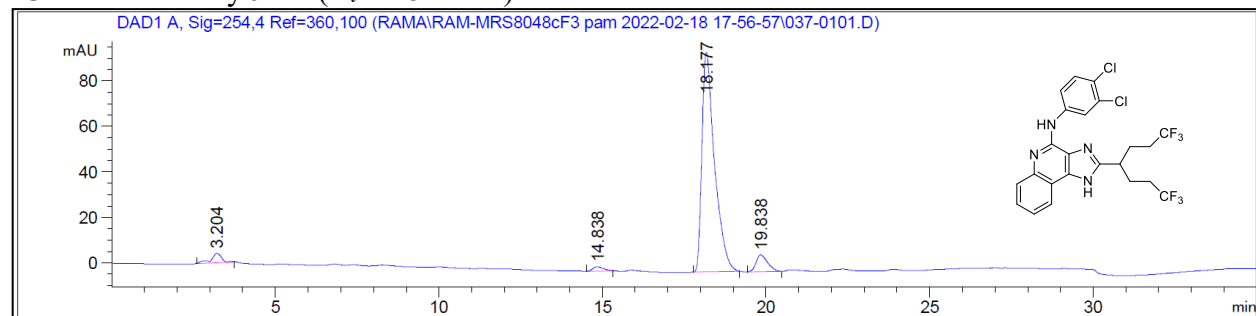

**16 – HPLC Purity 99% ( $R_t = 18.2$  min)**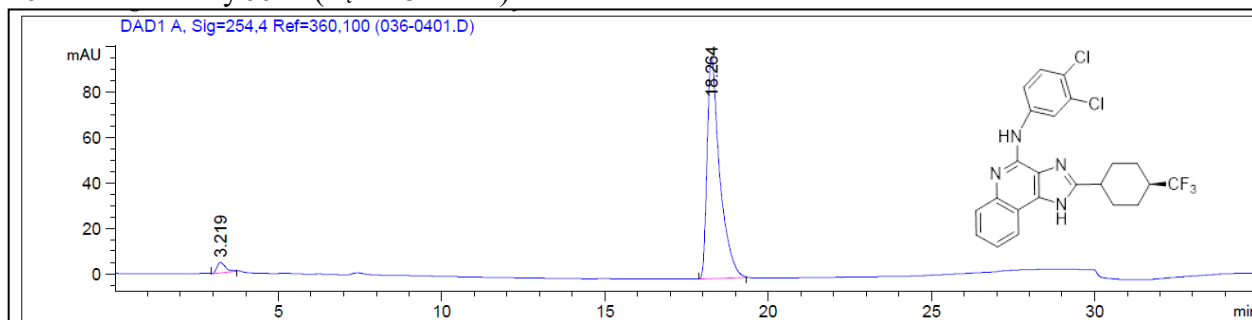**17 – HPLC Purity 99% ( $R_t = 14.4$  min)**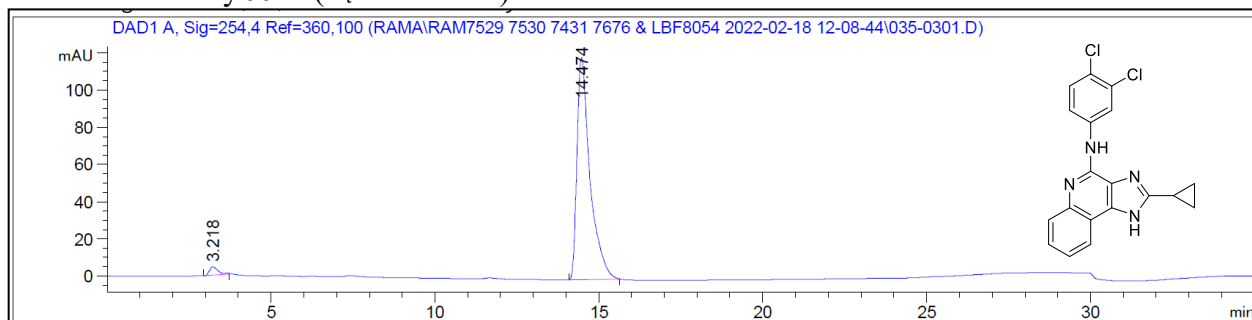**18 – HPLC Purity 99% ( $R_t = 18.4$  min)**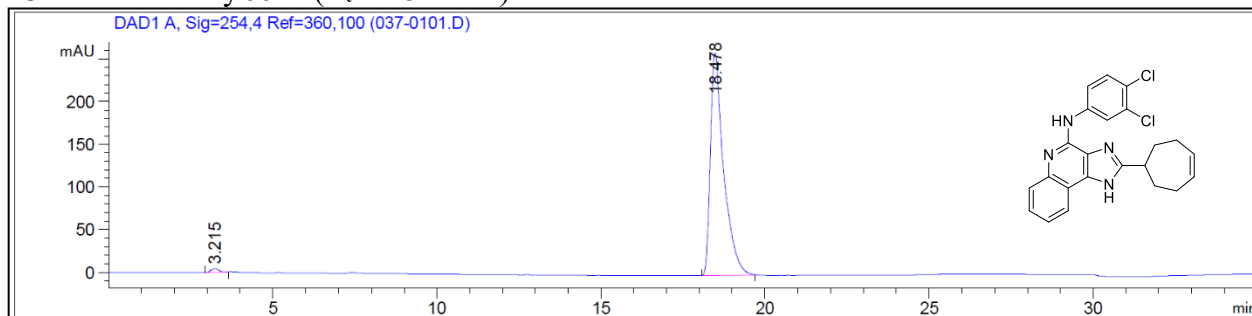**19 – HPLC Purity 98% ( $R_t = 20.5$  min)**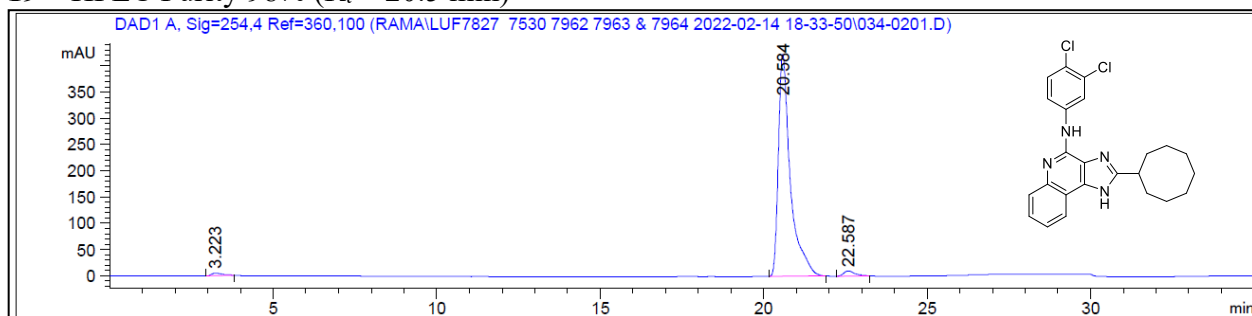

**20 – HPLC Purity 99% ( $R_t = 21.7$  min)**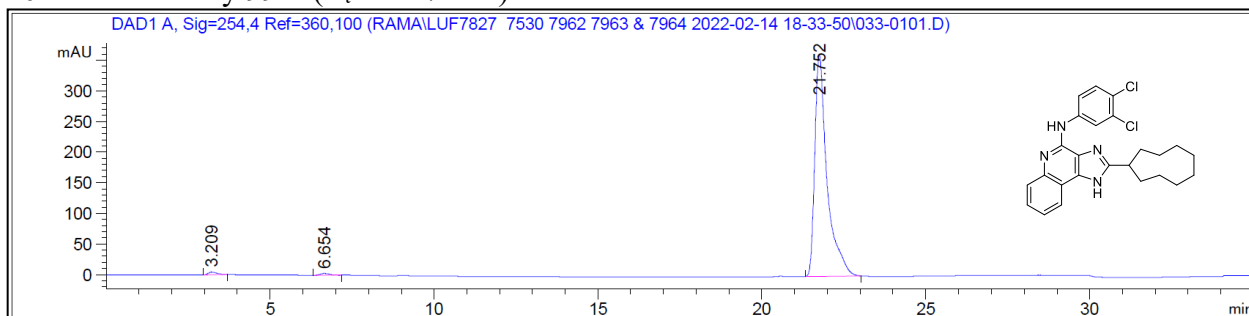**21 – HPLC Purity 77% ( $R_t = 23.8$  min)**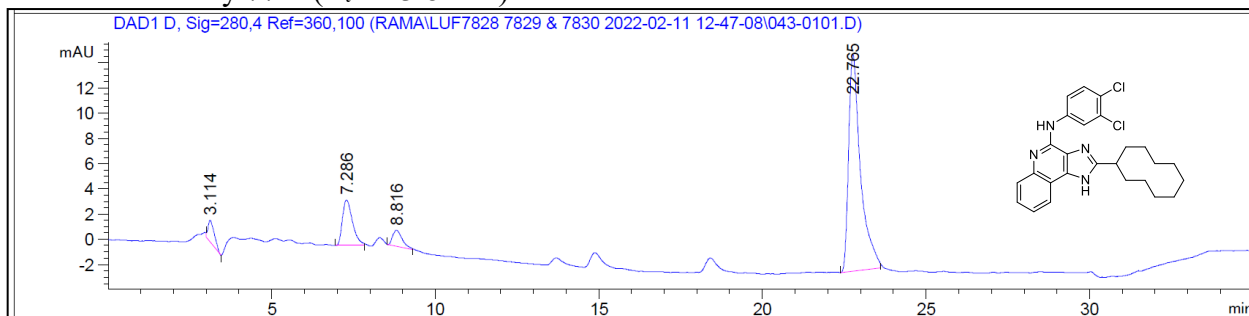**22 – HPLC Purity 80% ( $R_t = 22.7$  min)**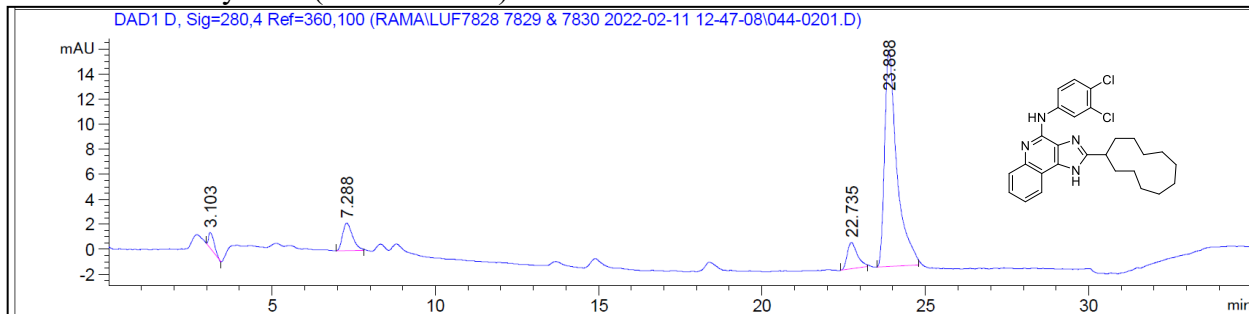**23 – HPLC Purity 95% ( $R_t = 21.6$  min)**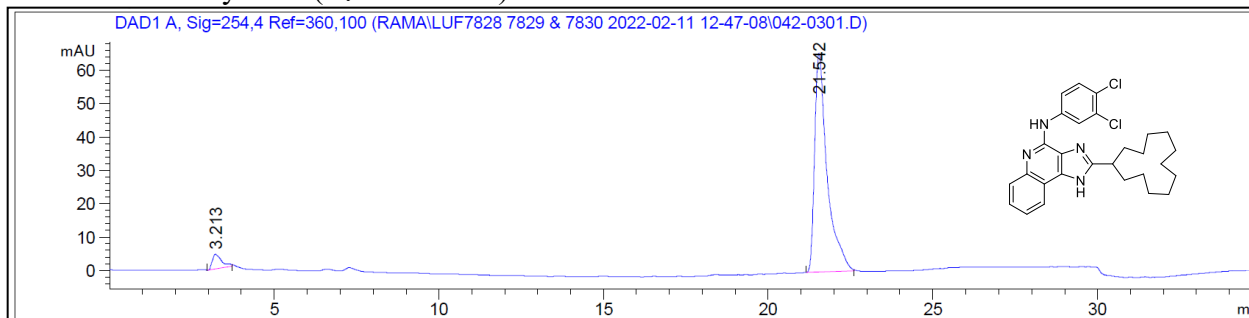

**24 – HPLC Purity 99% ( $R_t = 16.1$  min)**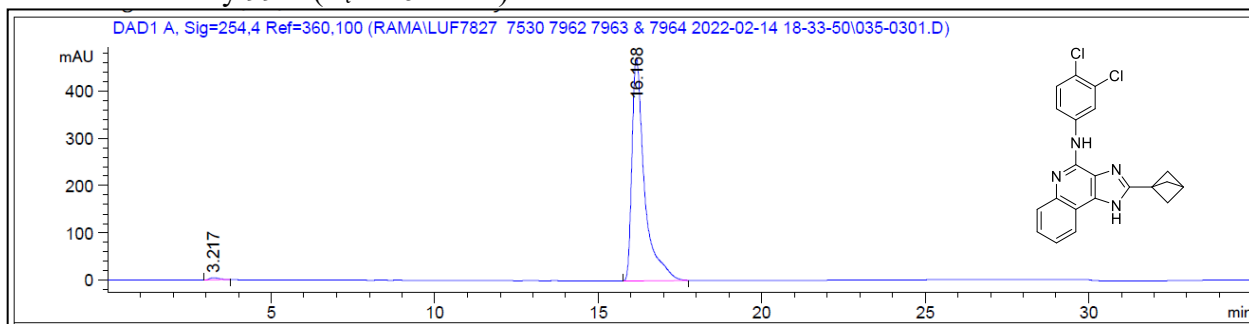**25 – HPLC Purity 96% ( $R_t = 18.3$  min)**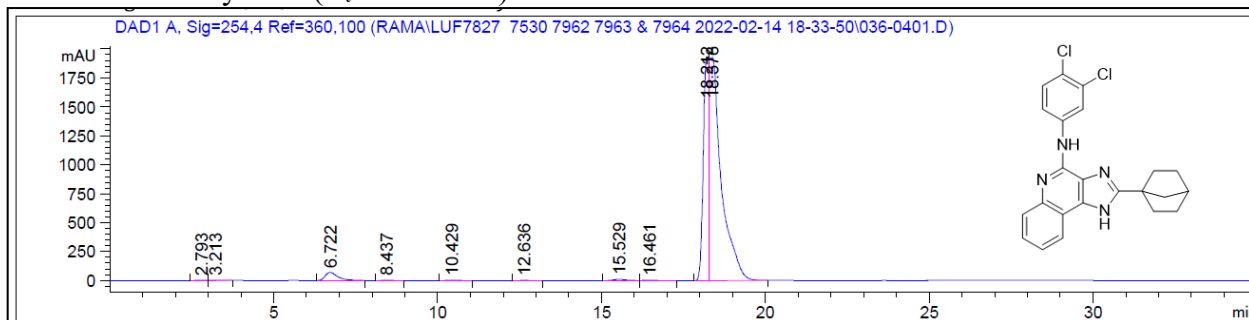**26 – HPLC Purity 95% ( $R_t = 21.0$  min)**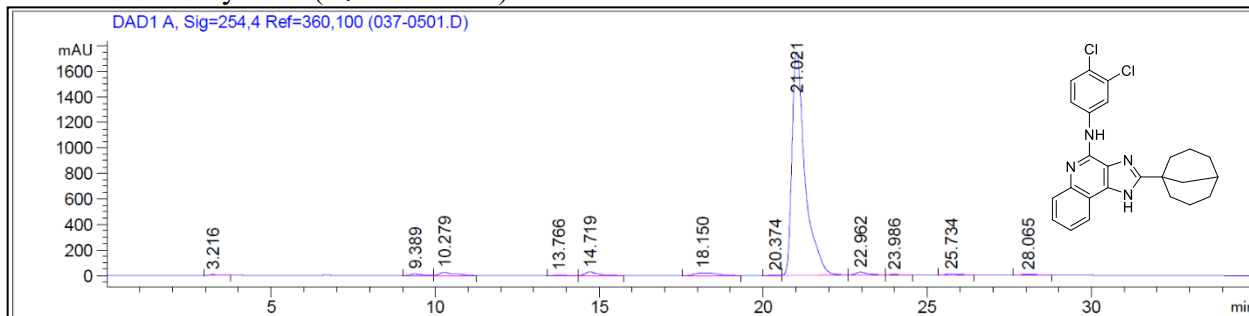**27 – HPLC Purity 98% ( $R_t = 19.4$  min)**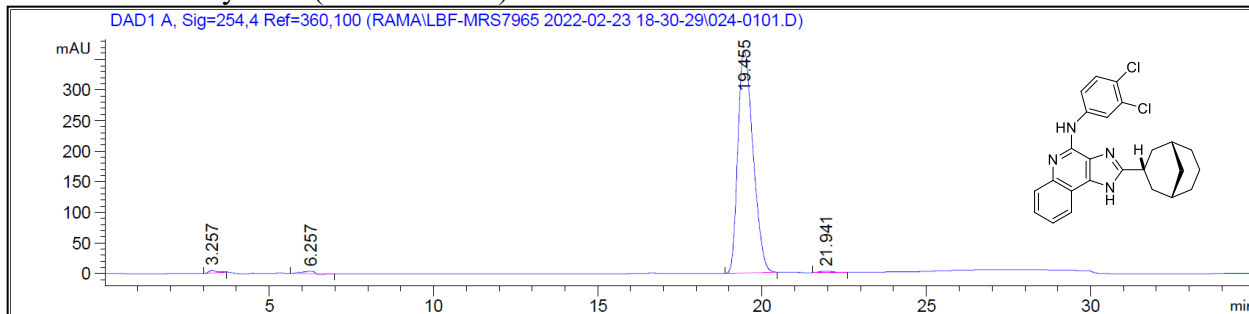

**28** – HPLC Purity 95% ( $R_t = 19.0$  min)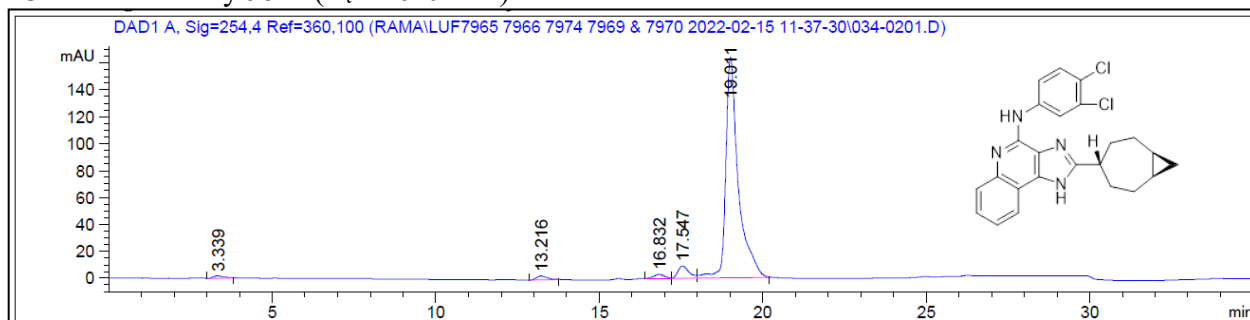**29** – HPLC Purity 99% ( $R_t = 17.9$  min)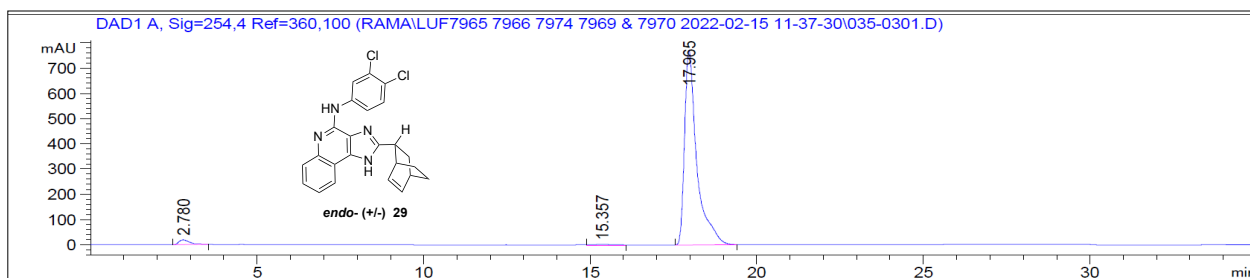**30** – HPLC Purity 96% ( $R_t = 14.1$  min)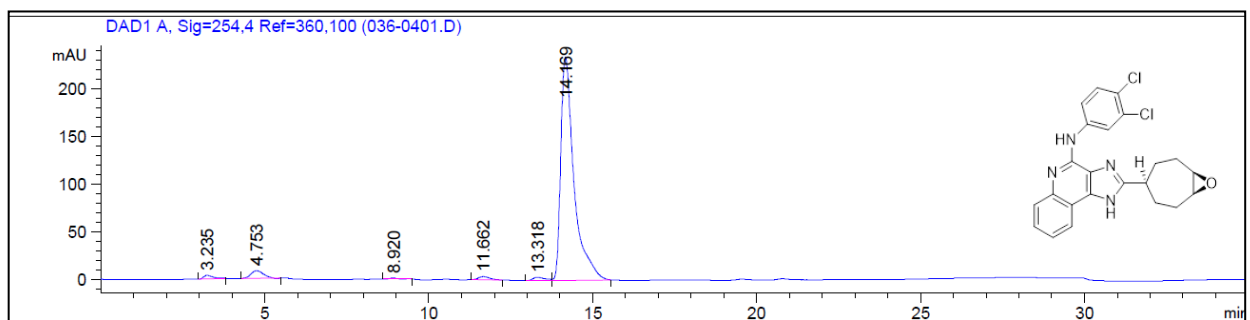**31** – HPLC Purity 99% ( $R_t = 14.3$  min)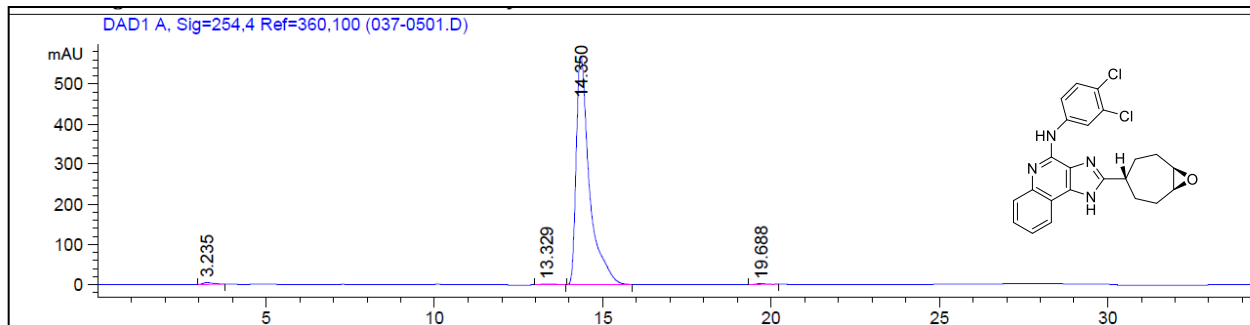

**32 – HPLC Purity 95% ( $R_t = 13.2$  min)**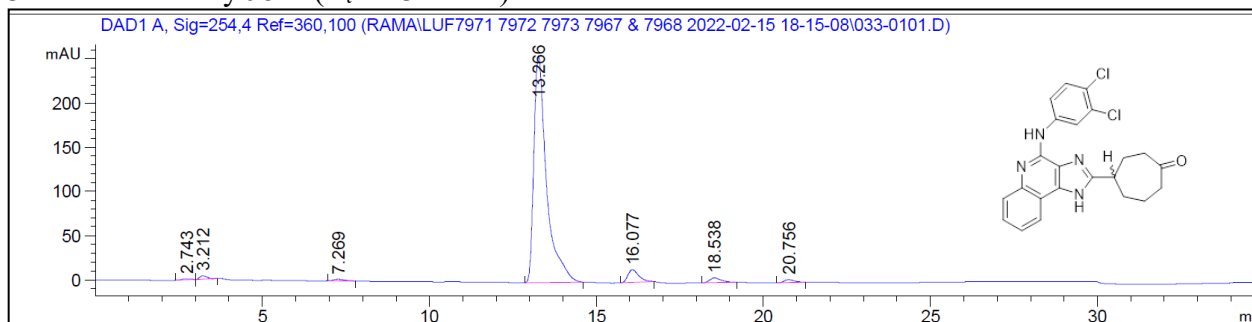**33 – HPLC Purity 95% ( $R_t = 12.2$  min)**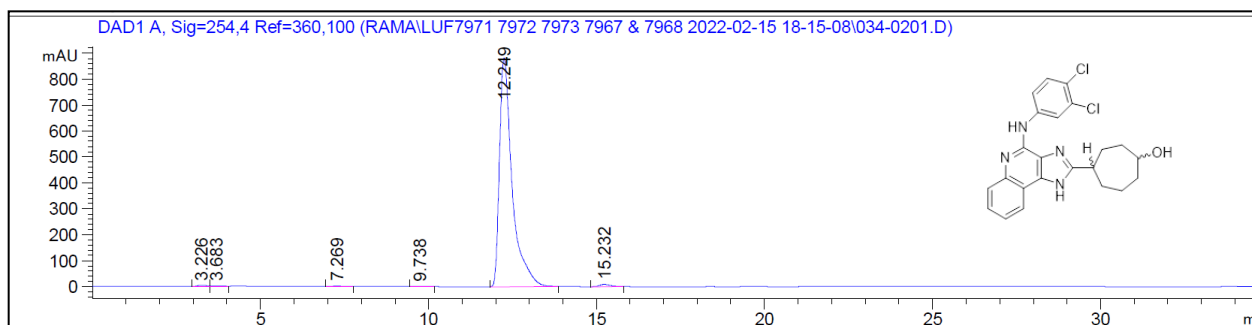**34 – HPLC Purity 98% ( $R_t = 12.4$  min)**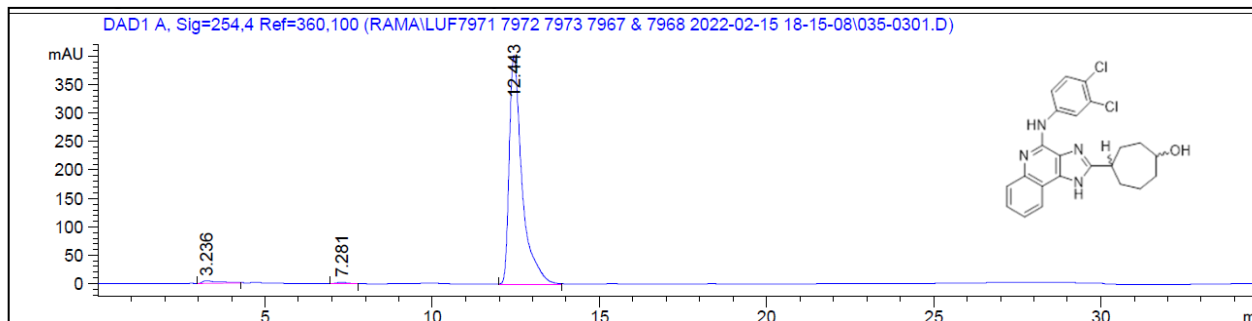**35 – HPLC Purity 96% ( $R_t = 16.7$  min)**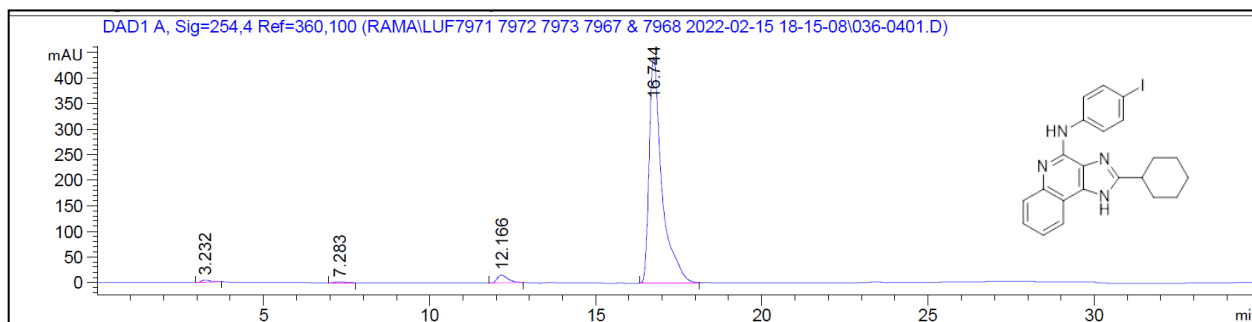

**36 – HPLC Purity 98% ( $R_t = 15.7$  min)**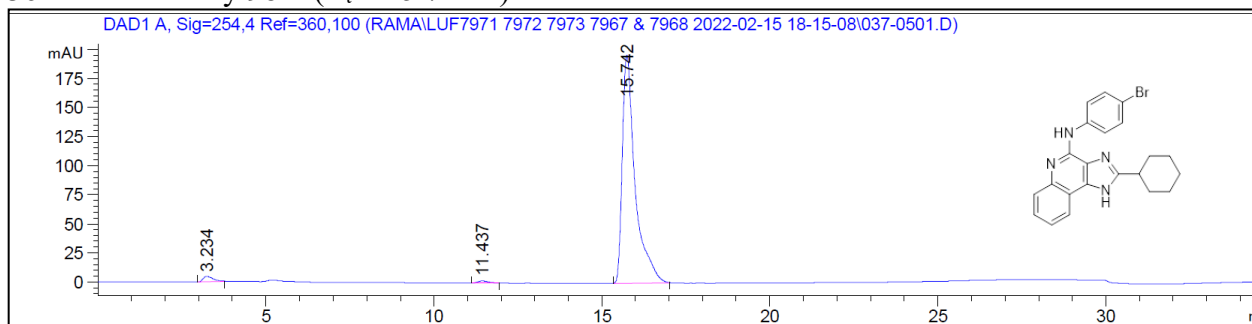**37 – HPLC Purity 98% ( $R_t = 13.1$  min)**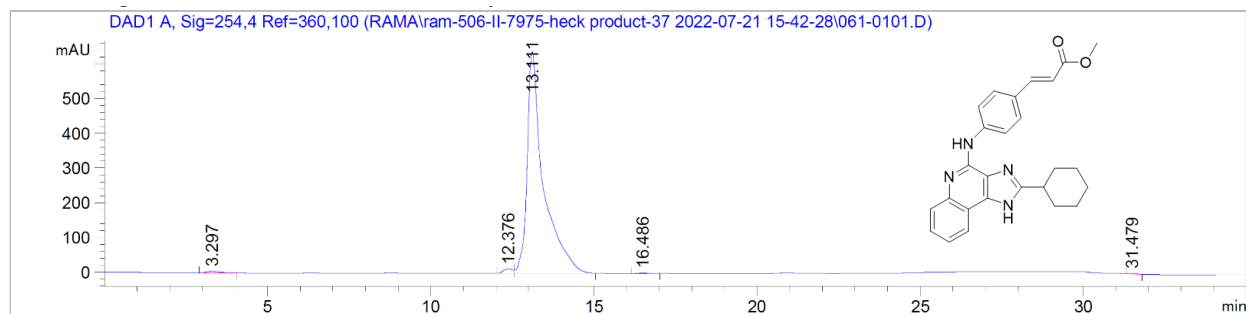**38 – HPLC Purity 96% ( $R_t = 16.3$  min)**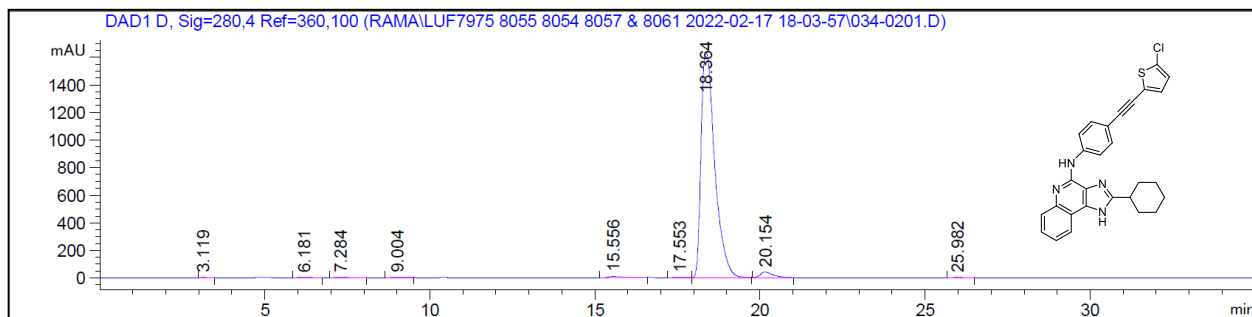**39 – HPLC Purity 97% ( $R_t = 18.6$  min)**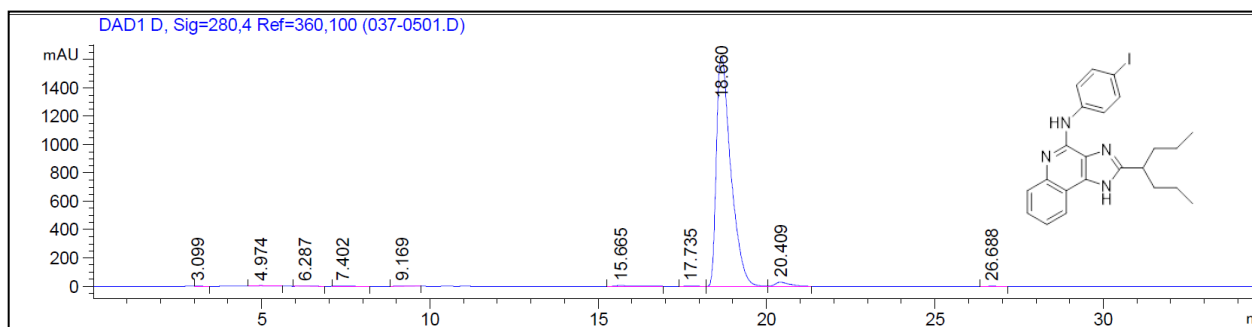



**48** – HPLC Purity 86% ( $R_t = 13.9$  min)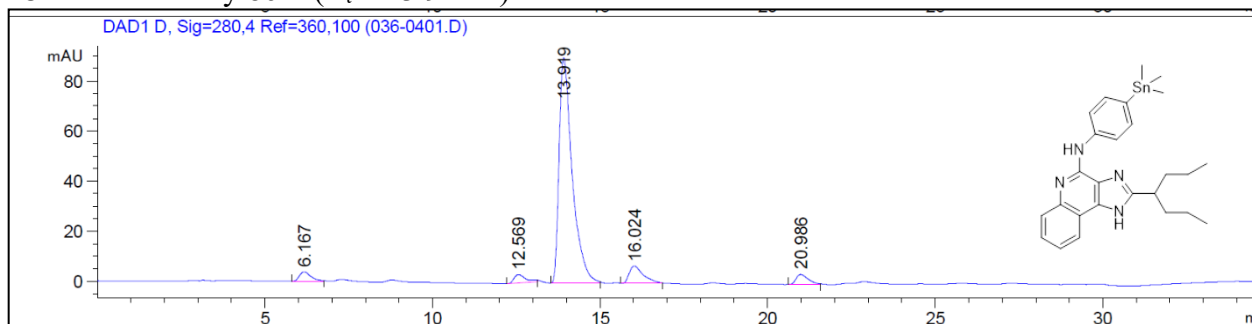**49** – HPLC Purity 95% ( $R_t = 13.9$  min)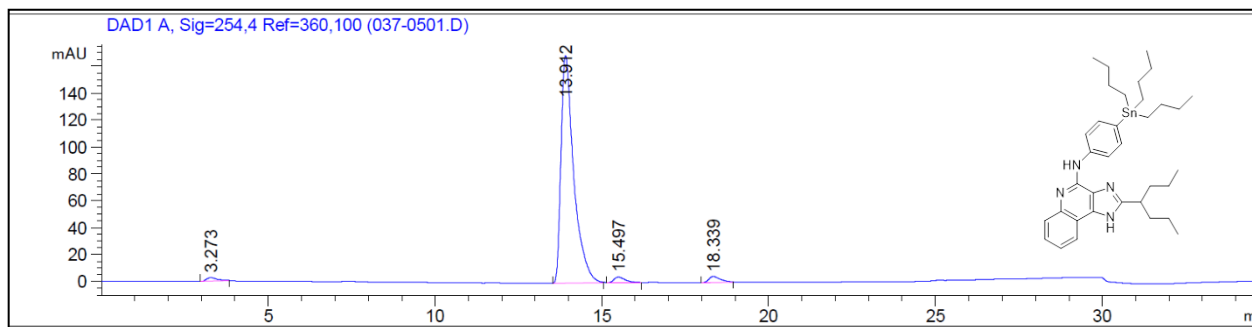

**Figure S1A,B.** Determination of the affinity of compounds **7** (A) and **17** (B) at the orthosteric site, using Schild analysis of shifts in the Cl-IB-MECA activation curves ( $[^{35}\text{S}]\text{GTP}\gamma\text{S}$  binding) of the chimeric human-out/mouse-in  $\text{A}_3\text{AR}$  construct (data from Fisher et al., 2022).<sup>3</sup>

A) X-intercept = 6.0976, corresponds to  $K_B = 799$  nM

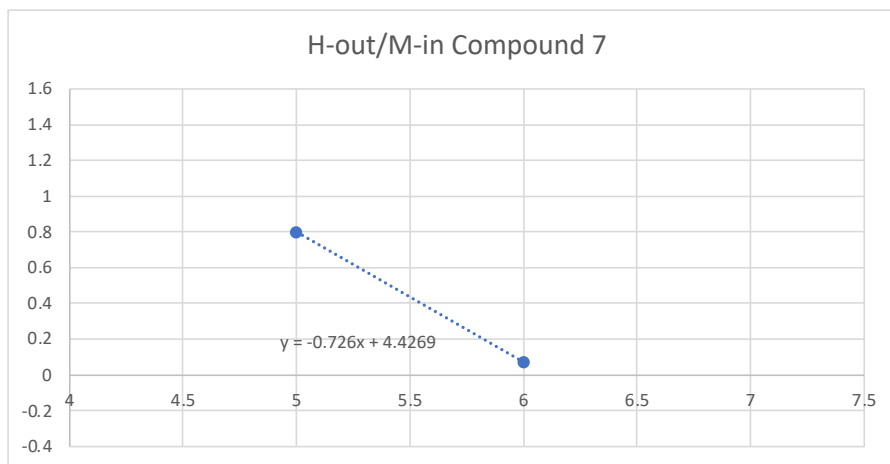

B) X-intercept = 6.853, corresponds to  $K_B = 140$  nM

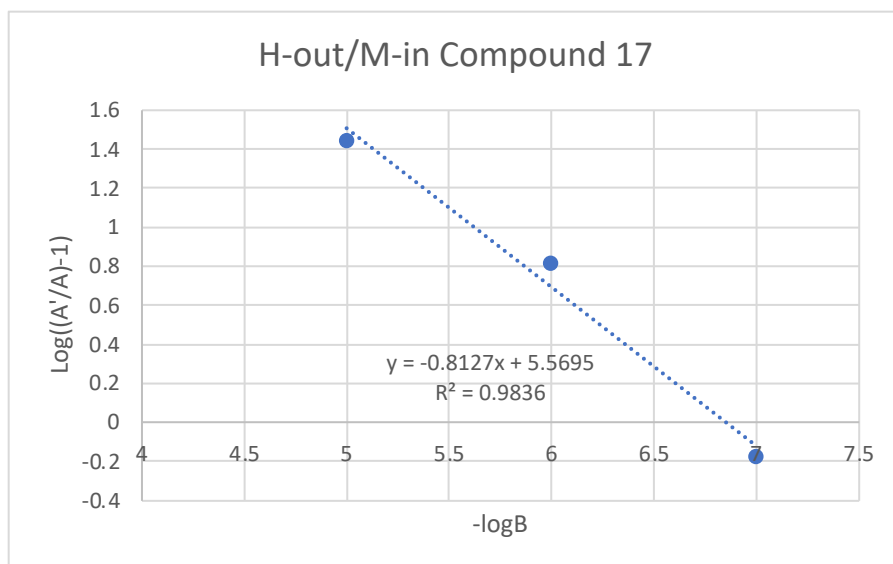

Determination of the affinity of compounds **7**, **14** and **17** at the WT hAR orthosteric sites.

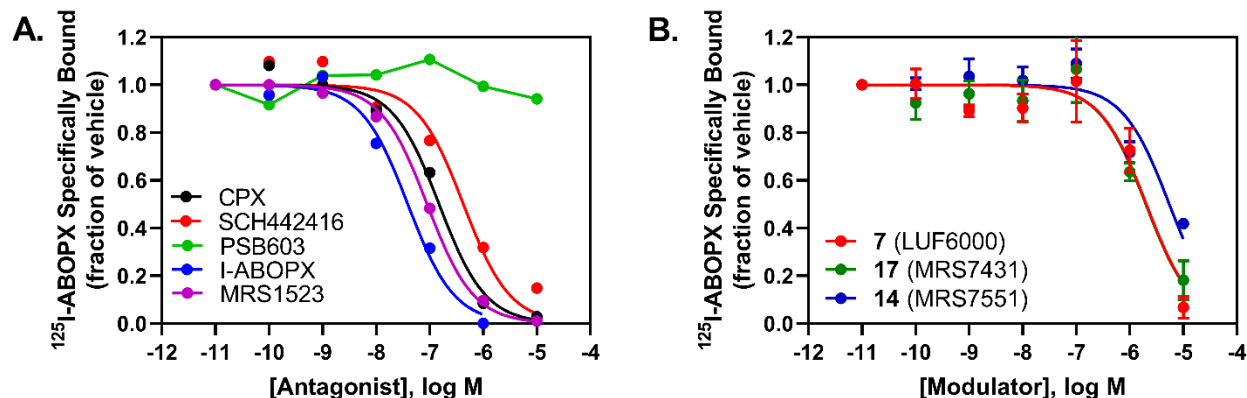

**Figure S2.** Effects of compounds **7**, **14** and **17** in equilibrium binding assays with the antagonist radioligand  $^{125}\text{I-ABOPX}$  (conc. 0.4 nM,  $K_d$  17.3±1.2 nM) and the WT hA<sub>3</sub>AR. **Panel A** confirms specificity of  $^{125}\text{I-ABOPX}$  for the hA<sub>3</sub>AR based on the antagonist potency order of: I-ABOPX (38) > MRS1523 (89) > DPCPX (149) > SCH442416 (424) >> PSB603, with  $K_i$  values (nM, N=1) in parentheses. Propyl 6-ethyl-5-((ethylthio)carbonyl)-2-phenyl-4-propylnicotinate (MRS1523) is a selective A<sub>3</sub>AR-selective antagonist. **Panel B** shows displacement of  $^{125}\text{I-ABOPX}$  specific binding by compounds **7**, **14**, and **17**.

Synthesis of [ $^{125}\text{I}$ ]2-(4-(3-(4-amino-3-iodobenzyl)-2,6-dioxo-1-propyl-2,3,6,7-tetrahydro-1*H*-purin-8-yl)phenoxy)acetic acid ( $^{125}\text{I-ABOPX}$ ) was as described in Linden et al.<sup>5,6</sup> Binding assays were conducted with membranes (75 µg/assay tube) prepared from HEK293 cells transfected with the WT hA<sub>3</sub>AR in 10 mM Tris buffer (pH 7.4) containing 10 mM Mg<sup>2+</sup> in the presence of 0.4 nM  $^{125}\text{I-ABOPX}$  and 50 nM PSB603 to block binding to A<sub>2B</sub>ARs expressed endogenously in HEK293 cells. The  $K_i$  values of known AR antagonist ligands were consistent with binding to the A<sub>3</sub>AR and in agreement with reported values (DPCPX 261 nM; I-ABOPX, 25.5 nM; and XAC, 23.4 nM).<sup>7</sup>

Affinity measured at non-A<sub>3</sub> hARs:

% inhibition of specific binding by 14 at 10 µM:

A<sub>1</sub> – [ $^3\text{H}$ ]DPCPX (8-cyclopentyl-1,3-dipropylxanthine, 0.5 nM) 7.85±4.75%

A<sub>2A</sub> – [ $^3\text{H}$ ]ZM241385 (4-[2-[7-amino-2-(2-furyl)-1,2,4-triazolo[1,5-a][1,3,5]triazin-5-yl-amino]ethyl]phenol, 1.0 nM) 6.67±2.96%

A<sub>2B</sub> – [ $^3\text{H}$ ]DPCPX (10 nM) 0.67±3.63%

## Molecular Modeling

```

aa1r_human  - - - MPPS I S A F Q A A Y I G I E V L I A L V S V P G N V L V I W A V K V N Q A L R D A T F C F I V S L A V A D V A
aa3r_human  M P N N S T A L S L A N V T Y I T M E I F I G L C A I V G N V L V I C V V K L N P S L Q T T T F Y F I V S L A L A D I A
consensus   * * * * * * * * * * * * * * * * * * * * * * * * * * * * * * * * * * * * * * * * * * * * * * * * * * * * *
1 . . . . . 1 0 . . . . . 2 0 . . . . . 3 0 . . . . . 4 0 . . . . . 5 0 . . . . .

aa1r_human  V G A L V I P L A I L I N I G P Q T Y F H T C L M V A C P V L I L T Q S S I L A L L A I A V D R Y L R V K I P L R Y K M
aa3r_human  V G V L V M P L A I V V S L G I T I H F Y S C L F M T C L L L I F T H A S I M S L L A I A V D R Y L R V K L T V R Y K R
consensus   * * * * * * * * * * * * * * * * * * * * * * * * * * * * * * * * * * * * * * * * * * * * * * * * * * * * *
6 1 . . . . . 7 0 . . . . . 8 0 . . . . . 9 0 . . . . . 1 0 0 . . . . . 1 1 0 . . . . .

aa1r_human  V V T P R R A A V A I A G C W I L S F V V G L T P M F G W N N L S A V E R A W A A N G S M G E P V I K C E F E K V I S M
aa3r_human  V T T H R R I W L A L G L C W L V S F L V G L T P M F G W N M K L T S E Y H R N V T F L S - - - - - C Q F V S V M R M
consensus   * * * * * * * * * * * * * * * * * * * * * * * * * * * * * * * * * * * * * * * * * * * * * * * * * * * * *
1 2 1 . . . . . 1 3 0 . . . . . 1 4 0 . . . . . 1 5 0 . . . . . 1 6 0 . . . . . 1 7 0 . . . . .

aa1r_human  E Y M V Y F N F F V W V L P P L L L M V L I Y L E V F Y L I R K Q L N K K V S A S S G D P Q K Y Y G K E L K I A K S L A
aa3r_human  D Y M V Y F S F L T W I F I P L V M C A I Y L D I F Y I I R N K L S L N L S N - S K E T G A F Y G R E F K T A K S L F
consensus   * * * * * * * * * * * * * * * * * * * * * * * * * * * * * * * * * * * * * * * * * * * * * * * * * * * * *
1 8 1 . . . . . 1 9 0 . . . . . 2 0 0 . . . . . 2 1 0 . . . . . 2 2 0 . . . . . 2 3 0 . . . . .

aa1r_human  L I L F L F A L S W L P L H I L N C I T L F C P S C H K P S I L T Y I A I F L T H G N S A M N P I V Y A F R I Q K F R V
aa3r_human  L V L F L F A L S W L P L S I I N C I I Y F N G E - V P - Q L V L Y M G I L L S H A N S M M N P I V Y A Y K I K K F K E
consensus   * * * * * * * * * * * * * * * * * * * * * * * * * * * * * * * * * * * * * * * * * * * * * * * * * * * * *
2 4 1 . . . . . 2 5 0 . . . . . 2 6 0 . . . . . 2 7 0 . . . . . 2 8 0 . . . . . 2 9 0 . . . . .

aa1r_human  T F L K I W N D H F R C Q P A P P I D E D L P E E R P D D
aa3r_human  T Y L L I L K A C V V C H P S D S L D T S I E K N S E - -
consensus   * * * * * * * * * * * * * * * * * * * * * * * * * * * * * * * * * * * * * * * * * * * * * * * * * * * * *
3 0 1 . . . . . 3 1 0 . . . . . 3 2 0 . . . . .

```

**Figure S3.** Sequence alignment between hA<sub>1</sub>AR and hA<sub>3</sub>AR according to GPCRdb (sequence identity 46%).<sup>8</sup> The image was generated using the software Boxshade.

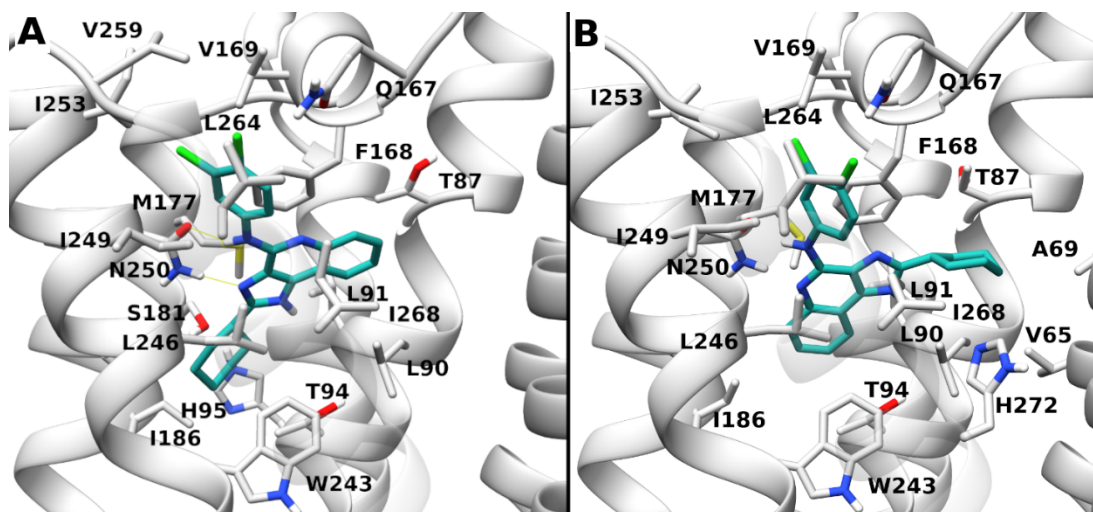

**Figure S4.** **A)** Predicted binding mode of compound **7** at the hA<sub>3</sub>AR orthosteric binding site. **B)** Alternative pose of compound **7** at the hA<sub>3</sub>AR orthosteric binding site (1<sup>st</sup> ranked according to Induced Fit Score).

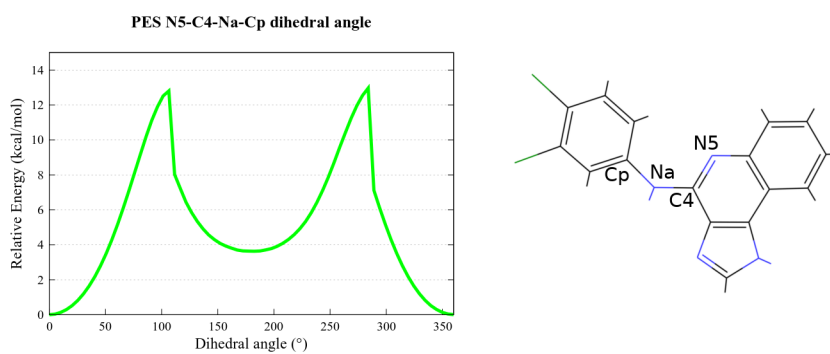

**Figure S5.** Potential energy surface scan of the dihedral angle defined by *N5-C4-N(amino)-Cp(phenyl)* atoms. The calculation was performed with the semiempirical quantum mechanical method GFNn-xTB.

## References:

- (1) Göblyös, A.; Gao, Z.-G.; Brussee, J.; Connestari, R.; Santiago, S. N.; Ye, K.; IJzerman, A. P.; Jacobson, K. A. Structure-activity relationships of new 1H-imidazo[4,5-c]quinolin-4-amine derivatives as allosteric enhancers of the A<sub>3</sub> adenosine receptor. *J. Med. Chem.* **2006**, *49* (11), 3354–3361. DOI: 10.1021/jm060086s.
- (2) Kim, Y.; de Castro, S.; Gao, Z.-G.; IJzerman, A. P.; Jacobson, K. A. Novel 2- and 4-substituted 1H-imidazo[4,5-c]quinolin-4-amine derivatives as allosteric modulators of the A<sub>3</sub> adenosine receptor. *J. Med. Chem.* **2009**, *52* (7), 2098–2108. DOI: 10.1021/jm801659w.
- (3) Fisher, C. L.; Fallot, L. B.; Wan, T. C.; Keyes, R. F.; Suresh, R. R.; Rothwell, A. C.; Gao, Z. G.; Smith, B. C.; Jacobson, K. A.; Auchampach, J. A. Structure activity relationship of dual action purine nucleoside allosteric modulators of the A<sub>3</sub> adenosine receptor. *ACS Pharmacol. Transl. Sci.* **2022**, *5*(8), 625–641, <https://doi.org/10.1021/acspsci.2c00076>.
- (4) Besnard, J.; Ruda, G. F.; Setola, V.; Abecassis, K.; Rodriguiz, R. M.; Huang, X.-P.; Norval, S.; Sassano, M. F.; Shin, A. I.; Webster, L. A.; Simeons, F. R.; Stojanovski, L.; Prat, A.; Seidah, N. G.; Constam, D. B.; Bickerton, G. R.; Read, K. D.; Wetsel, W. C.; Gilbert, I. H.; Roth, B. L.; Hopkins, A. L. Automated design of ligands to polypharmacological profiles. *Nature* **2012**, *492* (7428), 215–220. DOI: 10.1038/nature11691.
- (5) Linden, J.; Patel, A.; Earl, C. Q.; Craig, R. H.; Daluge, S. M. Iodine-125-labeled 8-phenylxanthine derivatives: antagonist radioligands for adenosine A<sub>1</sub> receptors. *J. Med. Chem.* **1988**, *31*, 745-751.
- (6) Linden, J.; Thai, T.; Figler H.; Jin, X.; Robeva, A. S. Characterization of human A<sub>2B</sub> adenosine receptors: radioligand binding, western blotting, and coupling to G<sub>q</sub> in human embryonic kidney 293 cells and HMC-1 mast cells. *Mol. Pharmacol.* **1999**, *56*, 705-713.

(7) Jin, X., Ph.D. thesis, **1995**, University of Virginia.

(8) Kooistra, A. J.; Mordalski, S.; Pándy-Szekeres, G.; Esguerra, M.; Mamyrbekov, A.; Munk, C.; Keserű, G. M.; Gloriam, D. E. GPCRdb in 2021: integrating GPCR sequence, structure and function. *Nucleic Acids Res.* **2021**, *49*, D335–D343, DOI: 10.1093/nar/gkaa1080.
